# Supplementary material for: Beyond Тraining Data Volume: Predicting Nonlinear Effects in Catalytic Reactions with Multiple Kinetic Regimes via Machine Learning
Source: Research Square preprint supplement (doi:10.21203/rs.3.rs-7755576/v1), 2025-10-22
Supplement: Supplementary file 1 [file 3c574cffee156c626d9a876f.xlsx]

## Sheet: kinetics_without_oscillations
time	[Pd(II)]0	k1	[P]t
0	1	3	0
5	1	3	2.3274
10	1	3	3.5623
15	1	3	4.5984
20	1	3	5.4678
25	1	3	6.1972
30	1	3	6.8093
35	1	3	7.3228
40	1	3	7.7537
45	1	3	8.1152
50	1	3	8.4186
55	1	3	8.6731
60	1	3	8.8867
65	1	3	9.0658
70	1	3	9.2162
75	1	3	9.3423
80	1	3	9.4482
85	1	3	9.537
90	1	3	9.6115
95	1	3	9.674
100	1	3	9.7265
0	1	3.0707	0
5	1	3.0707	2.2978
10	1	3.0707	3.5051
15	1	3.0707	4.5231
20	1	3.0707	5.3815
25	1	3.0707	6.1054
30	1	3.0707	6.7158
35	1	3.0707	7.2306
40	1	3.0707	7.6647
45	1	3.0707	8.0307
50	1	3.0707	8.3394
55	1	3.0707	8.5997
60	1	3.0707	8.8191
65	1	3.0707	9.0042
70	1	3.0707	9.1603
75	1	3.0707	9.2919
80	1	3.0707	9.4029
85	1	3.0707	9.4965
90	1	3.0707	9.5754
95	1	3.0707	9.6419
100	1	3.0707	9.6981
0	1	3.1414	0
5	1	3.1414	2.2683
10	1	3.1414	3.4476
15	1	3.1414	4.447
20	1	3.1414	5.2939
25	1	3.1414	6.0117
30	1	3.1414	6.62
35	1	3.1414	7.1355
40	1	3.1414	7.5724
45	1	3.1414	7.9427
50	1	3.1414	8.2565
55	1	3.1414	8.5224
60	1	3.1414	8.7478
65	1	3.1414	8.9388
70	1	3.1414	9.1006
75	1	3.1414	9.2378
80	1	3.1414	9.354
85	1	3.1414	9.4526
90	1	3.1414	9.5361
95	1	3.1414	9.6068
100	1	3.1414	9.6668
0	1	3.2121	0
5	1	3.2121	2.2389
10	1	3.2121	3.3901
15	1	3.2121	4.3705
20	1	3.2121	5.2055
25	1	3.2121	5.9166
30	1	3.2121	6.5223
35	1	3.2121	7.0381
40	1	3.2121	7.4775
45	1	3.2121	7.8516
50	1	3.2121	8.1703
55	1	3.2121	8.4417
60	1	3.2121	8.6728
65	1	3.2121	8.8697
70	1	3.2121	9.0373
75	1	3.2121	9.1801
80	1	3.2121	9.3017
85	1	3.2121	9.4053
90	1	3.2121	9.4935
95	1	3.2121	9.5686
100	1	3.2121	9.6326
0	1	3.2828	0
5	1	3.2828	2.2097
10	1	3.2828	3.3329
15	1	3.2828	4.2941
20	1	3.2828	5.1167
25	1	3.2828	5.8207
30	1	3.2828	6.4233
35	1	3.2828	6.9389
40	1	3.2828	7.3803
45	1	3.2828	7.758
50	1	3.2828	8.0812
55	1	3.2828	8.3578
60	1	3.2828	8.5946
65	1	3.2828	8.7972
70	1	3.2828	8.9706
75	1	3.2828	9.119
80	1	3.2828	9.246
85	1	3.2828	9.3547
90	1	3.2828	9.4478
95	1	3.2828	9.5274
100	1	3.2828	9.5955
0	1	3.3535	0
5	1	3.3535	2.1809
10	1	3.3535	3.2762
15	1	3.3535	4.218
20	1	3.3535	5.0279
25	1	3.3535	5.7244
30	1	3.3535	6.3233
35	1	3.3535	6.8383
40	1	3.3535	7.2812
45	1	3.3535	7.662
50	1	3.3535	7.9895
55	1	3.3535	8.2711
60	1	3.3535	8.5133
65	1	3.3535	8.7215
70	1	3.3535	8.9006
75	1	3.3535	9.0546
80	1	3.3535	9.187
85	1	3.3535	9.3009
90	1	3.3535	9.3988
95	1	3.3535	9.483
100	1	3.3535	9.5554
0	1	3.4242	0
5	1	3.4242	2.1525
10	1	3.4242	3.2201
15	1	3.4242	4.1425
20	1	3.4242	4.9394
25	1	3.4242	5.6278
30	1	3.4242	6.2227
35	1	3.4242	6.7365
40	1	3.4242	7.1805
45	1	3.4242	7.5641
50	1	3.4242	7.8955
55	1	3.4242	8.1818
60	1	3.4242	8.4292
65	1	3.4242	8.6429
70	1	3.4242	8.8275
75	1	3.4242	8.987
80	1	3.4242	9.1248
85	1	3.4242	9.2439
90	1	3.4242	9.3467
95	1	3.4242	9.4356
100	1	3.4242	9.5124
0	1	3.4949	0
5	1	3.4949	2.1245
10	1	3.4949	3.1648
15	1	3.4949	4.0677
20	1	3.4949	4.8513
25	1	3.4949	5.5315
30	1	3.4949	6.1217
35	1	3.4949	6.634
40	1	3.4949	7.0786
45	1	3.4949	7.4645
50	1	3.4949	7.7995
55	1	3.4949	8.0901
60	1	3.4949	8.3424
65	1	3.4949	8.5614
70	1	3.4949	8.7514
75	1	3.4949	8.9163
80	1	3.4949	9.0595
85	1	3.4949	9.1837
90	1	3.4949	9.2915
95	1	3.4949	9.3851
100	1	3.4949	9.4663
0	1	3.5657	0
5	1	3.5657	2.0971
10	1	3.5657	3.1104
15	1	3.5657	3.9939
20	1	3.5657	4.764
25	1	3.5657	5.4354
30	1	3.5657	6.0207
35	1	3.5657	6.5309
40	1	3.5657	6.9758
45	1	3.5657	7.3635
50	1	3.5657	7.7016
55	1	3.5657	7.9963
60	1	3.5657	8.2532
65	1	3.5657	8.4772
70	1	3.5657	8.6725
75	1	3.5657	8.8427
80	1	3.5657	8.9911
85	1	3.5657	9.1205
90	1	3.5657	9.2332
95	1	3.5657	9.3315
100	1	3.5657	9.4173
0	1	3.6364	0
5	1	3.6364	2.0702
10	1	3.6364	3.057
15	1	3.6364	3.921
20	1	3.6364	4.6775
25	1	3.6364	5.3399
30	1	3.6364	5.9198
35	1	3.6364	6.4276
40	1	3.6364	6.8722
45	1	3.6364	7.2614
50	1	3.6364	7.6022
55	1	3.6364	7.9006
60	1	3.6364	8.1619
65	1	3.6364	8.3906
70	1	3.6364	8.5909
75	1	3.6364	8.7662
80	1	3.6364	8.9198
85	1	3.6364	9.0542
90	1	3.6364	9.1719
95	1	3.6364	9.2749
100	1	3.6364	9.3652
0	1	3.7071	0
5	1	3.7071	2.0438
10	1	3.7071	3.0046
15	1	3.7071	3.8493
20	1	3.7071	4.5921
25	1	3.7071	5.2451
30	1	3.7071	5.8193
35	1	3.7071	6.3241
40	1	3.7071	6.768
45	1	3.7071	7.1583
50	1	3.7071	7.5014
55	1	3.7071	7.8031
60	1	3.7071	8.0684
65	1	3.7071	8.3017
70	1	3.7071	8.5068
75	1	3.7071	8.6871
80	1	3.7071	8.8456
85	1	3.7071	8.985
90	1	3.7071	9.1076
95	1	3.7071	9.2153
100	1	3.7071	9.3101
0	1	3.7778	0
5	1	3.7778	2.0181
10	1	3.7778	2.9532
15	1	3.7778	3.7788
20	1	3.7778	4.5077
25	1	3.7778	5.1512
30	1	3.7778	5.7193
35	1	3.7778	6.2208
40	1	3.7778	6.6636
45	1	3.7778	7.0545
50	1	3.7778	7.3996
55	1	3.7778	7.7042
60	1	3.7778	7.9732
65	1	3.7778	8.2107
70	1	3.7778	8.4203
75	1	3.7778	8.6054
80	1	3.7778	8.7688
85	1	3.7778	8.913
90	1	3.7778	9.0404
95	1	3.7778	9.1528
100	1	3.7778	9.2521
0	1	3.8485	0
5	1	3.8485	1.9929
10	1	3.8485	2.9029
15	1	3.8485	3.7096
20	1	3.8485	4.4245
25	1	3.8485	5.0582
30	1	3.8485	5.6199
35	1	3.8485	6.1177
40	1	3.8485	6.5589
45	1	3.8485	6.95
50	1	3.8485	7.2967
55	1	3.8485	7.6039
60	1	3.8485	7.8763
65	1	3.8485	8.1176
70	1	3.8485	8.3316
75	1	3.8485	8.5212
80	1	3.8485	8.6893
85	1	3.8485	8.8382
90	1	3.8485	8.9703
95	1	3.8485	9.0873
100	1	3.8485	9.191
0	1	3.9192	0
5	1	3.9192	1.9683
10	1	3.9192	2.8537
15	1	3.9192	3.6416
20	1	3.9192	4.3426
25	1	3.9192	4.9663
30	1	3.9192	5.5212
35	1	3.9192	6.015
40	1	3.9192	6.4543
45	1	3.9192	6.8452
50	1	3.9192	7.193
55	1	3.9192	7.5025
60	1	3.9192	7.7778
65	1	3.9192	8.0228
70	1	3.9192	8.2408
75	1	3.9192	8.4347
80	1	3.9192	8.6073
85	1	3.9192	8.7608
90	1	3.9192	8.8974
95	1	3.9192	9.019
100	1	3.9192	9.1271
0	1	3.9899	0
5	1	3.9899	1.9443
10	1	3.9899	2.8057
15	1	3.9899	3.575
20	1	3.9899	4.262
25	1	3.9899	4.8755
30	1	3.9899	5.4235
35	1	3.9899	5.9128
40	1	3.9899	6.3499
45	1	3.9899	6.7402
50	1	3.9899	7.0887
55	1	3.9899	7.4
60	1	3.9899	7.678
65	1	3.9899	7.9263
70	1	3.9899	8.1481
75	1	3.9899	8.3461
80	1	3.9899	8.5229
85	1	3.9899	8.6809
90	1	3.9899	8.8219
95	1	3.9899	8.9479
100	1	3.9899	9.0604
0	1	4.0606	0
5	1	4.0606	1.9209
10	1	4.0606	2.7587
15	1	4.0606	3.5097
20	1	4.0606	4.1827
25	1	4.0606	4.786
30	1	4.0606	5.3267
35	1	4.0606	5.8114
40	1	4.0606	6.2457
45	1	4.0606	6.6351
50	1	4.0606	6.984
55	1	4.0606	7.2968
60	1	4.0606	7.5771
65	1	4.0606	7.8284
70	1	4.0606	8.0536
75	1	4.0606	8.2554
80	1	4.0606	8.4363
85	1	4.0606	8.5985
90	1	4.0606	8.7438
95	1	4.0606	8.8741
100	1	4.0606	8.9909
0	1	4.1313	0
5	1	4.1313	1.8981
10	1	4.1313	2.7129
15	1	4.1313	3.4458
20	1	4.1313	4.1049
25	1	4.1313	4.6978
30	1	4.1313	5.231
35	1	4.1313	5.7107
40	1	4.1313	6.142
45	1	4.1313	6.53
50	1	4.1313	6.879
55	1	4.1313	7.1929
60	1	4.1313	7.4752
65	1	4.1313	7.7291
70	1	4.1313	7.9575
75	1	4.1313	8.1629
80	1	4.1313	8.3477
85	1	4.1313	8.5138
90	1	4.1313	8.6633
95	1	4.1313	8.7977
100	1	4.1313	8.9186
0	1	4.202	0
5	1	4.202	1.8759
10	1	4.202	2.6682
15	1	4.202	3.3832
20	1	4.202	4.0285
25	1	4.202	4.6109
30	1	4.202	5.1365
35	1	4.202	5.6108
40	1	4.202	6.0388
45	1	4.202	6.4252
50	1	4.202	6.7738
55	1	4.202	7.0884
60	1	4.202	7.3724
65	1	4.202	7.6286
70	1	4.202	7.8599
75	1	4.202	8.0686
80	1	4.202	8.257
85	1	4.202	8.427
90	1	4.202	8.5804
95	1	4.202	8.7188
100	1	4.202	8.8438
0	1	4.2727	0
5	1	4.2727	1.8542
10	1	4.2727	2.6246
15	1	4.2727	3.3221
20	1	4.2727	3.9536
25	1	4.2727	4.5254
30	1	4.2727	5.0432
35	1	4.2727	5.5119
40	1	4.2727	5.9364
45	1	4.2727	6.3207
50	1	4.2727	6.6686
55	1	4.2727	6.9837
60	1	4.2727	7.2689
65	1	4.2727	7.5272
70	1	4.2727	7.7611
75	1	4.2727	7.9728
80	1	4.2727	8.1645
85	1	4.2727	8.3381
90	1	4.2727	8.4953
95	1	4.2727	8.6376
100	1	4.2727	8.7664
0	1	4.3434	0
5	1	4.3434	1.8331
10	1	4.3434	2.5821
15	1	4.3434	3.2623
20	1	4.3434	3.8802
25	1	4.3434	4.4414
30	1	4.3434	4.9511
35	1	4.3434	5.4141
40	1	4.3434	5.8346
45	1	4.3434	6.2166
50	1	4.3434	6.5636
55	1	4.3434	6.8787
60	1	4.3434	7.1649
65	1	4.3434	7.4249
70	1	4.3434	7.661
75	1	4.3434	7.8755
80	1	4.3434	8.0703
85	1	4.3434	8.2473
90	1	4.3434	8.408
95	1	4.3434	8.554
100	1	4.3434	8.6866
0	1	4.4141	0
5	1	4.4141	1.8126
10	1	4.4141	2.5406
15	1	4.4141	3.2039
20	1	4.4141	3.8082
25	1	4.4141	4.3588
30	1	4.4141	4.8604
35	1	4.4141	5.3174
40	1	4.4141	5.7338
45	1	4.4141	6.1132
50	1	4.4141	6.4588
55	1	4.4141	6.7737
60	1	4.4141	7.0606
65	1	4.4141	7.3219
70	1	4.4141	7.5601
75	1	4.4141	7.777
80	1	4.4141	7.9747
85	1	4.4141	8.1548
90	1	4.4141	8.3189
95	1	4.4141	8.4683
100	1	4.4141	8.6045
0	1	4.4848	0
5	1	4.4848	1.7927
10	1	4.4848	2.5003
15	1	4.4848	3.1469
20	1	4.4848	3.7378
25	1	4.4848	4.2777
30	1	4.4848	4.7711
35	1	4.4848	5.2219
40	1	4.4848	5.6339
45	1	4.4848	6.0103
50	1	4.4848	6.3543
55	1	4.4848	6.6687
60	1	4.4848	6.9559
65	1	4.4848	7.2183
70	1	4.4848	7.4582
75	1	4.4848	7.6773
80	1	4.4848	7.8776
85	1	4.4848	8.0606
90	1	4.4848	8.2278
95	1	4.4848	8.3806
100	1	4.4848	8.5202
0	1	4.5556	0
5	1	4.5556	1.7732
10	1	4.5556	2.461
15	1	4.5556	3.0913
20	1	4.5556	3.6688
25	1	4.5556	4.1981
30	1	4.5556	4.6831
35	1	4.5556	5.1276
40	1	4.5556	5.535
45	1	4.5556	5.9082
50	1	4.5556	6.2503
55	1	4.5556	6.5638
60	1	4.5556	6.851
65	1	4.5556	7.1143
70	1	4.5556	7.3555
75	1	4.5556	7.5766
80	1	4.5556	7.7792
85	1	4.5556	7.9649
90	1	4.5556	8.135
95	1	4.5556	8.2909
100	1	4.5556	8.4338
0	1	4.6263	0
5	1	4.6263	1.7544
10	1	4.6263	2.4227
15	1	4.6263	3.0369
20	1	4.6263	3.6013
25	1	4.6263	4.12
30	1	4.6263	4.5966
35	1	4.6263	5.0346
40	1	4.6263	5.4371
45	1	4.6263	5.8069
50	1	4.6263	6.1468
55	1	4.6263	6.4592
60	1	4.6263	6.7462
65	1	4.6263	7.0099
70	1	4.6263	7.2523
75	1	4.6263	7.475
80	1	4.6263	7.6797
85	1	4.6263	7.8677
90	1	4.6263	8.0406
95	1	4.6263	8.1994
100	1	4.6263	8.3454
0	1	4.697	0
5	1	4.697	1.736
10	1	4.697	2.3855
15	1	4.697	2.984
20	1	4.697	3.5354
25	1	4.697	4.0435
30	1	4.697	4.5116
35	1	4.697	4.943
40	1	4.697	5.3405
45	1	4.697	5.7067
50	1	4.697	6.0441
55	1	4.697	6.355
60	1	4.697	6.6415
65	1	4.697	6.9055
70	1	4.697	7.1487
75	1	4.697	7.3728
80	1	4.697	7.5793
85	1	4.697	7.7695
90	1	4.697	7.9448
95	1	4.697	8.1064
100	1	4.697	8.2552
0	1	4.7677	0
5	1	4.7677	1.7181
10	1	4.7677	2.3493
15	1	4.7677	2.9323
20	1	4.7677	3.4709
25	1	4.7677	3.9685
30	1	4.7677	4.4281
35	1	4.7677	4.8527
40	1	4.7677	5.245
45	1	4.7677	5.6074
50	1	4.7677	5.9421
55	1	4.7677	6.2514
60	1	4.7677	6.537
65	1	4.7677	6.8009
70	1	4.7677	7.0447
75	1	4.7677	7.2699
80	1	4.7677	7.478
85	1	4.7677	7.6702
90	1	4.7677	7.8477
95	1	4.7677	8.0117
100	1	4.7677	8.1633
0	1	4.8384	0
5	1	4.8384	1.7008
10	1	4.8384	2.314
15	1	4.8384	2.8819
20	1	4.8384	3.4079
25	1	4.8384	3.895
30	1	4.8384	4.3461
35	1	4.8384	4.7639
40	1	4.8384	5.1508
45	1	4.8384	5.5091
50	1	4.8384	5.8409
55	1	4.8384	6.1483
60	1	4.8384	6.4329
65	1	4.8384	6.6964
70	1	4.8384	6.9405
75	1	4.8384	7.1666
80	1	4.8384	7.376
85	1	4.8384	7.5699
90	1	4.8384	7.7494
95	1	4.8384	7.9157
100	1	4.8384	8.0697
0	1	4.9091	0
5	1	4.9091	1.6839
10	1	4.9091	2.2797
15	1	4.9091	2.8328
20	1	4.9091	3.3463
25	1	4.9091	3.823
30	1	4.9091	4.2656
35	1	4.9091	4.6764
40	1	4.9091	5.0578
45	1	4.9091	5.4119
50	1	4.9091	5.7406
55	1	4.9091	6.0458
60	1	4.9091	6.3291
65	1	4.9091	6.5921
70	1	4.9091	6.8362
75	1	4.9091	7.0629
80	1	4.9091	7.2733
85	1	4.9091	7.4687
90	1	4.9091	7.65
95	1	4.9091	7.8184
100	1	4.9091	7.9747
0	1	4.9798	0
5	1	4.9798	1.6675
10	1	4.9798	2.2464
15	1	4.9798	2.785
20	1	4.9798	3.2862
25	1	4.9798	3.7526
30	1	4.9798	4.1865
35	1	4.9798	4.5904
40	1	4.9798	4.9662
45	1	4.9798	5.3159
50	1	4.9798	5.6412
55	1	4.9798	5.944
60	1	4.9798	6.2258
65	1	4.9798	6.488
70	1	4.9798	6.7319
75	1	4.9798	6.959
80	1	4.9798	7.1702
85	1	4.9798	7.3668
90	1	4.9798	7.5497
95	1	4.9798	7.7199
100	1	4.9798	7.8783
0	1	5.0505	0
5	1	5.0505	1.6516
10	1	5.0505	2.2139
15	1	5.0505	2.7384
20	1	5.0505	3.2275
25	1	5.0505	3.6837
30	1	5.0505	4.1091
35	1	5.0505	4.5059
40	1	5.0505	4.876
45	1	5.0505	5.2211
50	1	5.0505	5.543
55	1	5.0505	5.8432
60	1	5.0505	6.1232
65	1	5.0505	6.3844
70	1	5.0505	6.6279
75	1	5.0505	6.855
80	1	5.0505	7.0669
85	1	5.0505	7.2644
90	1	5.0505	7.4487
95	1	5.0505	7.6205
100	1	5.0505	7.7808
0	1	5.1212	0
5	1	5.1212	1.6361
10	1	5.1212	2.1824
15	1	5.1212	2.693
20	1	5.1212	3.1702
25	1	5.1212	3.6163
30	1	5.1212	4.0332
35	1	5.1212	4.423
40	1	5.1212	4.7872
45	1	5.1212	5.1277
50	1	5.1212	5.4459
55	1	5.1212	5.7433
60	1	5.1212	6.0214
65	1	5.1212	6.2812
70	1	5.1212	6.5241
75	1	5.1212	6.7511
80	1	5.1212	6.9633
85	1	5.1212	7.1617
90	1	5.1212	7.347
95	1	5.1212	7.5203
100	1	5.1212	7.6823
0	1	5.1919	0
5	1	5.1919	1.6211
10	1	5.1919	2.1517
15	1	5.1919	2.6487
20	1	5.1919	3.1143
25	1	5.1919	3.5504
30	1	5.1919	3.9588
35	1	5.1919	4.3414
40	1	5.1919	4.6998
45	1	5.1919	5.0354
50	1	5.1919	5.3498
55	1	5.1919	5.6443
60	1	5.1919	5.9202
65	1	5.1919	6.1785
70	1	5.1919	6.4206
75	1	5.1919	6.6472
80	1	5.1919	6.8596
85	1	5.1919	7.0584
90	1	5.1919	7.2447
95	1	5.1919	7.4192
100	1	5.1919	7.5827
0	1	5.2626	0
5	1	5.2626	1.6065
10	1	5.2626	2.1219
15	1	5.2626	2.6057
20	1	5.2626	3.0598
25	1	5.2626	3.486
30	1	5.2626	3.886
35	1	5.2626	4.2615
40	1	5.2626	4.6139
45	1	5.2626	4.9446
50	1	5.2626	5.2551
55	1	5.2626	5.5465
60	1	5.2626	5.82
65	1	5.2626	6.0767
70	1	5.2626	6.3176
75	1	5.2626	6.5437
80	1	5.2626	6.756
85	1	5.2626	6.9552
90	1	5.2626	7.1422
95	1	5.2626	7.3177
100	1	5.2626	7.4824
0	1	5.3333	0
5	1	5.3333	1.5923
10	1	5.3333	2.0929
15	1	5.3333	2.5638
20	1	5.3333	3.0066
25	1	5.3333	3.4231
30	1	5.3333	3.8147
35	1	5.3333	4.183
40	1	5.3333	4.5294
45	1	5.3333	4.8552
50	1	5.3333	5.1616
55	1	5.3333	5.4497
60	1	5.3333	5.7207
65	1	5.3333	5.9755
70	1	5.3333	6.2151
75	1	5.3333	6.4405
80	1	5.3333	6.6525
85	1	5.3333	6.8518
90	1	5.3333	7.0393
95	1	5.3333	7.2156
100	1	5.3333	7.3814
0	1	5.404	0
5	1	5.404	1.5785
10	1	5.404	2.0648
15	1	5.404	2.523
20	1	5.404	2.9548
25	1	5.404	3.3616
30	1	5.404	3.7449
35	1	5.404	4.1061
40	1	5.404	4.4465
45	1	5.404	4.7672
50	1	5.404	5.0693
55	1	5.404	5.3541
60	1	5.404	5.6223
65	1	5.404	5.8751
70	1	5.404	6.1133
75	1	5.404	6.3378
80	1	5.404	6.5492
85	1	5.404	6.7485
90	1	5.404	6.9363
95	1	5.404	7.1132
100	1	5.404	7.2799
0	1	5.4747	0
5	1	5.4747	1.5651
10	1	5.4747	2.0374
15	1	5.4747	2.4833
20	1	5.4747	2.9042
25	1	5.4747	3.3015
30	1	5.4747	3.6766
35	1	5.4747	4.0307
40	1	5.4747	4.365
45	1	5.4747	4.6805
50	1	5.4747	4.9784
55	1	5.4747	5.2596
60	1	5.4747	5.525
65	1	5.4747	5.7756
70	1	5.4747	6.0122
75	1	5.4747	6.2355
80	1	5.4747	6.4463
85	1	5.4747	6.6453
90	1	5.4747	6.8331
95	1	5.4747	7.0105
100	1	5.4747	7.1779
0	1	5.5455	0
5	1	5.5455	1.5521
10	1	5.5455	2.0108
15	1	5.5455	2.4446
20	1	5.5455	2.8549
25	1	5.5455	3.2429
30	1	5.5455	3.6099
35	1	5.5455	3.9569
40	1	5.5455	4.285
45	1	5.5455	4.5954
50	1	5.5455	4.8888
55	1	5.5455	5.1664
60	1	5.5455	5.4289
65	1	5.5455	5.6771
70	1	5.5455	5.9119
75	1	5.5455	6.1338
80	1	5.5455	6.3438
85	1	5.5455	6.5423
90	1	5.5455	6.7301
95	1	5.5455	6.9077
100	1	5.5455	7.0756
0	1	5.6162	0
5	1	5.6162	1.5394
10	1	5.6162	1.985
15	1	5.6162	2.407
20	1	5.6162	2.8069
25	1	5.6162	3.1857
30	1	5.6162	3.5445
35	1	5.6162	3.8845
40	1	5.6162	4.2065
45	1	5.6162	4.5116
50	1	5.6162	4.8006
55	1	5.6162	5.0744
60	1	5.6162	5.3338
65	1	5.6162	5.5795
70	1	5.6162	5.8123
75	1	5.6162	6.0328
80	1	5.6162	6.2417
85	1	5.6162	6.4397
90	1	5.6162	6.6271
95	1	5.6162	6.8048
100	1	5.6162	6.973
0	1	5.6869	0
5	1	5.6869	1.5271
10	1	5.6869	1.9598
15	1	5.6869	2.3705
20	1	5.6869	2.7601
25	1	5.6869	3.1298
30	1	5.6869	3.4807
35	1	5.6869	3.8136
40	1	5.6869	4.1296
45	1	5.6869	4.4294
50	1	5.6869	4.7138
55	1	5.6869	4.9838
60	1	5.6869	5.24
65	1	5.6869	5.4831
70	1	5.6869	5.7138
75	1	5.6869	5.9326
80	1	5.6869	6.1404
85	1	5.6869	6.3375
90	1	5.6869	6.5245
95	1	5.6869	6.702
100	1	5.6869	6.8704
0	1	5.7576	0
5	1	5.7576	1.5152
10	1	5.7576	1.9354
15	1	5.7576	2.3349
20	1	5.7576	2.7145
25	1	5.7576	3.0753
30	1	5.7576	3.4183
35	1	5.7576	3.7443
40	1	5.7576	4.0541
45	1	5.7576	4.3486
50	1	5.7576	4.6285
55	1	5.7576	4.8945
60	1	5.7576	5.1474
65	1	5.7576	5.3877
70	1	5.7576	5.6162
75	1	5.7576	5.8333
80	1	5.7576	6.0397
85	1	5.7576	6.2358
90	1	5.7576	6.4222
95	1	5.7576	6.5994
100	1	5.7576	6.7679
0	1	5.8283	0
5	1	5.8283	1.5036
10	1	5.8283	1.9117
15	1	5.8283	2.3003
20	1	5.8283	2.6701
25	1	5.8283	3.0222
30	1	5.8283	3.3574
35	1	5.8283	3.6764
40	1	5.8283	3.9802
45	1	5.8283	4.2693
50	1	5.8283	4.5446
55	1	5.8283	4.8066
60	1	5.8283	5.0561
65	1	5.8283	5.2936
70	1	5.8283	5.5196
75	1	5.8283	5.7348
80	1	5.8283	5.9397
85	1	5.8283	6.1347
90	1	5.8283	6.3204
95	1	5.8283	6.4971
100	1	5.8283	6.6654
0	1	5.899	0
5	1	5.899	1.4924
10	1	5.899	1.8887
15	1	5.899	2.2666
20	1	5.899	2.6269
25	1	5.899	2.9703
30	1	5.899	3.2978
35	1	5.899	3.6101
40	1	5.899	3.9077
45	1	5.899	4.1916
50	1	5.899	4.4621
55	1	5.899	4.7201
60	1	5.899	4.9661
65	1	5.899	5.2006
70	1	5.899	5.4242
75	1	5.899	5.6374
80	1	5.899	5.8406
85	1	5.899	6.0344
90	1	5.899	6.2191
95	1	5.899	6.3952
100	1	5.899	6.5632
0	1	5.9697	0
5	1	5.9697	1.4815
10	1	5.9697	1.8664
15	1	5.9697	2.2339
20	1	5.9697	2.5848
25	1	5.9697	2.9198
30	1	5.9697	3.2397
35	1	5.9697	3.5452
40	1	5.9697	3.8368
45	1	5.9697	4.1153
50	1	5.9697	4.3812
55	1	5.9697	4.635
60	1	5.9697	4.8774
65	1	5.9697	5.1089
70	1	5.9697	5.3299
75	1	5.9697	5.5409
80	1	5.9697	5.7424
85	1	5.9697	5.9347
90	1	5.9697	6.1184
95	1	5.9697	6.2938
100	1	5.9697	6.4613
0	1	6.0404	0
5	1	6.0404	1.4709
10	1	6.0404	1.8446
15	1	6.0404	2.202
20	1	6.0404	2.5438
25	1	6.0404	2.8705
30	1	6.0404	3.183
35	1	6.0404	3.4817
40	1	6.0404	3.7674
45	1	6.0404	4.0405
50	1	6.0404	4.3017
55	1	6.0404	4.5514
60	1	6.0404	4.7901
65	1	6.0404	5.0185
70	1	6.0404	5.2368
75	1	6.0404	5.4455
80	1	6.0404	5.6451
85	1	6.0404	5.8359
90	1	6.0404	6.0184
95	1	6.0404	6.1929
100	1	6.0404	6.3597
0	1	6.1111	0
5	1	6.1111	1.4605
10	1	6.1111	1.8235
15	1	6.1111	2.1711
20	1	6.1111	2.5038
25	1	6.1111	2.8225
30	1	6.1111	3.1276
35	1	6.1111	3.4197
40	1	6.1111	3.6994
45	1	6.1111	3.9672
50	1	6.1111	4.2236
55	1	6.1111	4.4692
60	1	6.1111	4.7042
65	1	6.1111	4.9293
70	1	6.1111	5.1449
75	1	6.1111	5.3513
80	1	6.1111	5.5488
85	1	6.1111	5.738
90	1	6.1111	5.9192
95	1	6.1111	6.0927
100	1	6.1111	6.2587
0	1	6.1818	0
5	1	6.1818	1.4505
10	1	6.1818	1.803
15	1	6.1818	2.141
20	1	6.1818	2.465
25	1	6.1818	2.7757
30	1	6.1818	3.0735
35	1	6.1818	3.3591
40	1	6.1818	3.6329
45	1	6.1818	3.8954
50	1	6.1818	4.1471
55	1	6.1818	4.3884
60	1	6.1818	4.6197
65	1	6.1818	4.8416
70	1	6.1818	5.0542
75	1	6.1818	5.2582
80	1	6.1818	5.4537
85	1	6.1818	5.6411
90	1	6.1818	5.8208
95	1	6.1818	5.9931
100	1	6.1818	6.1583
0	1	6.2525	0
5	1	6.2525	1.4408
10	1	6.2525	1.7831
15	1	6.2525	2.1117
20	1	6.2525	2.4272
25	1	6.2525	2.73
30	1	6.2525	3.0208
35	1	6.2525	3.2999
40	1	6.2525	3.5678
45	1	6.2525	3.8251
50	1	6.2525	4.072
55	1	6.2525	4.3091
60	1	6.2525	4.5367
65	1	6.2525	4.7552
70	1	6.2525	4.9649
75	1	6.2525	5.1663
80	1	6.2525	5.3596
85	1	6.2525	5.5451
90	1	6.2525	5.7233
95	1	6.2525	5.8943
100	1	6.2525	6.0585
0	1	6.3232	0
5	1	6.3232	1.4314
10	1	6.3232	1.7638
15	1	6.3232	2.0833
20	1	6.3232	2.3904
25	1	6.3232	2.6856
30	1	6.3232	2.9693
35	1	6.3232	3.2421
40	1	6.3232	3.5042
45	1	6.3232	3.7562
50	1	6.3232	3.9984
55	1	6.3232	4.2312
60	1	6.3232	4.455
65	1	6.3232	4.6701
70	1	6.3232	4.8769
75	1	6.3232	5.0756
80	1	6.3232	5.2666
85	1	6.3232	5.4503
90	1	6.3232	5.6268
95	1	6.3232	5.7964
100	1	6.3232	5.9595
0	1	6.3939	0
5	1	6.3939	1.4222
10	1	6.3939	1.745
15	1	6.3939	2.0556
20	1	6.3939	2.3546
25	1	6.3939	2.6423
30	1	6.3939	2.9192
35	1	6.3939	3.1856
40	1	6.3939	3.442
45	1	6.3939	3.6888
50	1	6.3939	3.9263
55	1	6.3939	4.1549
60	1	6.3939	4.3748
65	1	6.3939	4.5865
70	1	6.3939	4.7902
75	1	6.3939	4.9862
80	1	6.3939	5.1749
85	1	6.3939	5.3565
90	1	6.3939	5.5312
95	1	6.3939	5.6994
100	1	6.3939	5.8612
0	1	6.4646	0
5	1	6.4646	1.4133
10	1	6.4646	1.7268
15	1	6.4646	2.0288
20	1	6.4646	2.3197
25	1	6.4646	2.6001
30	1	6.4646	2.8702
35	1	6.4646	3.1305
40	1	6.4646	3.3813
45	1	6.4646	3.6229
50	1	6.4646	3.8557
55	1	6.4646	4.0799
60	1	6.4646	4.2961
65	1	6.4646	4.5043
70	1	6.4646	4.7049
75	1	6.4646	4.8982
80	1	6.4646	5.0844
85	1	6.4646	5.2638
90	1	6.4646	5.4367
95	1	6.4646	5.6033
100	1	6.4646	5.7638
0	1	6.5354	0
5	1	6.5354	1.4047
10	1	6.5354	1.709
15	1	6.5354	2.0026
20	1	6.5354	2.2859
25	1	6.5354	2.559
30	1	6.5354	2.8225
35	1	6.5354	3.0767
40	1	6.5354	3.3219
45	1	6.5354	3.5584
50	1	6.5354	3.7865
55	1	6.5354	4.0065
60	1	6.5354	4.2188
65	1	6.5354	4.4235
70	1	6.5354	4.621
75	1	6.5354	4.8115
80	1	6.5354	4.9952
85	1	6.5354	5.1724
90	1	6.5354	5.3434
95	1	6.5354	5.5083
100	1	6.5354	5.6673
0	1	6.6061	0
5	1	6.6061	1.3963
10	1	6.6061	1.6918
15	1	6.6061	1.9773
20	1	6.6061	2.2529
25	1	6.6061	2.519
30	1	6.6061	2.776
35	1	6.6061	3.0242
40	1	6.6061	3.2639
45	1	6.6061	3.4953
50	1	6.6061	3.7188
55	1	6.6061	3.9345
60	1	6.6061	4.1429
65	1	6.6061	4.3441
70	1	6.6061	4.5384
75	1	6.6061	4.7261
80	1	6.6061	4.9073
85	1	6.6061	5.0822
90	1	6.6061	5.2512
95	1	6.6061	5.4143
100	1	6.6061	5.5719
0	1	6.6768	0
5	1	6.6768	1.3881
10	1	6.6768	1.6751
15	1	6.6768	1.9526
20	1	6.6768	2.2208
25	1	6.6768	2.4801
30	1	6.6768	2.7307
35	1	6.6768	2.973
40	1	6.6768	3.2072
45	1	6.6768	3.4336
50	1	6.6768	3.6525
55	1	6.6768	3.864
60	1	6.6768	4.0685
65	1	6.6768	4.2662
70	1	6.6768	4.4573
75	1	6.6768	4.6421
80	1	6.6768	4.8206
85	1	6.6768	4.9933
90	1	6.6768	5.1601
95	1	6.6768	5.3214
100	1	6.6768	5.4774
0	1	6.7475	0
5	1	6.7475	1.3802
10	1	6.7475	1.6589
15	1	6.7475	1.9286
20	1	6.7475	2.1896
25	1	6.7475	2.4422
30	1	6.7475	2.6866
35	1	6.7475	2.923
40	1	6.7475	3.1519
45	1	6.7475	3.3733
50	1	6.7475	3.5876
55	1	6.7475	3.795
60	1	6.7475	3.9956
65	1	6.7475	4.1898
70	1	6.7475	4.3776
75	1	6.7475	4.5594
80	1	6.7475	4.7354
85	1	6.7475	4.9056
90	1	6.7475	5.0703
95	1	6.7475	5.2297
100	1	6.7475	5.384
0	1	6.8182	0
5	1	6.8182	1.3725
10	1	6.8182	1.6431
15	1	6.8182	1.9053
20	1	6.8182	2.1593
25	1	6.8182	2.4053
30	1	6.8182	2.6435
35	1	6.8182	2.8743
40	1	6.8182	3.0979
45	1	6.8182	3.3144
50	1	6.8182	3.5242
55	1	6.8182	3.7273
60	1	6.8182	3.9241
65	1	6.8182	4.1147
70	1	6.8182	4.2994
75	1	6.8182	4.4782
80	1	6.8182	4.6514
85	1	6.8182	4.8192
90	1	6.8182	4.9818
95	1	6.8182	5.1392
100	1	6.8182	5.2917
0	1	6.8889	0
5	1	6.8889	1.365
10	1	6.8889	1.6278
15	1	6.8889	1.8827
20	1	6.8889	2.1298
25	1	6.8889	2.3693
30	1	6.8889	2.6016
35	1	6.8889	2.8268
40	1	6.8889	3.0451
45	1	6.8889	3.2568
50	1	6.8889	3.4621
55	1	6.8889	3.6611
60	1	6.8889	3.8541
65	1	6.8889	4.0411
70	1	6.8889	4.2225
75	1	6.8889	4.3984
80	1	6.8889	4.5689
85	1	6.8889	4.7342
90	1	6.8889	4.8945
95	1	6.8889	5.0499
100	1	6.8889	5.2006
0	1	6.9596	0
5	1	6.9596	1.3577
10	1	6.9596	1.613
15	1	6.9596	1.8607
20	1	6.9596	2.1011
25	1	6.9596	2.3344
30	1	6.9596	2.5608
35	1	6.9596	2.7805
40	1	6.9596	2.9937
45	1	6.9596	3.2006
50	1	6.9596	3.4014
55	1	6.9596	3.5963
60	1	6.9596	3.7854
65	1	6.9596	3.969
70	1	6.9596	4.1471
75	1	6.9596	4.32
80	1	6.9596	4.4877
85	1	6.9596	4.6505
90	1	6.9596	4.8085
95	1	6.9596	4.9618
100	1	6.9596	5.1106
0	1	7.0303	0
5	1	7.0303	1.3507
10	1	7.0303	1.5985
15	1	7.0303	1.8393
20	1	7.0303	2.0732
25	1	7.0303	2.3003
30	1	7.0303	2.521
35	1	7.0303	2.7353
40	1	7.0303	2.9435
45	1	7.0303	3.1457
50	1	7.0303	3.3421
55	1	7.0303	3.5329
60	1	7.0303	3.7183
65	1	7.0303	3.8983
70	1	7.0303	4.0731
75	1	7.0303	4.243
80	1	7.0303	4.4079
85	1	7.0303	4.5682
90	1	7.0303	4.7239
95	1	7.0303	4.8751
100	1	7.0303	5.0219
0	1	7.101	0
5	1	7.101	1.3438
10	1	7.101	1.5845
15	1	7.101	1.8185
20	1	7.101	2.046
25	1	7.101	2.2672
30	1	7.101	2.4822
35	1	7.101	2.6913
40	1	7.101	2.8945
45	1	7.101	3.0921
50	1	7.101	3.2841
55	1	7.101	3.4709
60	1	7.101	3.6524
65	1	7.101	3.8289
70	1	7.101	4.0005
75	1	7.101	4.1673
80	1	7.101	4.3295
85	1	7.101	4.4872
90	1	7.101	4.6405
95	1	7.101	4.7895
100	1	7.101	4.9344
0	1	7.1717	0
5	1	7.1717	1.3372
10	1	7.1717	1.5709
15	1	7.1717	1.7984
20	1	7.1717	2.0197
25	1	7.1717	2.235
30	1	7.1717	2.4445
35	1	7.1717	2.6484
40	1	7.1717	2.8467
45	1	7.1717	3.0397
50	1	7.1717	3.2275
55	1	7.1717	3.4103
60	1	7.1717	3.5881
65	1	7.1717	3.7611
70	1	7.1717	3.9294
75	1	7.1717	4.0932
80	1	7.1717	4.2526
85	1	7.1717	4.4076
90	1	7.1717	4.5585
95	1	7.1717	4.7054
100	1	7.1717	4.8482
0	1	7.2424	0
5	1	7.2424	1.3307
10	1	7.2424	1.5577
15	1	7.2424	1.7788
20	1	7.2424	1.994
25	1	7.2424	2.2036
30	1	7.2424	2.4078
35	1	7.2424	2.6065
40	1	7.2424	2.8001
45	1	7.2424	2.9886
50	1	7.2424	3.1722
55	1	7.2424	3.351
60	1	7.2424	3.5251
65	1	7.2424	3.6946
70	1	7.2424	3.8597
75	1	7.2424	4.0205
80	1	7.2424	4.177
85	1	7.2424	4.3295
90	1	7.2424	4.478
95	1	7.2424	4.6225
100	1	7.2424	4.7633
0	1	7.3131	0
5	1	7.3131	1.3244
10	1	7.3131	1.5449
15	1	7.3131	1.7597
20	1	7.3131	1.9691
25	1	7.3131	2.1731
30	1	7.3131	2.372
35	1	7.3131	2.5658
40	1	7.3131	2.7547
45	1	7.3131	2.9388
50	1	7.3131	3.1182
55	1	7.3131	3.2931
60	1	7.3131	3.4635
65	1	7.3131	3.6295
70	1	7.3131	3.7914
75	1	7.3131	3.9492
80	1	7.3131	4.1029
85	1	7.3131	4.2527
90	1	7.3131	4.3988
95	1	7.3131	4.5411
100	1	7.3131	4.6798
0	1	7.3838	0
5	1	7.3838	1.3183
10	1	7.3838	1.5324
15	1	7.3838	1.7412
20	1	7.3838	1.9448
25	1	7.3838	2.1435
30	1	7.3838	2.3372
35	1	7.3838	2.5261
40	1	7.3838	2.7104
45	1	7.3838	2.8902
50	1	7.3838	3.0655
55	1	7.3838	3.2365
60	1	7.3838	3.4032
65	1	7.3838	3.5659
70	1	7.3838	3.7245
75	1	7.3838	3.8793
80	1	7.3838	4.0302
85	1	7.3838	4.1774
90	1	7.3838	4.321
95	1	7.3838	4.461
100	1	7.3838	4.5976
0	1	7.4545	0
5	1	7.4545	1.3124
10	1	7.4545	1.5203
15	1	7.4545	1.7232
20	1	7.4545	1.9213
25	1	7.4545	2.1146
30	1	7.4545	2.3033
35	1	7.4545	2.4875
40	1	7.4545	2.6672
45	1	7.4545	2.8427
50	1	7.4545	3.014
55	1	7.4545	3.1812
60	1	7.4545	3.3443
65	1	7.4545	3.5036
70	1	7.4545	3.659
75	1	7.4545	3.8108
80	1	7.4545	3.9589
85	1	7.4545	4.1034
90	1	7.4545	4.2445
95	1	7.4545	4.3823
100	1	7.4545	4.5167
0	1	7.5253	0
5	1	7.5253	1.3067
10	1	7.5253	1.5085
15	1	7.5253	1.7058
20	1	7.5253	1.8984
25	1	7.5253	2.0865
30	1	7.5253	2.2703
35	1	7.5253	2.4498
40	1	7.5253	2.6252
45	1	7.5253	2.7964
50	1	7.5253	2.9637
55	1	7.5253	3.1271
60	1	7.5253	3.2868
65	1	7.5253	3.4427
70	1	7.5253	3.595
75	1	7.5253	3.7437
80	1	7.5253	3.889
85	1	7.5253	4.0309
90	1	7.5253	4.1695
95	1	7.5253	4.3049
100	1	7.5253	4.4372
0	1	7.596	0
5	1	7.596	1.3011
10	1	7.596	1.4971
15	1	7.596	1.6888
20	1	7.596	1.8761
25	1	7.596	2.0592
30	1	7.596	2.2382
35	1	7.596	2.4132
40	1	7.596	2.5842
45	1	7.596	2.7513
50	1	7.596	2.9147
55	1	7.596	3.0744
60	1	7.596	3.2305
65	1	7.596	3.3831
70	1	7.596	3.5322
75	1	7.596	3.678
80	1	7.596	3.8205
85	1	7.596	3.9598
90	1	7.596	4.0959
95	1	7.596	4.229
100	1	7.596	4.3591
0	1	7.6667	0
5	1	7.6667	1.2956
10	1	7.6667	1.486
15	1	7.6667	1.6723
20	1	7.6667	1.8545
25	1	7.6667	2.0327
30	1	7.6667	2.207
35	1	7.6667	2.3774
40	1	7.6667	2.5442
45	1	7.6667	2.7073
50	1	7.6667	2.8668
55	1	7.6667	3.0229
60	1	7.6667	3.1755
65	1	7.6667	3.3248
70	1	7.6667	3.4708
75	1	7.6667	3.6137
80	1	7.6667	3.7534
85	1	7.6667	3.89
90	1	7.6667	4.0237
95	1	7.6667	4.1544
100	1	7.6667	4.2823
0	1	7.7374	0
5	1	7.7374	1.2903
10	1	7.7374	1.4753
15	1	7.7374	1.6563
20	1	7.7374	1.8334
25	1	7.7374	2.0069
30	1	7.7374	2.1766
35	1	7.7374	2.3427
40	1	7.7374	2.5053
45	1	7.7374	2.6644
50	1	7.7374	2.8202
55	1	7.7374	2.9726
60	1	7.7374	3.1218
65	1	7.7374	3.2679
70	1	7.7374	3.4108
75	1	7.7374	3.5507
80	1	7.7374	3.6877
85	1	7.7374	3.8217
90	1	7.7374	3.9529
95	1	7.7374	4.0813
100	1	7.7374	4.207
0	1	7.8081	0
5	1	7.8081	1.2852
10	1	7.8081	1.4648
15	1	7.8081	1.6407
20	1	7.8081	1.813
25	1	7.8081	1.9817
30	1	7.8081	2.147
35	1	7.8081	2.3088
40	1	7.8081	2.4674
45	1	7.8081	2.6226
50	1	7.8081	2.7746
55	1	7.8081	2.9236
60	1	7.8081	3.0694
65	1	7.8081	3.2122
70	1	7.8081	3.3521
75	1	7.8081	3.4891
80	1	7.8081	3.6233
85	1	7.8081	3.7548
90	1	7.8081	3.8835
95	1	7.8081	4.0095
100	1	7.8081	4.133
0	1	7.8788	0
5	1	7.8788	1.2802
10	1	7.8788	1.4547
15	1	7.8788	1.6256
20	1	7.8788	1.7931
25	1	7.8788	1.9573
30	1	7.8788	2.1182
35	1	7.8788	2.2759
40	1	7.8788	2.4304
45	1	7.8788	2.5818
50	1	7.8788	2.7302
55	1	7.8788	2.8757
60	1	7.8788	3.0182
65	1	7.8788	3.1579
70	1	7.8788	3.2947
75	1	7.8788	3.4289
80	1	7.8788	3.5603
85	1	7.8788	3.6892
90	1	7.8788	3.8154
95	1	7.8788	3.9391
100	1	7.8788	4.0604
0	1	7.9495	0
5	1	7.9495	1.2754
10	1	7.9495	1.4448
15	1	7.9495	1.6109
20	1	7.9495	1.7738
25	1	7.9495	1.9336
30	1	7.9495	2.0902
35	1	7.9495	2.2438
40	1	7.9495	2.3944
45	1	7.9495	2.5421
50	1	7.9495	2.6869
55	1	7.9495	2.829
60	1	7.9495	2.9682
65	1	7.9495	3.1048
70	1	7.9495	3.2387
75	1	7.9495	3.3699
80	1	7.9495	3.4987
85	1	7.9495	3.6249
90	1	7.9495	3.7487
95	1	7.9495	3.8701
100	1	7.9495	3.9892
0	1	8.0202	0
5	1	8.0202	1.2707
10	1	8.0202	1.4352
15	1	8.0202	1.5967
20	1	8.0202	1.7551
25	1	8.0202	1.9105
30	1	8.0202	2.063
35	1	8.0202	2.2126
40	1	8.0202	2.3594
45	1	8.0202	2.5034
50	1	8.0202	2.6447
55	1	8.0202	2.7834
60	1	8.0202	2.9194
65	1	8.0202	3.0529
70	1	8.0202	3.1838
75	1	8.0202	3.3123
80	1	8.0202	3.4384
85	1	8.0202	3.5621
90	1	8.0202	3.6834
95	1	8.0202	3.8025
100	1	8.0202	3.9193
0	1	8.0909	0
5	1	8.0909	1.2661
10	1	8.0909	1.4259
15	1	8.0909	1.5828
20	1	8.0909	1.7368
25	1	8.0909	1.888
30	1	8.0909	2.0365
35	1	8.0909	2.1822
40	1	8.0909	2.3253
45	1	8.0909	2.4657
50	1	8.0909	2.6036
55	1	8.0909	2.7389
60	1	8.0909	2.8718
65	1	8.0909	3.0022
70	1	8.0909	3.1303
75	1	8.0909	3.256
80	1	8.0909	3.3794
85	1	8.0909	3.5006
90	1	8.0909	3.6195
95	1	8.0909	3.7363
100	1	8.0909	3.8509
0	1	8.1616	0
5	1	8.1616	1.2616
10	1	8.1616	1.4169
15	1	8.1616	1.5694
20	1	8.1616	1.7191
25	1	8.1616	1.8662
30	1	8.1616	2.0107
35	1	8.1616	2.1526
40	1	8.1616	2.292
45	1	8.1616	2.429
50	1	8.1616	2.5635
55	1	8.1616	2.6956
60	1	8.1616	2.8253
65	1	8.1616	2.9528
70	1	8.1616	3.078
75	1	8.1616	3.2009
80	1	8.1616	3.3217
85	1	8.1616	3.4404
90	1	8.1616	3.5569
95	1	8.1616	3.6713
100	1	8.1616	3.7838
0	1	8.2323	0
5	1	8.2323	1.2573
10	1	8.2323	1.4081
15	1	8.2323	1.5563
20	1	8.2323	1.7019
25	1	8.2323	1.845
30	1	8.2323	1.9856
35	1	8.2323	2.1239
40	1	8.2323	2.2597
45	1	8.2323	2.3932
50	1	8.2323	2.5244
55	1	8.2323	2.6533
60	1	8.2323	2.78
65	1	8.2323	2.9045
70	1	8.2323	3.0269
75	1	8.2323	3.1471
80	1	8.2323	3.2653
85	1	8.2323	3.3815
90	1	8.2323	3.4956
95	1	8.2323	3.6078
100	1	8.2323	3.718
0	1	8.303	0
5	1	8.303	1.2531
10	1	8.303	1.3996
15	1	8.303	1.5436
20	1	8.303	1.6852
25	1	8.303	1.8244
30	1	8.303	1.9613
35	1	8.303	2.0959
40	1	8.303	2.2282
45	1	8.303	2.3583
50	1	8.303	2.4863
55	1	8.303	2.6121
60	1	8.303	2.7358
65	1	8.303	2.8574
70	1	8.303	2.977
75	1	8.303	3.0946
80	1	8.303	3.2102
85	1	8.303	3.3239
90	1	8.303	3.4357
95	1	8.303	3.5456
100	1	8.303	3.6536
0	1	8.3737	0
5	1	8.3737	1.249
10	1	8.3737	1.3913
15	1	8.3737	1.5312
20	1	8.3737	1.6689
25	1	8.3737	1.8043
30	1	8.3737	1.9376
35	1	8.3737	2.0686
40	1	8.3737	2.1975
45	1	8.3737	2.3244
50	1	8.3737	2.4491
55	1	8.3737	2.5719
60	1	8.3737	2.6926
65	1	8.3737	2.8114
70	1	8.3737	2.9283
75	1	8.3737	3.0432
80	1	8.3737	3.1563
85	1	8.3737	3.2676
90	1	8.3737	3.377
95	1	8.3737	3.4847
100	1	8.3737	3.5906
0	1	8.4444	0
5	1	8.4444	1.2451
10	1	8.4444	1.3833
15	1	8.4444	1.5193
20	1	8.4444	1.6531
25	1	8.4444	1.7848
30	1	8.4444	1.9145
35	1	8.4444	2.0421
40	1	8.4444	2.1677
45	1	8.4444	2.2913
50	1	8.4444	2.413
55	1	8.4444	2.5327
60	1	8.4444	2.6506
65	1	8.4444	2.7666
70	1	8.4444	2.8807
75	1	8.4444	2.9931
80	1	8.4444	3.1037
85	1	8.4444	3.2125
90	1	8.4444	3.3196
95	1	8.4444	3.4251
100	1	8.4444	3.5289
0	1	8.5152	0
5	1	8.5152	1.2412
10	1	8.5152	1.3754
15	1	8.5152	1.5076
20	1	8.5152	1.6377
25	1	8.5152	1.7659
30	1	8.5152	1.8921
35	1	8.5152	2.0163
40	1	8.5152	2.1387
45	1	8.5152	2.2591
50	1	8.5152	2.3777
55	1	8.5152	2.4945
60	1	8.5152	2.6096
65	1	8.5152	2.7228
70	1	8.5152	2.8343
75	1	8.5152	2.9441
80	1	8.5152	3.0523
85	1	8.5152	3.1587
90	1	8.5152	3.2636
95	1	8.5152	3.3668
100	1	8.5152	3.4684
0	1	8.5859	0
5	1	8.5859	1.2375
10	1	8.5859	1.3679
15	1	8.5859	1.4963
20	1	8.5859	1.6228
25	1	8.5859	1.7475
30	1	8.5859	1.8703
35	1	8.5859	1.9912
40	1	8.5859	2.1104
45	1	8.5859	2.2278
50	1	8.5859	2.3434
55	1	8.5859	2.4574
60	1	8.5859	2.5696
65	1	8.5859	2.6801
70	1	8.5859	2.7891
75	1	8.5859	2.8964
80	1	8.5859	3.002
85	1	8.5859	3.1062
90	1	8.5859	3.2087
95	1	8.5859	3.3098
100	1	8.5859	3.4093
0	1	8.6566	0
5	1	8.6566	1.2338
10	1	8.6566	1.3605
15	1	8.6566	1.4853
20	1	8.6566	1.6083
25	1	8.6566	1.7296
30	1	8.6566	1.8491
35	1	8.6566	1.9668
40	1	8.6566	2.0829
45	1	8.6566	2.1973
50	1	8.6566	2.31
55	1	8.6566	2.4211
60	1	8.6566	2.5306
65	1	8.6566	2.6385
70	1	8.6566	2.7449
75	1	8.6566	2.8497
80	1	8.6566	2.953
85	1	8.6566	3.0548
90	1	8.6566	3.1552
95	1	8.6566	3.2541
100	1	8.6566	3.3515
0	1	8.7273	0
5	1	8.7273	1.2303
10	1	8.7273	1.3533
15	1	8.7273	1.4746
20	1	8.7273	1.5942
25	1	8.7273	1.7122
30	1	8.7273	1.8284
35	1	8.7273	1.9431
40	1	8.7273	2.0561
45	1	8.7273	2.1676
50	1	8.7273	2.2774
55	1	8.7273	2.3858
60	1	8.7273	2.4926
65	1	8.7273	2.5979
70	1	8.7273	2.7018
75	1	8.7273	2.8042
80	1	8.7273	2.9051
85	1	8.7273	3.0047
90	1	8.7273	3.1028
95	1	8.7273	3.1996
100	1	8.7273	3.295
0	1	8.798	0
5	1	8.798	1.2268
10	1	8.798	1.3464
15	1	8.798	1.4643
20	1	8.798	1.5805
25	1	8.798	1.6953
30	1	8.798	1.8084
35	1	8.798	1.92
40	1	8.798	2.0301
45	1	8.798	2.1386
50	1	8.798	2.2457
55	1	8.798	2.3514
60	1	8.798	2.4556
65	1	8.798	2.5584
70	1	8.798	2.6597
75	1	8.798	2.7597
80	1	8.798	2.8584
85	1	8.798	2.9557
90	1	8.798	3.0516
95	1	8.798	3.1463
100	1	8.798	3.2397
0	1	8.8687	0
5	1	8.8687	1.2235
10	1	8.8687	1.3396
15	1	8.8687	1.4542
20	1	8.8687	1.5672
25	1	8.8687	1.6788
30	1	8.8687	1.7889
35	1	8.8687	1.8975
40	1	8.8687	2.0047
45	1	8.8687	2.1105
50	1	8.8687	2.2149
55	1	8.8687	2.3179
60	1	8.8687	2.4195
65	1	8.8687	2.5198
70	1	8.8687	2.6188
75	1	8.8687	2.7164
80	1	8.8687	2.8128
85	1	8.8687	2.9079
90	1	8.8687	3.0017
95	1	8.8687	3.0943
100	1	8.8687	3.1856
0	1	8.9394	0
5	1	8.9394	1.2202
10	1	8.9394	1.333
15	1	8.9394	1.4444
20	1	8.9394	1.5543
25	1	8.9394	1.6628
30	1	8.9394	1.7699
35	1	8.9394	1.8757
40	1	8.9394	1.9801
45	1	8.9394	2.0831
50	1	8.9394	2.1848
55	1	8.9394	2.2852
60	1	8.9394	2.3843
65	1	8.9394	2.4822
70	1	8.9394	2.5788
75	1	8.9394	2.6741
80	1	8.9394	2.7682
85	1	8.9394	2.8612
90	1	8.9394	2.9529
95	1	8.9394	3.0434
100	1	8.9394	3.1328
0	1	9.0101	0
5	1	9.0101	1.2171
10	1	9.0101	1.3267
15	1	9.0101	1.4349
20	1	9.0101	1.5418
25	1	9.0101	1.6473
30	1	9.0101	1.7515
35	1	9.0101	1.8544
40	1	9.0101	1.9561
45	1	9.0101	2.0564
50	1	9.0101	2.1556
55	1	9.0101	2.2534
60	1	9.0101	2.3501
65	1	9.0101	2.4455
70	1	9.0101	2.5398
75	1	9.0101	2.6329
80	1	9.0101	2.7248
85	1	9.0101	2.8156
90	1	9.0101	2.9052
95	1	9.0101	2.9938
100	1	9.0101	3.0812
0	1	9.0808	0
5	1	9.0808	1.214
10	1	9.0808	1.3205
15	1	9.0808	1.4257
20	1	9.0808	1.5296
25	1	9.0808	1.6322
30	1	9.0808	1.7336
35	1	9.0808	1.8338
40	1	9.0808	1.9327
45	1	9.0808	2.0305
50	1	9.0808	2.1271
55	1	9.0808	2.2225
60	1	9.0808	2.3167
65	1	9.0808	2.4098
70	1	9.0808	2.5018
75	1	9.0808	2.5927
80	1	9.0808	2.6824
85	1	9.0808	2.7711
90	1	9.0808	2.8587
95	1	9.0808	2.9453
100	1	9.0808	3.0307
0	1	9.1515	0
5	1	9.1515	1.211
10	1	9.1515	1.3145
15	1	9.1515	1.4167
20	1	9.1515	1.5177
25	1	9.1515	1.6175
30	1	9.1515	1.7162
35	1	9.1515	1.8137
40	1	9.1515	1.91
45	1	9.1515	2.0053
50	1	9.1515	2.0993
55	1	9.1515	2.1923
60	1	9.1515	2.2842
65	1	9.1515	2.375
70	1	9.1515	2.4648
75	1	9.1515	2.5535
80	1	9.1515	2.6411
85	1	9.1515	2.7277
90	1	9.1515	2.8133
95	1	9.1515	2.8979
100	1	9.1515	2.9815
0	1	9.2222	0
5	1	9.2222	1.2081
10	1	9.2222	1.3086
15	1	9.2222	1.408
20	1	9.2222	1.5062
25	1	9.2222	1.6033
30	1	9.2222	1.6993
35	1	9.2222	1.7942
40	1	9.2222	1.888
45	1	9.2222	1.9807
50	1	9.2222	2.0724
55	1	9.2222	2.163
60	1	9.2222	2.2526
65	1	9.2222	2.3411
70	1	9.2222	2.4287
75	1	9.2222	2.5152
80	1	9.2222	2.6008
85	1	9.2222	2.6854
90	1	9.2222	2.769
95	1	9.2222	2.8516
100	1	9.2222	2.9334
0	1	9.2929	0
5	1	9.2929	1.2053
10	1	9.2929	1.3029
15	1	9.2929	1.3995
20	1	9.2929	1.495
25	1	9.2929	1.5894
30	1	9.2929	1.6828
35	1	9.2929	1.7752
40	1	9.2929	1.8665
45	1	9.2929	1.9568
50	1	9.2929	2.0461
55	1	9.2929	2.1344
60	1	9.2929	2.2217
65	1	9.2929	2.3081
70	1	9.2929	2.3935
75	1	9.2929	2.478
80	1	9.2929	2.5615
85	1	9.2929	2.6441
90	1	9.2929	2.7257
95	1	9.2929	2.8065
100	1	9.2929	2.8864
0	1	9.3636	0
5	1	9.3636	1.2025
10	1	9.3636	1.2974
15	1	9.3636	1.3913
20	1	9.3636	1.4841
25	1	9.3636	1.5759
30	1	9.3636	1.6668
35	1	9.3636	1.7567
40	1	9.3636	1.8456
45	1	9.3636	1.9335
50	1	9.3636	2.0205
55	1	9.3636	2.1066
60	1	9.3636	2.1917
65	1	9.3636	2.2759
70	1	9.3636	2.3592
75	1	9.3636	2.4416
80	1	9.3636	2.5231
85	1	9.3636	2.6038
90	1	9.3636	2.6835
95	1	9.3636	2.7625
100	1	9.3636	2.8405
0	1	9.4343	0
5	1	9.4343	1.1998
10	1	9.4343	1.292
15	1	9.4343	1.3833
20	1	9.4343	1.4735
25	1	9.4343	1.5629
30	1	9.4343	1.6513
35	1	9.4343	1.7387
40	1	9.4343	1.8253
45	1	9.4343	1.9109
50	1	9.4343	1.9957
55	1	9.4343	2.0795
60	1	9.4343	2.1625
65	1	9.4343	2.2446
70	1	9.4343	2.3259
75	1	9.4343	2.4062
80	1	9.4343	2.4858
85	1	9.4343	2.5645
90	1	9.4343	2.6424
95	1	9.4343	2.7195
100	1	9.4343	2.7958
0	1	9.5051	0
5	1	9.5051	1.1972
10	1	9.5051	1.2868
15	1	9.5051	1.3755
20	1	9.5051	1.4633
25	1	9.5051	1.5501
30	1	9.5051	1.6361
35	1	9.5051	1.7212
40	1	9.5051	1.8055
45	1	9.5051	1.8889
50	1	9.5051	1.9714
55	1	9.5051	2.0531
60	1	9.5051	2.134
65	1	9.5051	2.2141
70	1	9.5051	2.2933
75	1	9.5051	2.3717
80	1	9.5051	2.4494
85	1	9.5051	2.5262
90	1	9.5051	2.6023
95	1	9.5051	2.6775
100	1	9.5051	2.7521
0	1	9.5758	0
5	1	9.5758	1.1947
10	1	9.5758	1.2818
15	1	9.5758	1.3679
20	1	9.5758	1.4533
25	1	9.5758	1.5378
30	1	9.5758	1.6214
35	1	9.5758	1.7043
40	1	9.5758	1.7863
45	1	9.5758	1.8675
50	1	9.5758	1.9479
55	1	9.5758	2.0275
60	1	9.5758	2.1063
65	1	9.5758	2.1843
70	1	9.5758	2.2616
75	1	9.5758	2.3381
80	1	9.5758	2.4138
85	1	9.5758	2.4888
90	1	9.5758	2.5631
95	1	9.5758	2.6366
100	1	9.5758	2.7094
0	1	9.6465	0
5	1	9.6465	1.1922
10	1	9.6465	1.2768
15	1	9.6465	1.3606
20	1	9.6465	1.4436
25	1	9.6465	1.5258
30	1	9.6465	1.6071
35	1	9.6465	1.6878
40	1	9.6465	1.7676
45	1	9.6465	1.8466
50	1	9.6465	1.9249
55	1	9.6465	2.0025
60	1	9.6465	2.0793
65	1	9.6465	2.1554
70	1	9.6465	2.2307
75	1	9.6465	2.3053
80	1	9.6465	2.3792
85	1	9.6465	2.4524
90	1	9.6465	2.5249
95	1	9.6465	2.5967
100	1	9.6465	2.6678
0	1	9.7172	0
5	1	9.7172	1.1899
10	1	9.7172	1.2721
15	1	9.7172	1.3535
[truncated: 207,896+ more rows]

## Sheet: kinetics_with_oscillations
time	[Pd(II)]0	k1	[P]t
0	0.01	0.01	0
5	0.01	0.01	0.0061452
10	0.01	0.01	0.024158
15	0.01	0.01	0.053397
20	0.01	0.01	0.093217
25	0.01	0.01	0.14297
30	0.01	0.01	0.20202
35	0.01	0.01	0.26974
40	0.01	0.01	0.34549
45	0.01	0.01	0.42868
50	0.01	0.01	0.51871
55	0.01	0.01	0.61502
60	0.01	0.01	0.71705
65	0.01	0.01	0.82426
70	0.01	0.01	0.93616
75	0.01	0.01	1.0522
80	0.01	0.01	1.1721
85	0.01	0.01	1.2952
90	0.01	0.01	1.4211
95	0.01	0.01	1.5496
100	0.01	0.01	1.6801
0	0.01	0.021818	0
5	0.01	0.021818	0.013145
10	0.01	0.021818	0.050657
15	0.01	0.021818	0.10976
20	0.01	0.021818	0.18784
25	0.01	0.021818	0.28247
30	0.01	0.021818	0.3914
35	0.01	0.021818	0.51257
40	0.01	0.021818	0.64413
45	0.01	0.021818	0.78438
50	0.01	0.021818	0.93181
55	0.01	0.021818	1.0851
60	0.01	0.021818	1.2429
65	0.01	0.021818	1.4043
70	0.01	0.021818	1.5683
75	0.01	0.021818	1.7341
80	0.01	0.021818	1.9009
85	0.01	0.021818	2.0682
90	0.01	0.021818	2.2353
95	0.01	0.021818	2.4018
100	0.01	0.021818	2.5673
0	0.01	0.025758	0
5	0.01	0.025758	0.015417
10	0.01	0.025758	0.059029
15	0.01	0.025758	0.12708
20	0.01	0.025758	0.21613
25	0.01	0.025758	0.32303
30	0.01	0.025758	0.44496
35	0.01	0.025758	0.57939
40	0.01	0.025758	0.72407
45	0.01	0.025758	0.87704
50	0.01	0.025758	1.0366
55	0.01	0.025758	1.2011
60	0.01	0.025758	1.3694
65	0.01	0.025758	1.5403
70	0.01	0.025758	1.7128
75	0.01	0.025758	1.8861
80	0.01	0.025758	2.0595
85	0.01	0.025758	2.2324
90	0.01	0.025758	2.4042
95	0.01	0.025758	2.5746
100	0.01	0.025758	2.7432
0	0.01	0.029697	0
5	0.01	0.029697	0.017659
10	0.01	0.029697	0.067181
15	0.01	0.029697	0.14373
20	0.01	0.029697	0.24296
25	0.01	0.029697	0.36101
30	0.01	0.029697	0.49446
35	0.01	0.029697	0.64037
40	0.01	0.029697	0.79614
45	0.01	0.029697	0.95958
50	0.01	0.029697	1.1288
55	0.01	0.029697	1.3022
60	0.01	0.029697	1.4783
65	0.01	0.029697	1.6562
70	0.01	0.029697	1.8347
75	0.01	0.029697	2.0131
80	0.01	0.029697	2.1908
85	0.01	0.029697	2.3671
90	0.01	0.029697	2.5417
95	0.01	0.029697	2.7142
100	0.01	0.029697	2.8842
0	0.01	0.041515	0
5	0.01	0.041515	0.024212
10	0.01	0.041515	0.090389
15	0.01	0.041515	0.18992
20	0.01	0.041515	0.31554
25	0.01	0.041515	0.46124
30	0.01	0.041515	0.62206
35	0.01	0.041515	0.79398
40	0.01	0.041515	0.97375
45	0.01	0.041515	1.1588
50	0.01	0.041515	1.3469
55	0.01	0.041515	1.5366
60	0.01	0.041515	1.7266
65	0.01	0.041515	1.9158
70	0.01	0.041515	2.1034
75	0.01	0.041515	2.2888
80	0.01	0.041515	2.4717
85	0.01	0.041515	2.6515
90	0.01	0.041515	2.8282
95	0.01	0.041515	3.0015
100	0.01	0.041515	3.1713
0	0.01	0.045455	0
5	0.01	0.045455	0.026339
10	0.01	0.045455	0.097729
15	0.01	0.045455	0.20415
20	0.01	0.045455	0.33736
25	0.01	0.045455	0.49064
30	0.01	0.045455	0.65861
35	0.01	0.045455	0.837
40	0.01	0.045455	1.0224
45	0.01	0.045455	1.2122
50	0.01	0.045455	1.4044
55	0.01	0.045455	1.5973
60	0.01	0.045455	1.7897
65	0.01	0.045455	1.9807
70	0.01	0.045455	2.1696
75	0.01	0.045455	2.3558
80	0.01	0.045455	2.539
85	0.01	0.045455	2.7189
90	0.01	0.045455	2.8954
95	0.01	0.045455	3.0682
100	0.01	0.045455	3.2373
0	0.01	0.049394	0
5	0.01	0.049394	0.028439
10	0.01	0.049394	0.10488
15	0.01	0.049394	0.21785
20	0.01	0.049394	0.3581
25	0.01	0.049394	0.51826
30	0.01	0.049394	0.69259
35	0.01	0.049394	0.87658
40	0.01	0.049394	1.0668
45	0.01	0.049394	1.2605
50	0.01	0.049394	1.4558
55	0.01	0.049394	1.6512
60	0.01	0.049394	1.8454
65	0.01	0.049394	2.0376
70	0.01	0.049394	2.2273
75	0.01	0.049394	2.4139
80	0.01	0.049394	2.5971
85	0.01	0.049394	2.7768
90	0.01	0.049394	2.9528
95	0.01	0.049394	3.125
100	0.01	0.049394	3.2934
0	0.01	0.053333	0
5	0.01	0.053333	0.030511
10	0.01	0.053333	0.11185
15	0.01	0.053333	0.23104
20	0.01	0.053333	0.37782
25	0.01	0.053333	0.54425
30	0.01	0.053333	0.72421
35	0.01	0.053333	0.91306
40	0.01	0.053333	1.1073
45	0.01	0.053333	1.3043
50	0.01	0.053333	1.5021
55	0.01	0.053333	1.6992
60	0.01	0.053333	1.8947
65	0.01	0.053333	2.0878
70	0.01	0.053333	2.2778
75	0.01	0.053333	2.4645
80	0.01	0.053333	2.6476
85	0.01	0.053333	2.827
90	0.01	0.053333	3.0024
95	0.01	0.053333	3.174
100	0.01	0.053333	3.3416
0	0.01	0.057273	0
5	0.01	0.057273	0.032557
10	0.01	0.057273	0.11864
15	0.01	0.057273	0.24373
20	0.01	0.057273	0.39659
25	0.01	0.057273	0.56871
30	0.01	0.057273	0.75368
35	0.01	0.057273	0.94674
40	0.01	0.057273	1.1444
45	0.01	0.057273	1.344
50	0.01	0.057273	1.5438
55	0.01	0.057273	1.7423
60	0.01	0.057273	1.9387
65	0.01	0.057273	2.1322
70	0.01	0.057273	2.3224
75	0.01	0.057273	2.509
80	0.01	0.057273	2.6918
85	0.01	0.057273	2.8707
90	0.01	0.057273	3.0455
95	0.01	0.057273	3.2164
100	0.01	0.057273	3.3832
0	0.01	0.061212	0
5	0.01	0.061212	0.034576
10	0.01	0.061212	0.12526
15	0.01	0.061212	0.25595
20	0.01	0.061212	0.41447
25	0.01	0.061212	0.59176
30	0.01	0.061212	0.78117
35	0.01	0.061212	0.97786
40	0.01	0.061212	1.1783
45	0.01	0.061212	1.3801
50	0.01	0.061212	1.5814
55	0.01	0.061212	1.781
60	0.01	0.061212	1.978
65	0.01	0.061212	2.1717
70	0.01	0.061212	2.3619
75	0.01	0.061212	2.5483
80	0.01	0.061212	2.7307
85	0.01	0.061212	2.909
90	0.01	0.061212	3.0833
95	0.01	0.061212	3.2535
100	0.01	0.061212	3.4196
0	0.01	0.065152	0
5	0.01	0.065152	0.036569
10	0.01	0.065152	0.13172
15	0.01	0.065152	0.26772
20	0.01	0.065152	0.43149
25	0.01	0.065152	0.61348
30	0.01	0.065152	0.80684
35	0.01	0.065152	1.0067
40	0.01	0.065152	1.2096
45	0.01	0.065152	1.4131
50	0.01	0.065152	1.6156
55	0.01	0.065152	1.8159
60	0.01	0.065152	2.0132
65	0.01	0.065152	2.2071
70	0.01	0.065152	2.3971
75	0.01	0.065152	2.5832
80	0.01	0.065152	2.7651
85	0.01	0.065152	2.9429
90	0.01	0.065152	3.1166
95	0.01	0.065152	3.2861
100	0.01	0.065152	3.4516
0	0.01	0.069091	0
5	0.01	0.069091	0.038536
10	0.01	0.069091	0.13801
15	0.01	0.069091	0.27907
20	0.01	0.069091	0.44772
25	0.01	0.069091	0.63398
30	0.01	0.069091	0.83083
35	0.01	0.069091	1.0334
40	0.01	0.069091	1.2383
45	0.01	0.069091	1.4432
50	0.01	0.069091	1.6466
55	0.01	0.069091	1.8474
60	0.01	0.069091	2.0449
65	0.01	0.069091	2.2388
70	0.01	0.069091	2.4286
75	0.01	0.069091	2.6143
80	0.01	0.069091	2.7958
85	0.01	0.069091	2.9731
90	0.01	0.069091	3.1461
95	0.01	0.069091	3.3151
100	0.01	0.069091	3.4799
0	0.01	0.080909	0
5	0.01	0.080909	0.044288
10	0.01	0.080909	0.15596
15	0.01	0.080909	0.3107
20	0.01	0.080909	0.49202
25	0.01	0.080909	0.6889
30	0.01	0.080909	0.89405
35	0.01	0.080909	1.1027
40	0.01	0.080909	1.3119
45	0.01	0.080909	1.5196
50	0.01	0.080909	1.7245
55	0.01	0.080909	1.9259
60	0.01	0.080909	2.1234
65	0.01	0.080909	2.3166
70	0.01	0.080909	2.5055
75	0.01	0.080909	2.69
80	0.01	0.080909	2.8702
85	0.01	0.080909	3.046
90	0.01	0.080909	3.2175
95	0.01	0.080909	3.3849
100	0.01	0.080909	3.5482
0	0.01	0.084848	0
5	0.01	0.084848	0.046157
10	0.01	0.084848	0.16164
15	0.01	0.084848	0.3205
20	0.01	0.084848	0.50547
25	0.01	0.084848	0.70526
30	0.01	0.084848	0.91258
35	0.01	0.084848	1.1228
40	0.01	0.084848	1.3329
45	0.01	0.084848	1.5411
50	0.01	0.084848	1.7463
55	0.01	0.084848	1.9477
60	0.01	0.084848	2.145
65	0.01	0.084848	2.338
70	0.01	0.084848	2.5265
75	0.01	0.084848	2.7107
80	0.01	0.084848	2.8904
85	0.01	0.084848	3.0658
90	0.01	0.084848	3.2369
95	0.01	0.084848	3.4038
100	0.01	0.084848	3.5666
0	0.01	0.088788	0
5	0.01	0.088788	0.048001
10	0.01	0.088788	0.16719
15	0.01	0.088788	0.32996
20	0.01	0.088788	0.51831
25	0.01	0.088788	0.72075
30	0.01	0.088788	0.92998
35	0.01	0.088788	1.1415
40	0.01	0.088788	1.3524
45	0.01	0.088788	1.561
50	0.01	0.088788	1.7663
55	0.01	0.088788	1.9677
60	0.01	0.088788	2.1648
65	0.01	0.088788	2.3575
70	0.01	0.088788	2.5457
75	0.01	0.088788	2.7295
80	0.01	0.088788	2.9088
85	0.01	0.088788	3.0838
90	0.01	0.088788	3.2545
95	0.01	0.088788	3.421
100	0.01	0.088788	3.5834
0	0.01	0.092727	0
5	0.01	0.092727	0.049822
10	0.01	0.092727	0.17261
15	0.01	0.092727	0.33909
20	0.01	0.092727	0.53059
25	0.01	0.092727	0.73542
30	0.01	0.092727	0.94635
35	0.01	0.092727	1.1589
40	0.01	0.092727	1.3705
45	0.01	0.092727	1.5794
50	0.01	0.092727	1.7848
55	0.01	0.092727	1.9861
60	0.01	0.092727	2.183
65	0.01	0.092727	2.3754
70	0.01	0.092727	2.5633
75	0.01	0.092727	2.7467
80	0.01	0.092727	2.9256
85	0.01	0.092727	3.1002
90	0.01	0.092727	3.2705
95	0.01	0.092727	3.4367
100	0.01	0.092727	3.5987
0	0.01	0.096667	0
5	0.01	0.096667	0.05162
10	0.01	0.096667	0.17789
15	0.01	0.096667	0.34789
20	0.01	0.096667	0.54232
25	0.01	0.096667	0.74934
30	0.01	0.096667	0.96177
35	0.01	0.096667	1.1753
40	0.01	0.096667	1.3874
45	0.01	0.096667	1.5966
50	0.01	0.096667	1.8019
55	0.01	0.096667	2.0031
60	0.01	0.096667	2.1998
65	0.01	0.096667	2.3919
70	0.01	0.096667	2.5795
75	0.01	0.096667	2.7625
80	0.01	0.096667	2.9411
85	0.01	0.096667	3.1153
90	0.01	0.096667	3.2853
95	0.01	0.096667	3.451
100	0.01	0.096667	3.6127
0	0.01	0.10061	0
5	0.01	0.10061	0.053395
10	0.01	0.10061	0.18304
15	0.01	0.10061	0.3564
20	0.01	0.10061	0.55355
25	0.01	0.10061	0.76255
30	0.01	0.10061	0.9763
35	0.01	0.10061	1.1906
40	0.01	0.10061	1.4032
45	0.01	0.10061	1.6125
50	0.01	0.10061	1.8178
55	0.01	0.10061	2.0188
60	0.01	0.10061	2.2153
65	0.01	0.10061	2.4071
70	0.01	0.10061	2.5944
75	0.01	0.10061	2.7771
80	0.01	0.10061	2.9553
85	0.01	0.10061	3.1292
90	0.01	0.10061	3.2988
95	0.01	0.10061	3.4643
100	0.01	0.10061	3.6256
0	0.01	0.10455	0
5	0.01	0.10455	0.055148
10	0.01	0.10455	0.18807
15	0.01	0.10455	0.36461
20	0.01	0.10455	0.56429
25	0.01	0.10455	0.77509
30	0.01	0.10455	0.99001
35	0.01	0.10455	1.205
40	0.01	0.10455	1.4179
45	0.01	0.10455	1.6273
50	0.01	0.10455	1.8326
55	0.01	0.10455	2.0334
60	0.01	0.10455	2.2296
65	0.01	0.10455	2.4212
70	0.01	0.10455	2.6081
75	0.01	0.10455	2.7905
80	0.01	0.10455	2.9685
85	0.01	0.10455	3.1421
90	0.01	0.10455	3.3114
95	0.01	0.10455	3.4765
100	0.01	0.10455	3.6376
0	0.01	0.10848	0
5	0.01	0.10848	0.056878
10	0.01	0.10848	0.19298
15	0.01	0.10848	0.37254
20	0.01	0.10848	0.57458
25	0.01	0.10848	0.78701
30	0.01	0.10848	1.003
35	0.01	0.10848	1.2186
40	0.01	0.10848	1.4317
45	0.01	0.10848	1.6411
50	0.01	0.10848	1.8463
55	0.01	0.10848	2.0469
60	0.01	0.10848	2.2429
65	0.01	0.10848	2.4342
70	0.01	0.10848	2.6209
75	0.01	0.10848	2.803
80	0.01	0.10848	2.9807
85	0.01	0.10848	3.154
90	0.01	0.10848	3.323
95	0.01	0.10848	3.4878
100	0.01	0.10848	3.6486
0	0.01	0.11242	0
5	0.01	0.11242	0.058587
10	0.01	0.11242	0.19777
15	0.01	0.11242	0.3802
20	0.01	0.11242	0.58443
25	0.01	0.11242	0.79834
30	0.01	0.11242	1.0152
35	0.01	0.11242	1.2313
40	0.01	0.11242	1.4446
45	0.01	0.11242	1.654
50	0.01	0.11242	1.8591
55	0.01	0.11242	2.0596
60	0.01	0.11242	2.2553
65	0.01	0.11242	2.4464
70	0.01	0.11242	2.6328
75	0.01	0.11242	2.8146
80	0.01	0.11242	2.992
85	0.01	0.11242	3.165
90	0.01	0.11242	3.3337
95	0.01	0.11242	3.4983
100	0.01	0.11242	3.6588
0	0.01	0.11636	0
5	0.01	0.11636	0.060274
10	0.01	0.11636	0.20245
15	0.01	0.11636	0.38761
20	0.01	0.11636	0.59387
25	0.01	0.11636	0.80913
30	0.01	0.11636	1.0268
35	0.01	0.11636	1.2433
40	0.01	0.11636	1.4567
45	0.01	0.11636	1.6661
50	0.01	0.11636	1.8711
55	0.01	0.11636	2.0713
60	0.01	0.11636	2.2669
65	0.01	0.11636	2.4577
70	0.01	0.11636	2.6438
75	0.01	0.11636	2.8254
80	0.01	0.11636	3.0025
85	0.01	0.11636	3.1753
90	0.01	0.11636	3.3438
95	0.01	0.11636	3.5081
100	0.01	0.11636	3.6684
0	0.01	0.1203	0
5	0.01	0.1203	0.06194
10	0.01	0.1203	0.20701
15	0.01	0.1203	0.39477
20	0.01	0.1203	0.60292
25	0.01	0.1203	0.81939
30	0.01	0.1203	1.0377
35	0.01	0.1203	1.2546
40	0.01	0.1203	1.4681
45	0.01	0.1203	1.6775
50	0.01	0.1203	1.8823
55	0.01	0.1203	2.0824
60	0.01	0.1203	2.2777
65	0.01	0.1203	2.4682
70	0.01	0.1203	2.6541
75	0.01	0.1203	2.8355
80	0.01	0.1203	3.0123
85	0.01	0.1203	3.1849
90	0.01	0.1203	3.3531
95	0.01	0.1203	3.5172
100	0.01	0.1203	3.6773
0	0.01	0.12424	0
5	0.01	0.12424	0.063586
10	0.01	0.12424	0.21147
15	0.01	0.12424	0.40169
20	0.01	0.12424	0.6116
25	0.01	0.12424	0.82918
30	0.01	0.12424	1.0481
35	0.01	0.12424	1.2653
40	0.01	0.12424	1.4789
45	0.01	0.12424	1.6882
50	0.01	0.12424	1.8928
55	0.01	0.12424	2.0927
60	0.01	0.12424	2.2878
65	0.01	0.12424	2.4781
70	0.01	0.12424	2.6638
75	0.01	0.12424	2.8449
80	0.01	0.12424	3.0215
85	0.01	0.12424	3.1938
90	0.01	0.12424	3.3619
95	0.01	0.12424	3.5258
100	0.01	0.12424	3.6856
0	0.01	0.12818	0
5	0.01	0.12818	0.06521
10	0.01	0.12818	0.21582
15	0.01	0.12818	0.40839
20	0.01	0.12818	0.61993
25	0.01	0.12818	0.8385
30	0.01	0.12818	1.058
35	0.01	0.12818	1.2753
40	0.01	0.12818	1.489
45	0.01	0.12818	1.6982
50	0.01	0.12818	1.9027
55	0.01	0.12818	2.1024
60	0.01	0.12818	2.2973
65	0.01	0.12818	2.4874
70	0.01	0.12818	2.6728
75	0.01	0.12818	2.8537
80	0.01	0.12818	3.0302
85	0.01	0.12818	3.2022
90	0.01	0.12818	3.3701
95	0.01	0.12818	3.5338
100	0.01	0.12818	3.6934
0	0.01	0.13212	0
5	0.01	0.13212	0.066814
10	0.01	0.13212	0.22007
15	0.01	0.13212	0.41486
20	0.01	0.13212	0.62792
25	0.01	0.13212	0.8474
30	0.01	0.13212	1.0674
35	0.01	0.13212	1.2849
40	0.01	0.13212	1.4985
45	0.01	0.13212	1.7077
50	0.01	0.13212	1.912
55	0.01	0.13212	2.1115
60	0.01	0.13212	2.3062
65	0.01	0.13212	2.4961
70	0.01	0.13212	2.6813
75	0.01	0.13212	2.862
80	0.01	0.13212	3.0383
85	0.01	0.13212	3.2101
90	0.01	0.13212	3.3778
95	0.01	0.13212	3.5413
100	0.01	0.13212	3.7007
0	0.01	0.13606	0
5	0.01	0.13606	0.068399
10	0.01	0.13606	0.22423
15	0.01	0.13606	0.42113
20	0.01	0.13606	0.6356
25	0.01	0.13606	0.8559
30	0.01	0.13606	1.0763
35	0.01	0.13606	1.2939
40	0.01	0.13606	1.5076
45	0.01	0.13606	1.7166
50	0.01	0.13606	1.9208
55	0.01	0.13606	2.1201
60	0.01	0.13606	2.3146
65	0.01	0.13606	2.5043
70	0.01	0.13606	2.6894
75	0.01	0.13606	2.8698
80	0.01	0.13606	3.0459
85	0.01	0.13606	3.2176
90	0.01	0.13606	3.385
95	0.01	0.13606	3.5484
100	0.01	0.13606	3.7076
0	0.01	0.14	0
5	0.01	0.14	0.069963
10	0.01	0.14	0.22828
15	0.01	0.14	0.4272
20	0.01	0.14	0.64297
25	0.01	0.14	0.86402
30	0.01	0.14	1.0847
35	0.01	0.14	1.3025
40	0.01	0.14	1.5161
45	0.01	0.14	1.725
50	0.01	0.14	1.9291
55	0.01	0.14	2.1282
60	0.01	0.14	2.3225
65	0.01	0.14	2.512
70	0.01	0.14	2.6969
75	0.01	0.14	2.8772
80	0.01	0.14	3.0531
85	0.01	0.14	3.2246
90	0.01	0.14	3.3919
95	0.01	0.14	3.555
100	0.01	0.14	3.7141
0	0.01	0.14394	0
5	0.01	0.14394	0.071508
10	0.01	0.14394	0.23224
15	0.01	0.14394	0.43307
20	0.01	0.14394	0.65006
25	0.01	0.14394	0.87177
30	0.01	0.14394	1.0928
35	0.01	0.14394	1.3107
40	0.01	0.14394	1.5242
45	0.01	0.14394	1.733
50	0.01	0.14394	1.9369
55	0.01	0.14394	2.1359
60	0.01	0.14394	2.33
65	0.01	0.14394	2.5193
70	0.01	0.14394	2.704
75	0.01	0.14394	2.8842
80	0.01	0.14394	3.0599
85	0.01	0.14394	3.2312
90	0.01	0.14394	3.3983
95	0.01	0.14394	3.5613
100	0.01	0.14394	3.7203
0	0.01	0.14788	0
5	0.01	0.14788	0.073034
10	0.01	0.14788	0.23611
15	0.01	0.14788	0.43876
20	0.01	0.14788	0.65688
25	0.01	0.14788	0.87919
30	0.01	0.14788	1.1005
35	0.01	0.14788	1.3184
40	0.01	0.14788	1.5319
45	0.01	0.14788	1.7406
50	0.01	0.14788	1.9443
55	0.01	0.14788	2.1431
60	0.01	0.14788	2.3371
65	0.01	0.14788	2.5263
70	0.01	0.14788	2.7108
75	0.01	0.14788	2.8907
80	0.01	0.14788	3.0663
85	0.01	0.14788	3.2375
90	0.01	0.14788	3.4044
95	0.01	0.14788	3.5673
100	0.01	0.14788	3.7261
0	0.01	0.15182	0
5	0.01	0.15182	0.074541
10	0.01	0.15182	0.2399
15	0.01	0.15182	0.44427
20	0.01	0.15182	0.66344
25	0.01	0.15182	0.8863
30	0.01	0.15182	1.1078
35	0.01	0.15182	1.3258
40	0.01	0.15182	1.5392
45	0.01	0.15182	1.7478
50	0.01	0.15182	1.9514
55	0.01	0.15182	2.15
60	0.01	0.15182	2.3438
65	0.01	0.15182	2.5328
70	0.01	0.15182	2.7172
75	0.01	0.15182	2.897
80	0.01	0.15182	3.0724
85	0.01	0.15182	3.2434
90	0.01	0.15182	3.4102
95	0.01	0.15182	3.5729
100	0.01	0.15182	3.7316
0	0.01	0.15576	0
5	0.01	0.15576	0.07603
10	0.01	0.15576	0.24359
15	0.01	0.15576	0.4496
20	0.01	0.15576	0.66975
25	0.01	0.15576	0.8931
30	0.01	0.15576	1.1148
35	0.01	0.15576	1.3328
40	0.01	0.15576	1.5461
45	0.01	0.15576	1.7546
50	0.01	0.15576	1.958
55	0.01	0.15576	2.1565
60	0.01	0.15576	2.3502
65	0.01	0.15576	2.539
70	0.01	0.15576	2.7232
75	0.01	0.15576	2.9029
80	0.01	0.15576	3.0781
85	0.01	0.15576	3.249
90	0.01	0.15576	3.4157
95	0.01	0.15576	3.5783
100	0.01	0.15576	3.7368
0	0.01	0.1597	0
5	0.01	0.1597	0.0775
10	0.01	0.1597	0.2472
15	0.01	0.1597	0.45477
20	0.01	0.1597	0.67583
25	0.01	0.1597	0.89962
30	0.01	0.1597	1.1215
35	0.01	0.1597	1.3395
40	0.01	0.1597	1.5527
45	0.01	0.1597	1.7611
50	0.01	0.1597	1.9644
55	0.01	0.1597	2.1627
60	0.01	0.1597	2.3562
65	0.01	0.1597	2.5449
70	0.01	0.1597	2.729
75	0.01	0.1597	2.9085
80	0.01	0.1597	3.0836
85	0.01	0.1597	3.2544
90	0.01	0.1597	3.4209
95	0.01	0.1597	3.5833
100	0.01	0.1597	3.7418
0	0.01	0.16364	0
5	0.01	0.16364	0.078952
10	0.01	0.16364	0.25074
15	0.01	0.16364	0.45979
20	0.01	0.16364	0.68168
25	0.01	0.16364	0.90586
30	0.01	0.16364	1.1279
35	0.01	0.16364	1.3458
40	0.01	0.16364	1.559
45	0.01	0.16364	1.7672
50	0.01	0.16364	1.9704
55	0.01	0.16364	2.1686
60	0.01	0.16364	2.362
65	0.01	0.16364	2.5505
70	0.01	0.16364	2.7345
75	0.01	0.16364	2.9139
80	0.01	0.16364	3.0888
85	0.01	0.16364	3.2594
90	0.01	0.16364	3.4259
95	0.01	0.16364	3.5882
100	0.01	0.16364	3.7465
0	0.01	0.16758	0
5	0.01	0.16758	0.080387
10	0.01	0.16758	0.25419
15	0.01	0.16758	0.46465
20	0.01	0.16758	0.68732
25	0.01	0.16758	0.91186
30	0.01	0.16758	1.134
35	0.01	0.16758	1.3519
40	0.01	0.16758	1.565
45	0.01	0.16758	1.7731
50	0.01	0.16758	1.9762
55	0.01	0.16758	2.1742
60	0.01	0.16758	2.3675
65	0.01	0.16758	2.5559
70	0.01	0.16758	2.7397
75	0.01	0.16758	2.9189
80	0.01	0.16758	3.0938
85	0.01	0.16758	3.2643
90	0.01	0.16758	3.4306
95	0.01	0.16758	3.5928
100	0.01	0.16758	3.751
0	0.01	0.17152	0
5	0.01	0.17152	0.081804
10	0.01	0.17152	0.25756
15	0.01	0.17152	0.46936
20	0.01	0.17152	0.69275
25	0.01	0.17152	0.91762
30	0.01	0.17152	1.1398
35	0.01	0.17152	1.3577
40	0.01	0.17152	1.5708
45	0.01	0.17152	1.7787
50	0.01	0.17152	1.9817
55	0.01	0.17152	2.1796
60	0.01	0.17152	2.3727
65	0.01	0.17152	2.561
70	0.01	0.17152	2.7447
75	0.01	0.17152	2.9238
80	0.01	0.17152	3.0985
85	0.01	0.17152	3.2689
90	0.01	0.17152	3.4351
95	0.01	0.17152	3.5972
100	0.01	0.17152	3.7553
0	0.01	0.17545	0
5	0.01	0.17545	0.083203
10	0.01	0.17545	0.26086
15	0.01	0.17545	0.47393
20	0.01	0.17545	0.698
25	0.01	0.17545	0.92314
30	0.01	0.17545	1.1454
35	0.01	0.17545	1.3633
40	0.01	0.17545	1.5762
45	0.01	0.17545	1.7841
50	0.01	0.17545	1.9869
55	0.01	0.17545	2.1847
60	0.01	0.17545	2.3777
65	0.01	0.17545	2.5659
70	0.01	0.17545	2.7494
75	0.01	0.17545	2.9284
80	0.01	0.17545	3.103
85	0.01	0.17545	3.2733
90	0.01	0.17545	3.4394
95	0.01	0.17545	3.6014
100	0.01	0.17545	3.7593
0	0.01	0.17939	0
5	0.01	0.17939	0.084585
10	0.01	0.17939	0.26409
15	0.01	0.17939	0.47837
20	0.01	0.17939	0.70305
25	0.01	0.17939	0.92846
30	0.01	0.17939	1.1508
35	0.01	0.17939	1.3686
40	0.01	0.17939	1.5815
45	0.01	0.17939	1.7892
50	0.01	0.17939	1.9919
55	0.01	0.17939	2.1896
60	0.01	0.17939	2.3824
65	0.01	0.17939	2.5705
70	0.01	0.17939	2.7539
75	0.01	0.17939	2.9328
80	0.01	0.17939	3.1073
85	0.01	0.17939	3.2775
90	0.01	0.17939	3.4435
95	0.01	0.17939	3.6054
100	0.01	0.17939	3.7633
0	0.01	0.18333	0
5	0.01	0.18333	0.085951
10	0.01	0.18333	0.26724
15	0.01	0.18333	0.48267
20	0.01	0.18333	0.70794
25	0.01	0.18333	0.93356
30	0.01	0.18333	1.1559
35	0.01	0.18333	1.3737
40	0.01	0.18333	1.5865
45	0.01	0.18333	1.7941
50	0.01	0.18333	1.9967
55	0.01	0.18333	2.1943
60	0.01	0.18333	2.387
65	0.01	0.18333	2.575
70	0.01	0.18333	2.7583
75	0.01	0.18333	2.9371
80	0.01	0.18333	3.1115
85	0.01	0.18333	3.2815
90	0.01	0.18333	3.4474
95	0.01	0.18333	3.6092
100	0.01	0.18333	3.767
0	0.01	0.18727	0
5	0.01	0.18727	0.0873
10	0.01	0.18727	0.27033
15	0.01	0.18727	0.48685
20	0.01	0.18727	0.71265
25	0.01	0.18727	0.93848
30	0.01	0.18727	1.1609
35	0.01	0.18727	1.3786
40	0.01	0.18727	1.5913
45	0.01	0.18727	1.7988
50	0.01	0.18727	2.0013
55	0.01	0.18727	2.1988
60	0.01	0.18727	2.3914
65	0.01	0.18727	2.5792
70	0.01	0.18727	2.7624
75	0.01	0.18727	2.9411
80	0.01	0.18727	3.1154
85	0.01	0.18727	3.2854
90	0.01	0.18727	3.4512
95	0.01	0.18727	3.6129
100	0.01	0.18727	3.7706
0	0.01	0.19121	0
5	0.01	0.19121	0.088633
10	0.01	0.19121	0.27334
15	0.01	0.19121	0.4909
20	0.01	0.19121	0.7172
25	0.01	0.19121	0.94321
30	0.01	0.19121	1.1656
35	0.01	0.19121	1.3833
40	0.01	0.19121	1.5959
45	0.01	0.19121	1.8033
50	0.01	0.19121	2.0057
55	0.01	0.19121	2.203
60	0.01	0.19121	2.3955
65	0.01	0.19121	2.5833
70	0.01	0.19121	2.7664
75	0.01	0.19121	2.945
80	0.01	0.19121	3.1192
85	0.01	0.19121	3.2891
90	0.01	0.19121	3.4548
95	0.01	0.19121	3.6164
100	0.01	0.19121	3.774
0	0.01	0.19515	0
5	0.01	0.19515	0.089949
10	0.01	0.19515	0.2763
15	0.01	0.19515	0.49484
20	0.01	0.19515	0.7216
25	0.01	0.19515	0.94777
30	0.01	0.19515	1.1702
35	0.01	0.19515	1.3878
40	0.01	0.19515	1.6003
45	0.01	0.19515	1.8076
50	0.01	0.19515	2.0099
55	0.01	0.19515	2.2072
60	0.01	0.19515	2.3996
65	0.01	0.19515	2.5872
70	0.01	0.19515	2.7702
75	0.01	0.19515	2.9487
80	0.01	0.19515	3.1228
85	0.01	0.19515	3.2926
90	0.01	0.19515	3.4582
95	0.01	0.19515	3.6197
100	0.01	0.19515	3.7773
0	0.01	0.19909	0
5	0.01	0.19909	0.09125
10	0.01	0.19909	0.27919
15	0.01	0.19909	0.49867
20	0.01	0.19909	0.72585
25	0.01	0.19909	0.95216
30	0.01	0.19909	1.1746
35	0.01	0.19909	1.3921
40	0.01	0.19909	1.6045
45	0.01	0.19909	1.8118
50	0.01	0.19909	2.0139
55	0.01	0.19909	2.2111
60	0.01	0.19909	2.4034
65	0.01	0.19909	2.591
70	0.01	0.19909	2.7739
75	0.01	0.19909	2.9523
80	0.01	0.19909	3.1263
85	0.01	0.19909	3.296
90	0.01	0.19909	3.4615
95	0.01	0.19909	3.623
100	0.01	0.19909	3.7804
0	0.01	0.20303	0
5	0.01	0.20303	0.092535
10	0.01	0.20303	0.28201
15	0.01	0.20303	0.50239
20	0.01	0.20303	0.72996
25	0.01	0.20303	0.95639
30	0.01	0.20303	1.1788
35	0.01	0.20303	1.3963
40	0.01	0.20303	1.6086
45	0.01	0.20303	1.8158
50	0.01	0.20303	2.0178
55	0.01	0.20303	2.2149
60	0.01	0.20303	2.4071
65	0.01	0.20303	2.5946
70	0.01	0.20303	2.7774
75	0.01	0.20303	2.9557
80	0.01	0.20303	3.1297
85	0.01	0.20303	3.2993
90	0.01	0.20303	3.4647
95	0.01	0.20303	3.6261
100	0.01	0.20303	3.7835
0	0.01	0.20697	0
5	0.01	0.20697	0.093805
10	0.01	0.20697	0.28478
15	0.01	0.20697	0.506
20	0.01	0.20697	0.73394
25	0.01	0.20697	0.96048
30	0.01	0.20697	1.1829
35	0.01	0.20697	1.4003
40	0.01	0.20697	1.6125
45	0.01	0.20697	1.8196
50	0.01	0.20697	2.0216
55	0.01	0.20697	2.2185
60	0.01	0.20697	2.4107
65	0.01	0.20697	2.598
70	0.01	0.20697	2.7808
75	0.01	0.20697	2.959
80	0.01	0.20697	3.1329
85	0.01	0.20697	3.3024
90	0.01	0.20697	3.4678
95	0.01	0.20697	3.6291
100	0.01	0.20697	3.7864
0	0.01	0.21091	0
5	0.01	0.21091	0.095059
10	0.01	0.21091	0.28749
15	0.01	0.21091	0.50951
20	0.01	0.21091	0.73779
25	0.01	0.21091	0.96442
30	0.01	0.21091	1.1868
35	0.01	0.21091	1.4042
40	0.01	0.21091	1.6163
45	0.01	0.21091	1.8233
50	0.01	0.21091	2.0252
55	0.01	0.21091	2.2221
60	0.01	0.21091	2.4141
65	0.01	0.21091	2.6014
70	0.01	0.21091	2.7841
75	0.01	0.21091	2.9622
80	0.01	0.21091	3.136
85	0.01	0.21091	3.3054
90	0.01	0.21091	3.4707
95	0.01	0.21091	3.6319
100	0.01	0.21091	3.7892
0	0.01	0.21485	0
5	0.01	0.21485	0.096299
10	0.01	0.21485	0.29014
15	0.01	0.21485	0.51293
20	0.01	0.21485	0.74151
25	0.01	0.21485	0.96822
30	0.01	0.21485	1.1906
35	0.01	0.21485	1.4079
40	0.01	0.21485	1.62
45	0.01	0.21485	1.8268
50	0.01	0.21485	2.0286
55	0.01	0.21485	2.2254
60	0.01	0.21485	2.4174
65	0.01	0.21485	2.6046
70	0.01	0.21485	2.7872
75	0.01	0.21485	2.9653
80	0.01	0.21485	3.139
85	0.01	0.21485	3.3084
90	0.01	0.21485	3.4736
95	0.01	0.21485	3.6347
100	0.01	0.21485	3.7919
0	0.01	0.21879	0
5	0.01	0.21879	0.097524
10	0.01	0.21879	0.29273
15	0.01	0.21879	0.51625
20	0.01	0.21879	0.74512
25	0.01	0.21879	0.9719
30	0.01	0.21879	1.1942
35	0.01	0.21879	1.4115
40	0.01	0.21879	1.6235
45	0.01	0.21879	1.8303
50	0.01	0.21879	2.032
55	0.01	0.21879	2.2287
60	0.01	0.21879	2.4206
65	0.01	0.21879	2.6077
70	0.01	0.21879	2.7902
75	0.01	0.21879	2.9682
80	0.01	0.21879	3.1418
85	0.01	0.21879	3.3112
90	0.01	0.21879	3.4763
95	0.01	0.21879	3.6374
100	0.01	0.21879	3.7945
0	0.01	0.22273	0
5	0.01	0.22273	0.098734
10	0.01	0.22273	0.29527
15	0.01	0.22273	0.51948
20	0.01	0.22273	0.74862
25	0.01	0.22273	0.97545
30	0.01	0.22273	1.1978
35	0.01	0.22273	1.4149
40	0.01	0.22273	1.6268
45	0.01	0.22273	1.8336
50	0.01	0.22273	2.0352
55	0.01	0.22273	2.2318
60	0.01	0.22273	2.4236
65	0.01	0.22273	2.6107
70	0.01	0.22273	2.7931
75	0.01	0.22273	2.9711
80	0.01	0.22273	3.1446
85	0.01	0.22273	3.3139
90	0.01	0.22273	3.4789
95	0.01	0.22273	3.6399
100	0.01	0.22273	3.797
0	0.01	0.22667	0
5	0.01	0.22667	0.099929
10	0.01	0.22667	0.29775
15	0.01	0.22667	0.52262
20	0.01	0.22667	0.752
25	0.01	0.22667	0.97889
30	0.01	0.22667	1.2012
35	0.01	0.22667	1.4183
40	0.01	0.22667	1.6301
45	0.01	0.22667	1.8367
50	0.01	0.22667	2.0383
55	0.01	0.22667	2.2349
60	0.01	0.22667	2.4266
65	0.01	0.22667	2.6136
70	0.01	0.22667	2.7959
75	0.01	0.22667	2.9738
80	0.01	0.22667	3.1473
85	0.01	0.22667	3.3165
90	0.01	0.22667	3.4815
95	0.01	0.22667	3.6424
100	0.01	0.22667	3.7994
0	0.01	0.23061	0
5	0.01	0.23061	0.10111
10	0.01	0.23061	0.30019
15	0.01	0.23061	0.52568
20	0.01	0.23061	0.75529
25	0.01	0.23061	0.98221
30	0.01	0.23061	1.2045
35	0.01	0.23061	1.4215
40	0.01	0.23061	1.6333
45	0.01	0.23061	1.8398
50	0.01	0.23061	2.0413
55	0.01	0.23061	2.2378
60	0.01	0.23061	2.4294
65	0.01	0.23061	2.6163
70	0.01	0.23061	2.7987
75	0.01	0.23061	2.9765
80	0.01	0.23061	3.1499
85	0.01	0.23061	3.319
90	0.01	0.23061	3.4839
95	0.01	0.23061	3.6448
100	0.01	0.23061	3.8017
0	0.01	0.23455	0
5	0.01	0.23455	0.10228
10	0.01	0.23455	0.30257
15	0.01	0.23455	0.52866
20	0.01	0.23455	0.75847
25	0.01	0.23455	0.98543
30	0.01	0.23455	1.2076
35	0.01	0.23455	1.4246
40	0.01	0.23455	1.6363
45	0.01	0.23455	1.8428
50	0.01	0.23455	2.0442
55	0.01	0.23455	2.2406
60	0.01	0.23455	2.4322
65	0.01	0.23455	2.619
70	0.01	0.23455	2.8013
75	0.01	0.23455	2.979
80	0.01	0.23455	3.1524
85	0.01	0.23455	3.3214
90	0.01	0.23455	3.4863
95	0.01	0.23455	3.6471
100	0.01	0.23455	3.804
0	0.01	0.23848	0
5	0.01	0.23848	0.10343
10	0.01	0.23848	0.30491
15	0.01	0.23848	0.53155
20	0.01	0.23848	0.76156
25	0.01	0.23848	0.98854
30	0.01	0.23848	1.2107
35	0.01	0.23848	1.4276
40	0.01	0.23848	1.6392
45	0.01	0.23848	1.8457
50	0.01	0.23848	2.047
55	0.01	0.23848	2.2433
60	0.01	0.23848	2.4349
65	0.01	0.23848	2.6216
70	0.01	0.23848	2.8038
75	0.01	0.23848	2.9815
80	0.01	0.23848	3.1548
85	0.01	0.23848	3.3238
90	0.01	0.23848	3.4886
95	0.01	0.23848	3.6494
100	0.01	0.23848	3.8062
0	0.01	0.24242	0
5	0.01	0.24242	0.10457
10	0.01	0.24242	0.3072
15	0.01	0.24242	0.53438
20	0.01	0.24242	0.76456
25	0.01	0.24242	0.99156
30	0.01	0.24242	1.2137
35	0.01	0.24242	1.4305
40	0.01	0.24242	1.6421
45	0.01	0.24242	1.8484
50	0.01	0.24242	2.0497
55	0.01	0.24242	2.246
60	0.01	0.24242	2.4374
65	0.01	0.24242	2.6242
70	0.01	0.24242	2.8063
75	0.01	0.24242	2.9839
80	0.01	0.24242	3.1571
85	0.01	0.24242	3.326
90	0.01	0.24242	3.4908
95	0.01	0.24242	3.6515
100	0.01	0.24242	3.8083
0	0.01	0.24636	0
5	0.01	0.24636	0.1057
10	0.01	0.24636	0.30944
15	0.01	0.24636	0.53712
20	0.01	0.24636	0.76747
25	0.01	0.24636	0.99448
30	0.01	0.24636	1.2166
35	0.01	0.24636	1.4333
40	0.01	0.24636	1.6448
45	0.01	0.24636	1.8511
50	0.01	0.24636	2.0523
55	0.01	0.24636	2.2485
60	0.01	0.24636	2.4399
65	0.01	0.24636	2.6266
70	0.01	0.24636	2.8086
75	0.01	0.24636	2.9862
80	0.01	0.24636	3.1594
85	0.01	0.24636	3.3283
90	0.01	0.24636	3.493
95	0.01	0.24636	3.6536
100	0.01	0.24636	3.8103
0	0.01	0.2503	0
5	0.01	0.2503	0.10681
10	0.01	0.2503	0.31163
15	0.01	0.2503	0.5398
20	0.01	0.2503	0.77029
25	0.01	0.2503	0.99732
30	0.01	0.2503	1.2194
35	0.01	0.2503	1.4361
40	0.01	0.2503	1.6475
45	0.01	0.2503	1.8537
50	0.01	0.2503	2.0549
55	0.01	0.2503	2.251
60	0.01	0.2503	2.4423
65	0.01	0.2503	2.6289
70	0.01	0.2503	2.8109
75	0.01	0.2503	2.9884
80	0.01	0.2503	3.1615
85	0.01	0.2503	3.3304
90	0.01	0.2503	3.4951
95	0.01	0.2503	3.6557
100	0.01	0.2503	3.8123
0	0.01	0.25424	0
5	0.01	0.25424	0.10791
10	0.01	0.25424	0.31378
15	0.01	0.25424	0.54241
20	0.01	0.25424	0.77304
25	0.01	0.25424	1.0001
30	0.01	0.25424	1.2221
35	0.01	0.25424	1.4387
40	0.01	0.25424	1.6501
45	0.01	0.25424	1.8562
50	0.01	0.25424	2.0573
55	0.01	0.25424	2.2534
60	0.01	0.25424	2.4447
65	0.01	0.25424	2.6312
70	0.01	0.25424	2.8132
75	0.01	0.25424	2.9906
80	0.01	0.25424	3.1637
85	0.01	0.25424	3.3324
90	0.01	0.25424	3.4971
95	0.01	0.25424	3.6576
100	0.01	0.25424	3.8142
0	0.01	0.25818	0
5	0.01	0.25818	0.109
10	0.01	0.25818	0.31589
15	0.01	0.25818	0.54495
20	0.01	0.25818	0.77571
25	0.01	0.25818	1.0027
30	0.01	0.25818	1.2247
35	0.01	0.25818	1.4413
40	0.01	0.25818	1.6526
45	0.01	0.25818	1.8587
50	0.01	0.25818	2.0597
55	0.01	0.25818	2.2557
60	0.01	0.25818	2.4469
65	0.01	0.25818	2.6334
70	0.01	0.25818	2.8153
75	0.01	0.25818	2.9927
80	0.01	0.25818	3.1657
85	0.01	0.25818	3.3344
90	0.01	0.25818	3.499
95	0.01	0.25818	3.6595
100	0.01	0.25818	3.8161
0	0.01	0.26212	0
5	0.01	0.26212	0.11008
10	0.01	0.26212	0.31795
15	0.01	0.26212	0.54743
20	0.01	0.26212	0.7783
25	0.01	0.26212	1.0053
30	0.01	0.26212	1.2272
35	0.01	0.26212	1.4438
40	0.01	0.26212	1.655
45	0.01	0.26212	1.8611
50	0.01	0.26212	2.062
55	0.01	0.26212	2.258
60	0.01	0.26212	2.4491
65	0.01	0.26212	2.6356
70	0.01	0.26212	2.8174
75	0.01	0.26212	2.9947
80	0.01	0.26212	3.1677
85	0.01	0.26212	3.3364
90	0.01	0.26212	3.5009
95	0.01	0.26212	3.6614
100	0.01	0.26212	3.8179
0	0.01	0.26606	0
5	0.01	0.26606	0.11114
10	0.01	0.26606	0.31998
15	0.01	0.26606	0.54985
20	0.01	0.26606	0.78082
25	0.01	0.26606	1.0078
30	0.01	0.26606	1.2297
35	0.01	0.26606	1.4462
40	0.01	0.26606	1.6574
45	0.01	0.26606	1.8634
50	0.01	0.26606	2.0642
55	0.01	0.26606	2.2602
60	0.01	0.26606	2.4513
65	0.01	0.26606	2.6377
70	0.01	0.26606	2.8194
75	0.01	0.26606	2.9967
80	0.01	0.26606	3.1696
85	0.01	0.26606	3.3383
90	0.01	0.26606	3.5027
95	0.01	0.26606	3.6632
100	0.01	0.26606	3.8196
0	0.01	0.27	0
5	0.01	0.27	0.11219
10	0.01	0.27	0.32196
15	0.01	0.27	0.55221
20	0.01	0.27	0.78327
25	0.01	0.27	1.0103
30	0.01	0.27	1.2321
35	0.01	0.27	1.4485
40	0.01	0.27	1.6597
45	0.01	0.27	1.8656
50	0.01	0.27	2.0664
55	0.01	0.27	2.2623
60	0.01	0.27	2.4533
65	0.01	0.27	2.6397
70	0.01	0.27	2.8214
75	0.01	0.27	2.9986
80	0.01	0.27	3.1715
85	0.01	0.27	3.3401
90	0.01	0.27	3.5045
95	0.01	0.27	3.6649
100	0.01	0.27	3.8213
0	0.01	0.27394	0
5	0.01	0.27394	0.11323
10	0.01	0.27394	0.32391
15	0.01	0.27394	0.55451
20	0.01	0.27394	0.78566
25	0.01	0.27394	1.0126
30	0.01	0.27394	1.2344
35	0.01	0.27394	1.4508
40	0.01	0.27394	1.6619
45	0.01	0.27394	1.8677
50	0.01	0.27394	2.0685
55	0.01	0.27394	2.2644
60	0.01	0.27394	2.4554
65	0.01	0.27394	2.6416
70	0.01	0.27394	2.8233
75	0.01	0.27394	3.0005
80	0.01	0.27394	3.1733
85	0.01	0.27394	3.3419
90	0.01	0.27394	3.5063
95	0.01	0.27394	3.6666
100	0.01	0.27394	3.823
0	0.01	0.27788	0
5	0.01	0.27788	0.11425
10	0.01	0.27788	0.32582
15	0.01	0.27788	0.55675
20	0.01	0.27788	0.78798
25	0.01	0.27788	1.015
30	0.01	0.27788	1.2367
35	0.01	0.27788	1.453
40	0.01	0.27788	1.664
45	0.01	0.27788	1.8699
50	0.01	0.27788	2.0706
55	0.01	0.27788	2.2664
60	0.01	0.27788	2.4573
65	0.01	0.27788	2.6435
70	0.01	0.27788	2.8252
75	0.01	0.27788	3.0023
80	0.01	0.27788	3.1751
85	0.01	0.27788	3.3436
90	0.01	0.27788	3.5079
95	0.01	0.27788	3.6682
100	0.01	0.27788	3.8246
0	0.01	0.28182	0
5	0.01	0.28182	0.11527
10	0.01	0.28182	0.32769
15	0.01	0.28182	0.55894
20	0.01	0.28182	0.79024
25	0.01	0.28182	1.0172
30	0.01	0.28182	1.2389
35	0.01	0.28182	1.4552
40	0.01	0.28182	1.6661
45	0.01	0.28182	1.8719
50	0.01	0.28182	2.0726
55	0.01	0.28182	2.2683
60	0.01	0.28182	2.4592
65	0.01	0.28182	2.6454
70	0.01	0.28182	2.827
75	0.01	0.28182	3.0041
80	0.01	0.28182	3.1768
85	0.01	0.28182	3.3453
90	0.01	0.28182	3.5096
95	0.01	0.28182	3.6698
100	0.01	0.28182	3.8261
0	0.01	0.28576	0
5	0.01	0.28576	0.11627
10	0.01	0.28576	0.32952
15	0.01	0.28576	0.56108
20	0.01	0.28576	0.79244
25	0.01	0.28576	1.0194
30	0.01	0.28576	1.241
35	0.01	0.28576	1.4573
40	0.01	0.28576	1.6682
45	0.01	0.28576	1.8739
50	0.01	0.28576	2.0745
55	0.01	0.28576	2.2702
60	0.01	0.28576	2.461
65	0.01	0.28576	2.6472
70	0.01	0.28576	2.8287
75	0.01	0.28576	3.0058
80	0.01	0.28576	3.1785
85	0.01	0.28576	3.3469
90	0.01	0.28576	3.5112
95	0.01	0.28576	3.6714
100	0.01	0.28576	3.8276
0	0.01	0.2897	0
5	0.01	0.2897	0.11726
10	0.01	0.2897	0.33132
15	0.01	0.2897	0.56316
20	0.01	0.2897	0.79458
25	0.01	0.2897	1.0215
30	0.01	0.2897	1.2431
35	0.01	0.2897	1.4593
40	0.01	0.2897	1.6702
45	0.01	0.2897	1.8758
50	0.01	0.2897	2.0764
55	0.01	0.2897	2.272
60	0.01	0.2897	2.4628
65	0.01	0.2897	2.6489
70	0.01	0.2897	2.8304
75	0.01	0.2897	3.0074
80	0.01	0.2897	3.1801
85	0.01	0.2897	3.3485
90	0.01	0.2897	3.5127
95	0.01	0.2897	3.6729
100	0.01	0.2897	3.8291
0	0.01	0.29364	0
5	0.01	0.29364	0.11824
10	0.01	0.29364	0.33308
15	0.01	0.29364	0.5652
20	0.01	0.29364	0.79667
25	0.01	0.29364	1.0236
30	0.01	0.29364	1.2451
35	0.01	0.29364	1.4613
40	0.01	0.29364	1.6721
45	0.01	0.29364	1.8777
50	0.01	0.29364	2.0782
55	0.01	0.29364	2.2738
60	0.01	0.29364	2.4646
65	0.01	0.29364	2.6506
70	0.01	0.29364	2.8321
75	0.01	0.29364	3.0091
80	0.01	0.29364	3.1817
85	0.01	0.29364	3.35
90	0.01	0.29364	3.5142
95	0.01	0.29364	3.6743
100	0.01	0.29364	3.8305
0	0.01	0.29758	0
5	0.01	0.29758	0.11921
10	0.01	0.29758	0.33481
15	0.01	0.29758	0.56719
20	0.01	0.29758	0.79871
25	0.01	0.29758	1.0256
30	0.01	0.29758	1.2471
35	0.01	0.29758	1.4632
40	0.01	0.29758	1.674
45	0.01	0.29758	1.8795
50	0.01	0.29758	2.08
55	0.01	0.29758	2.2756
60	0.01	0.29758	2.4663
65	0.01	0.29758	2.6523
70	0.01	0.29758	2.8337
75	0.01	0.29758	3.0106
80	0.01	0.29758	3.1832
85	0.01	0.29758	3.3515
90	0.01	0.29758	3.5157
95	0.01	0.29758	3.6758
100	0.01	0.29758	3.8319
0	0.01	0.30152	0
5	0.01	0.30152	0.12017
10	0.01	0.30152	0.33651
15	0.01	0.30152	0.56913
20	0.01	0.30152	0.80069
25	0.01	0.30152	1.0275
30	0.01	0.30152	1.249
35	0.01	0.30152	1.4651
40	0.01	0.30152	1.6758
45	0.01	0.30152	1.8813
50	0.01	0.30152	2.0818
55	0.01	0.30152	2.2773
60	0.01	0.30152	2.4679
65	0.01	0.30152	2.6539
70	0.01	0.30152	2.8353
75	0.01	0.30152	3.0122
80	0.01	0.30152	3.1847
85	0.01	0.30152	3.353
90	0.01	0.30152	3.5171
95	0.01	0.30152	3.6771
100	0.01	0.30152	3.8333
0	0.01	0.30545	0
5	0.01	0.30545	0.12111
10	0.01	0.30545	0.33818
15	0.01	0.30545	0.57103
20	0.01	0.30545	0.80263
25	0.01	0.30545	1.0295
30	0.01	0.30545	1.2509
35	0.01	0.30545	1.4669
40	0.01	0.30545	1.6776
45	0.01	0.30545	1.883
50	0.01	0.30545	2.0835
55	0.01	0.30545	2.2789
60	0.01	0.30545	2.4695
65	0.01	0.30545	2.6555
70	0.01	0.30545	2.8368
75	0.01	0.30545	3.0137
80	0.01	0.30545	3.1862
85	0.01	0.30545	3.3544
90	0.01	0.30545	3.5185
95	0.01	0.30545	3.6785
100	0.01	0.30545	3.8346
0	0.01	0.30939	0
5	0.01	0.30939	0.12205
10	0.01	0.30939	0.33981
15	0.01	0.30939	0.57289
20	0.01	0.30939	0.80452
25	0.01	0.30939	1.0313
30	0.01	0.30939	1.2527
35	0.01	0.30939	1.4687
40	0.01	0.30939	1.6793
45	0.01	0.30939	1.8847
50	0.01	0.30939	2.0851
55	0.01	0.30939	2.2805
60	0.01	0.30939	2.4711
65	0.01	0.30939	2.657
70	0.01	0.30939	2.8383
75	0.01	0.30939	3.0151
80	0.01	0.30939	3.1876
85	0.01	0.30939	3.3558
90	0.01	0.30939	3.5198
95	0.01	0.30939	3.6798
100	0.01	0.30939	3.8359
0	0.01	0.31333	0
5	0.01	0.31333	0.12297
10	0.01	0.31333	0.34141
15	0.01	0.31333	0.5747
20	0.01	0.31333	0.80636
25	0.01	0.31333	1.0331
30	0.01	0.31333	1.2545
35	0.01	0.31333	1.4704
40	0.01	0.31333	1.681
45	0.01	0.31333	1.8864
50	0.01	0.31333	2.0867
55	0.01	0.31333	2.2821
60	0.01	0.31333	2.4726
65	0.01	0.31333	2.6585
70	0.01	0.31333	2.8398
75	0.01	0.31333	3.0165
80	0.01	0.31333	3.189
85	0.01	0.31333	3.3571
90	0.01	0.31333	3.5211
95	0.01	0.31333	3.6811
100	0.01	0.31333	3.8371
0	0.01	0.31727	0
5	0.01	0.31727	0.12389
10	0.01	0.31727	0.34299
15	0.01	0.31727	0.57647
20	0.01	0.31727	0.80815
25	0.01	0.31727	1.0349
30	0.01	0.31727	1.2562
35	0.01	0.31727	1.4721
40	0.01	0.31727	1.6826
45	0.01	0.31727	1.888
50	0.01	0.31727	2.0883
55	0.01	0.31727	2.2836
60	0.01	0.31727	2.4741
65	0.01	0.31727	2.66
70	0.01	0.31727	2.8412
75	0.01	0.31727	3.0179
80	0.01	0.31727	3.1903
85	0.01	0.31727	3.3584
90	0.01	0.31727	3.5224
95	0.01	0.31727	3.6824
100	0.01	0.31727	3.8383
0	0.01	0.32121	0
5	0.01	0.32121	0.12479
10	0.01	0.32121	0.34453
15	0.01	0.32121	0.57821
20	0.01	0.32121	0.80991
25	0.01	0.32121	1.0366
30	0.01	0.32121	1.2579
35	0.01	0.32121	1.4737
40	0.01	0.32121	1.6842
45	0.01	0.32121	1.8896
50	0.01	0.32121	2.0898
55	0.01	0.32121	2.2851
60	0.01	0.32121	2.4756
65	0.01	0.32121	2.6614
70	0.01	0.32121	2.8426
75	0.01	0.32121	3.0193
80	0.01	0.32121	3.1916
85	0.01	0.32121	3.3597
90	0.01	0.32121	3.5237
95	0.01	0.32121	3.6836
100	0.01	0.32121	3.8395
0	0.01	0.32515	0
5	0.01	0.32515	0.12569
10	0.01	0.32515	0.34605
15	0.01	0.32515	0.5799
20	0.01	0.32515	0.81162
25	0.01	0.32515	1.0383
30	0.01	0.32515	1.2595
35	0.01	0.32515	1.4753
40	0.01	0.32515	1.6858
45	0.01	0.32515	1.8911
50	0.01	0.32515	2.0913
55	0.01	0.32515	2.2866
60	0.01	0.32515	2.477
65	0.01	0.32515	2.6628
70	0.01	0.32515	2.8439
75	0.01	0.32515	3.0206
80	0.01	0.32515	3.1929
85	0.01	0.32515	3.361
90	0.01	0.32515	3.5249
95	0.01	0.32515	3.6848
100	0.01	0.32515	3.8407
0	0.01	0.32909	0
5	0.01	0.32909	0.12657
10	0.01	0.32909	0.34754
15	0.01	0.32909	0.58156
20	0.01	0.32909	0.81329
25	0.01	0.32909	1.04
30	0.01	0.32909	1.2612
35	0.01	0.32909	1.4769
40	0.01	0.32909	1.6873
45	0.01	0.32909	1.8926
50	0.01	0.32909	2.0928
55	0.01	0.32909	2.288
60	0.01	0.32909	2.4784
65	0.01	0.32909	2.6641
70	0.01	0.32909	2.8452
75	0.01	0.32909	3.0219
80	0.01	0.32909	3.1942
85	0.01	0.32909	3.3622
90	0.01	0.32909	3.5261
95	0.01	0.32909	3.6859
100	0.01	0.32909	3.8418
0	0.01	0.33303	0
5	0.01	0.33303	0.12744
10	0.01	0.33303	0.349
15	0.01	0.33303	0.58318
20	0.01	0.33303	0.81493
25	0.01	0.33303	1.0416
30	0.01	0.33303	1.2627
35	0.01	0.33303	1.4784
40	0.01	0.33303	1.6888
45	0.01	0.33303	1.894
50	0.01	0.33303	2.0942
55	0.01	0.33303	2.2894
60	0.01	0.33303	2.4797
65	0.01	0.33303	2.6654
70	0.01	0.33303	2.8465
75	0.01	0.33303	3.0231
80	0.01	0.33303	3.1954
85	0.01	0.33303	3.3634
90	0.01	0.33303	3.5273
95	0.01	0.33303	3.6871
100	0.01	0.33303	3.8429
0	0.01	0.33697	0
5	0.01	0.33697	0.12831
10	0.01	0.33697	0.35044
15	0.01	0.33697	0.58477
20	0.01	0.33697	0.81652
25	0.01	0.33697	1.0431
30	0.01	0.33697	1.2643
35	0.01	0.33697	1.4799
40	0.01	0.33697	1.6903
45	0.01	0.33697	1.8955
50	0.01	0.33697	2.0956
55	0.01	0.33697	2.2907
60	0.01	0.33697	2.4811
65	0.01	0.33697	2.6667
70	0.01	0.33697	2.8478
75	0.01	0.33697	3.0244
80	0.01	0.33697	3.1966
85	0.01	0.33697	3.3646
90	0.01	0.33697	3.5284
95	0.01	0.33697	3.6882
100	0.01	0.33697	3.844
0	0.01	0.34091	0
5	0.01	0.34091	0.12916
10	0.01	0.34091	0.35184
15	0.01	0.34091	0.58632
20	0.01	0.34091	0.81808
25	0.01	0.34091	1.0447
30	0.01	0.34091	1.2658
35	0.01	0.34091	1.4814
40	0.01	0.34091	1.6917
45	0.01	0.34091	1.8969
50	0.01	0.34091	2.0969
55	0.01	0.34091	2.292
60	0.01	0.34091	2.4824
65	0.01	0.34091	2.668
70	0.01	0.34091	2.849
75	0.01	0.34091	3.0256
80	0.01	0.34091	3.1978
85	0.01	0.34091	3.3657
90	0.01	0.34091	3.5295
95	0.01	0.34091	3.6893
100	0.01	0.34091	3.8451
0	0.01	0.34485	0
5	0.01	0.34485	0.13001
10	0.01	0.34485	0.35323
15	0.01	0.34485	0.58784
20	0.01	0.34485	0.81961
25	0.01	0.34485	1.0462
30	0.01	0.34485	1.2672
35	0.01	0.34485	1.4828
40	0.01	0.34485	1.6931
45	0.01	0.34485	1.8982
50	0.01	0.34485	2.0982
55	0.01	0.34485	2.2933
60	0.01	0.34485	2.4836
65	0.01	0.34485	2.6692
70	0.01	0.34485	2.8502
75	0.01	0.34485	3.0267
80	0.01	0.34485	3.1989
85	0.01	0.34485	3.3668
90	0.01	0.34485	3.5306
95	0.01	0.34485	3.6903
100	0.01	0.34485	3.8461
0	0.01	0.34879	0
5	0.01	0.34879	0.13085
10	0.01	0.34879	0.35459
15	0.01	0.34879	0.58933
20	0.01	0.34879	0.8211
25	0.01	0.34879	1.0476
30	0.01	0.34879	1.2686
35	0.01	0.34879	1.4842
40	0.01	0.34879	1.6945
45	0.01	0.34879	1.8995
50	0.01	0.34879	2.0995
55	0.01	0.34879	2.2946
60	0.01	0.34879	2.4848
65	0.01	0.34879	2.6704
70	0.01	0.34879	2.8514
75	0.01	0.34879	3.0279
80	0.01	0.34879	3.2
85	0.01	0.34879	3.3679
90	0.01	0.34879	3.5316
95	0.01	0.34879	3.6913
100	0.01	0.34879	3.8471
0	0.01	0.35273	0
5	0.01	0.35273	0.13167
10	0.01	0.35273	0.35592
15	0.01	0.35273	0.59079
20	0.01	0.35273	0.82256
25	0.01	0.35273	1.0491
30	0.01	0.35273	1.27
35	0.01	0.35273	1.4856
40	0.01	0.35273	1.6958
45	0.01	0.35273	1.9008
50	0.01	0.35273	2.1008
55	0.01	0.35273	2.2958
60	0.01	0.35273	2.4861
65	0.01	0.35273	2.6716
70	0.01	0.35273	2.8525
75	0.01	0.35273	3.029
80	0.01	0.35273	3.2011
85	0.01	0.35273	3.369
90	0.01	0.35273	3.5327
95	0.01	0.35273	3.6924
100	0.01	0.35273	3.8481
0	0.01	0.35667	0
5	0.01	0.35667	0.13249
10	0.01	0.35667	0.35724
15	0.01	0.35667	0.59222
20	0.01	0.35667	0.82399
25	0.01	0.35667	1.0505
30	0.01	0.35667	1.2714
35	0.01	0.35667	1.4869
40	0.01	0.35667	1.6971
45	0.01	0.35667	1.9021
50	0.01	0.35667	2.102
55	0.01	0.35667	2.297
60	0.01	0.35667	2.4872
65	0.01	0.35667	2.6727
70	0.01	0.35667	2.8536
75	0.01	0.35667	3.0301
80	0.01	0.35667	3.2022
85	0.01	0.35667	3.37
90	0.01	0.35667	3.5337
95	0.01	0.35667	3.6933
100	0.01	0.35667	3.849
0	0.01	0.36061	0
5	0.01	0.36061	0.1333
10	0.01	0.36061	0.35853
15	0.01	0.36061	0.59362
20	0.01	0.36061	0.82538
25	0.01	0.36061	1.0518
30	0.01	0.36061	1.2727
35	0.01	0.36061	1.4882
40	0.01	0.36061	1.6984
45	0.01	0.36061	1.9033
50	0.01	0.36061	2.1033
55	0.01	0.36061	2.2982
60	0.01	0.36061	2.4884
65	0.01	0.36061	2.6738
70	0.01	0.36061	2.8547
75	0.01	0.36061	3.0311
80	0.01	0.36061	3.2032
85	0.01	0.36061	3.371
90	0.01	0.36061	3.5347
95	0.01	0.36061	3.6943
100	0.01	0.36061	3.85
0	0.01	0.36455	0
5	0.01	0.36455	0.1341
10	0.01	0.36455	0.35979
15	0.01	0.36455	0.59499
20	0.01	0.36455	0.82675
25	0.01	0.36455	1.0532
30	0.01	0.36455	1.2741
35	0.01	0.36455	1.4895
40	0.01	0.36455	1.6996
45	0.01	0.36455	1.9046
50	0.01	0.36455	2.1044
55	0.01	0.36455	2.2994
60	0.01	0.36455	2.4895
65	0.01	0.36455	2.6749
70	0.01	0.36455	2.8558
75	0.01	0.36455	3.0322
80	0.01	0.36455	3.2042
85	0.01	0.36455	3.372
90	0.01	0.36455	3.5356
95	0.01	0.36455	3.6952
100	0.01	0.36455	3.8509
0	0.01	0.36848	0
5	0.01	0.36848	0.13489
10	0.01	0.36848	0.36104
15	0.01	0.36848	0.59633
20	0.01	0.36848	0.82809
25	0.01	0.36848	1.0545
30	0.01	0.36848	1.2753
35	0.01	0.36848	1.4907
40	0.01	0.36848	1.7008
45	0.01	0.36848	1.9057
50	0.01	0.36848	2.1056
55	0.01	0.36848	2.3005
60	0.01	0.36848	2.4906
65	0.01	0.36848	2.676
70	0.01	0.36848	2.8568
75	0.01	0.36848	3.0332
80	0.01	0.36848	3.2052
85	0.01	0.36848	3.373
90	0.01	0.36848	3.5366
95	0.01	0.36848	3.6962
100	0.01	0.36848	3.8518
0	0.01	0.37242	0
5	0.01	0.37242	0.13567
10	0.01	0.37242	0.36226
15	0.01	0.37242	0.59764
20	0.01	0.37242	0.8294
25	0.01	0.37242	1.0558
30	0.01	0.37242	1.2766
35	0.01	0.37242	1.492
40	0.01	0.37242	1.702
45	0.01	0.37242	1.9069
50	0.01	0.37242	2.1067
55	0.01	0.37242	2.3016
60	0.01	0.37242	2.4917
65	0.01	0.37242	2.6771
70	0.01	0.37242	2.8579
75	0.01	0.37242	3.0342
80	0.01	0.37242	3.2062
85	0.01	0.37242	3.3739
90	0.01	0.37242	3.5375
95	0.01	0.37242	3.6971
100	0.01	0.37242	3.8527
0	0.01	0.37636	0
5	0.01	0.37636	0.13645
10	0.01	0.37636	0.36346
15	0.01	0.37636	0.59893
20	0.01	0.37636	0.83068
25	0.01	0.37636	1.057
30	0.01	0.37636	1.2778
35	0.01	0.37636	1.4932
40	0.01	0.37636	1.7032
45	0.01	0.37636	1.908
50	0.01	0.37636	2.1078
55	0.01	0.37636	2.3027
60	0.01	0.37636	2.4927
65	0.01	0.37636	2.6781
70	0.01	0.37636	2.8589
75	0.01	0.37636	3.0352
80	0.01	0.37636	3.2071
85	0.01	0.37636	3.3749
90	0.01	0.37636	3.5384
95	0.01	0.37636	3.698
100	0.01	0.37636	3.8536
0	0.01	0.3803	0
5	0.01	0.3803	0.13721
10	0.01	0.3803	0.36464
15	0.01	0.3803	0.6002
20	0.01	0.3803	0.83194
25	0.01	0.3803	1.0582
30	0.01	0.3803	1.279
35	0.01	0.3803	1.4943
40	0.01	0.3803	1.7043
45	0.01	0.3803	1.9092
50	0.01	0.3803	2.1089
55	0.01	0.3803	2.3037
60	0.01	0.3803	2.4938
65	0.01	0.3803	2.6791
70	0.01	0.3803	2.8599
75	0.01	0.3803	3.0361
80	0.01	0.3803	3.2081
85	0.01	0.3803	3.3758
90	0.01	0.3803	3.5393
95	0.01	0.3803	3.6988
100	0.01	0.3803	3.8544
0	0.01	0.38424	0
5	0.01	0.38424	0.13797
10	0.01	0.38424	0.36581
15	0.01	0.38424	0.60144
20	0.01	0.38424	0.83317
25	0.01	0.38424	1.0595
30	0.01	0.38424	1.2802
35	0.01	0.38424	1.4955
40	0.01	0.38424	1.7055
45	0.01	0.38424	1.9102
50	0.01	0.38424	2.11
55	0.01	0.38424	2.3048
60	0.01	0.38424	2.4948
65	0.01	0.38424	2.6801
70	0.01	0.38424	2.8608
75	0.01	0.38424	3.0371
80	0.01	0.38424	3.209
85	0.01	0.38424	3.3767
90	0.01	0.38424	3.5402
95	0.01	0.38424	3.6997
100	0.01	0.38424	3.8552
0	0.01	0.38818	0
5	0.01	0.38818	0.13872
10	0.01	0.38818	0.36695
15	0.01	0.38818	0.60265
20	0.01	0.38818	0.83437
25	0.01	0.38818	1.0606
30	0.01	0.38818	1.2813
35	0.01	0.38818	1.4966
40	0.01	0.38818	1.7066
45	0.01	0.38818	1.9113
50	0.01	0.38818	2.111
55	0.01	0.38818	2.3058
60	0.01	0.38818	2.4958
65	0.01	0.38818	2.6811
70	0.01	0.38818	2.8618
75	0.01	0.38818	3.038
80	0.01	0.38818	3.2099
85	0.01	0.38818	3.3775
90	0.01	0.38818	3.541
95	0.01	0.38818	3.7005
100	0.01	0.38818	3.856
0	0.01	0.39212	0
5	0.01	0.39212	0.13946
10	0.01	0.39212	0.36807
15	0.01	0.39212	0.60384
20	0.01	0.39212	0.83555
25	0.01	0.39212	1.0618
30	0.01	0.39212	1.2825
35	0.01	0.39212	1.4977
40	0.01	0.39212	1.7076
45	0.01	0.39212	1.9124
50	0.01	0.39212	2.112
55	0.01	0.39212	2.3068
60	0.01	0.39212	2.4967
65	0.01	0.39212	2.682
70	0.01	0.39212	2.8627
75	0.01	0.39212	3.0389
80	0.01	0.39212	3.2108
85	0.01	0.39212	3.3784
90	0.01	0.39212	3.5419
95	0.01	0.39212	3.7013
100	0.01	0.39212	3.8568
0	0.01	0.39606	0
5	0.01	0.39606	0.14019
10	0.01	0.39606	0.36917
15	0.01	0.39606	0.60501
20	0.01	0.39606	0.83671
25	0.01	0.39606	1.0629
30	0.01	0.39606	1.2836
35	0.01	0.39606	1.4988
40	0.01	0.39606	1.7087
45	0.01	0.39606	1.9134
50	0.01	0.39606	2.113
55	0.01	0.39606	2.3078
60	0.01	0.39606	2.4977
65	0.01	0.39606	2.6829
70	0.01	0.39606	2.8636
75	0.01	0.39606	3.0398
80	0.01	0.39606	3.2116
85	0.01	0.39606	3.3792
90	0.01	0.39606	3.5427
95	0.01	0.39606	3.7021
100	0.01	0.39606	3.8576
0	0.01	0.4	0
5	0.01	0.4	0.14091
10	0.01	0.4	0.37026
15	0.01	0.4	0.60616
20	0.01	0.4	0.83785
25	0.01	0.4	1.064
30	0.01	0.4	1.2847
35	0.01	0.4	1.4998
40	0.01	0.4	1.7097
45	0.01	0.4	1.9144
50	0.01	0.4	2.114
55	0.01	0.4	2.3087
60	0.01	0.4	2.4986
65	0.01	0.4	2.6838
70	0.01	0.4	2.8645
75	0.01	0.4	3.0406
80	0.01	0.4	3.2125
85	0.01	0.4	3.3801
90	0.01	0.4	3.5435
95	0.01	0.4	3.7029
100	0.01	0.4	3.8584
0	0.02	0.01	0
5	0.02	0.01	0.012287
10	0.02	0.01	0.048257
15	0.02	0.01	0.10651
20	0.02	0.01	0.18556
25	0.02	0.01	0.2839
30	0.02	0.01	0.39996
35	0.02	0.01	0.5322
40	0.02	0.01	0.67904
45	0.02	0.01	0.83898
50	0.02	0.01	1.0105
55	0.02	0.01	1.1922
60	0.02	0.01	1.3827
65	0.02	0.01	1.5806
70	0.02	0.01	1.7847
75	0.02	0.01	1.9938
80	0.02	0.01	2.2068
85	0.02	0.01	2.4226
90	0.02	0.01	2.6403
95	0.02	0.01	2.859
100	0.02	0.01	3.078
0	0.02	0.013939	0
5	0.02	0.013939	0.017012
10	0.02	0.013939	0.066347
15	0.02	0.013939	0.14537
[truncated: 207,875+ more rows]

## Sheet: combined_kinetics(with+without)
time	[Pd(II)]0	k1	[P]t
0	1	3	0
5	1	3	2.3274
10	1	3	3.5623
15	1	3	4.5984
20	1	3	5.4678
25	1	3	6.1972
30	1	3	6.8093
35	1	3	7.3228
40	1	3	7.7537
45	1	3	8.1152
50	1	3	8.4186
55	1	3	8.6731
60	1	3	8.8867
65	1	3	9.0658
70	1	3	9.2162
75	1	3	9.3423
80	1	3	9.4482
85	1	3	9.537
90	1	3	9.6115
95	1	3	9.674
100	1	3	9.7265
0	1	3.0707	0
5	1	3.0707	2.2978
10	1	3.0707	3.5051
15	1	3.0707	4.5231
20	1	3.0707	5.3815
25	1	3.0707	6.1054
30	1	3.0707	6.7158
35	1	3.0707	7.2306
40	1	3.0707	7.6647
45	1	3.0707	8.0307
50	1	3.0707	8.3394
55	1	3.0707	8.5997
60	1	3.0707	8.8191
65	1	3.0707	9.0042
70	1	3.0707	9.1603
75	1	3.0707	9.2919
80	1	3.0707	9.4029
85	1	3.0707	9.4965
90	1	3.0707	9.5754
95	1	3.0707	9.6419
100	1	3.0707	9.6981
0	1	3.1414	0
5	1	3.1414	2.2683
10	1	3.1414	3.4476
15	1	3.1414	4.447
20	1	3.1414	5.2939
25	1	3.1414	6.0117
30	1	3.1414	6.62
35	1	3.1414	7.1355
40	1	3.1414	7.5724
45	1	3.1414	7.9427
50	1	3.1414	8.2565
55	1	3.1414	8.5224
60	1	3.1414	8.7478
65	1	3.1414	8.9388
70	1	3.1414	9.1006
75	1	3.1414	9.2378
80	1	3.1414	9.354
85	1	3.1414	9.4526
90	1	3.1414	9.5361
95	1	3.1414	9.6068
100	1	3.1414	9.6668
0	1	3.2121	0
5	1	3.2121	2.2389
10	1	3.2121	3.3901
15	1	3.2121	4.3705
20	1	3.2121	5.2055
25	1	3.2121	5.9166
30	1	3.2121	6.5223
35	1	3.2121	7.0381
40	1	3.2121	7.4775
45	1	3.2121	7.8516
50	1	3.2121	8.1703
55	1	3.2121	8.4417
60	1	3.2121	8.6728
65	1	3.2121	8.8697
70	1	3.2121	9.0373
75	1	3.2121	9.1801
80	1	3.2121	9.3017
85	1	3.2121	9.4053
90	1	3.2121	9.4935
95	1	3.2121	9.5686
100	1	3.2121	9.6326
0	1	3.2828	0
5	1	3.2828	2.2097
10	1	3.2828	3.3329
15	1	3.2828	4.2941
20	1	3.2828	5.1167
25	1	3.2828	5.8207
30	1	3.2828	6.4233
35	1	3.2828	6.9389
40	1	3.2828	7.3803
45	1	3.2828	7.758
50	1	3.2828	8.0812
55	1	3.2828	8.3578
60	1	3.2828	8.5946
65	1	3.2828	8.7972
70	1	3.2828	8.9706
75	1	3.2828	9.119
80	1	3.2828	9.246
85	1	3.2828	9.3547
90	1	3.2828	9.4478
95	1	3.2828	9.5274
100	1	3.2828	9.5955
0	1	3.3535	0
5	1	3.3535	2.1809
10	1	3.3535	3.2762
15	1	3.3535	4.218
20	1	3.3535	5.0279
25	1	3.3535	5.7244
30	1	3.3535	6.3233
35	1	3.3535	6.8383
40	1	3.3535	7.2812
45	1	3.3535	7.662
50	1	3.3535	7.9895
55	1	3.3535	8.2711
60	1	3.3535	8.5133
65	1	3.3535	8.7215
70	1	3.3535	8.9006
75	1	3.3535	9.0546
80	1	3.3535	9.187
85	1	3.3535	9.3009
90	1	3.3535	9.3988
95	1	3.3535	9.483
100	1	3.3535	9.5554
0	1	3.4242	0
5	1	3.4242	2.1525
10	1	3.4242	3.2201
15	1	3.4242	4.1425
20	1	3.4242	4.9394
25	1	3.4242	5.6278
30	1	3.4242	6.2227
35	1	3.4242	6.7365
40	1	3.4242	7.1805
45	1	3.4242	7.5641
50	1	3.4242	7.8955
55	1	3.4242	8.1818
60	1	3.4242	8.4292
65	1	3.4242	8.6429
70	1	3.4242	8.8275
75	1	3.4242	8.987
80	1	3.4242	9.1248
85	1	3.4242	9.2439
90	1	3.4242	9.3467
95	1	3.4242	9.4356
100	1	3.4242	9.5124
0	1	3.4949	0
5	1	3.4949	2.1245
10	1	3.4949	3.1648
15	1	3.4949	4.0677
20	1	3.4949	4.8513
25	1	3.4949	5.5315
30	1	3.4949	6.1217
35	1	3.4949	6.634
40	1	3.4949	7.0786
45	1	3.4949	7.4645
50	1	3.4949	7.7995
55	1	3.4949	8.0901
60	1	3.4949	8.3424
65	1	3.4949	8.5614
70	1	3.4949	8.7514
75	1	3.4949	8.9163
80	1	3.4949	9.0595
85	1	3.4949	9.1837
90	1	3.4949	9.2915
95	1	3.4949	9.3851
100	1	3.4949	9.4663
0	1	3.5657	0
5	1	3.5657	2.0971
10	1	3.5657	3.1104
15	1	3.5657	3.9939
20	1	3.5657	4.764
25	1	3.5657	5.4354
30	1	3.5657	6.0207
35	1	3.5657	6.5309
40	1	3.5657	6.9758
45	1	3.5657	7.3635
50	1	3.5657	7.7016
55	1	3.5657	7.9963
60	1	3.5657	8.2532
65	1	3.5657	8.4772
70	1	3.5657	8.6725
75	1	3.5657	8.8427
80	1	3.5657	8.9911
85	1	3.5657	9.1205
90	1	3.5657	9.2332
95	1	3.5657	9.3315
100	1	3.5657	9.4173
0	1	3.6364	0
5	1	3.6364	2.0702
10	1	3.6364	3.057
15	1	3.6364	3.921
20	1	3.6364	4.6775
25	1	3.6364	5.3399
30	1	3.6364	5.9198
35	1	3.6364	6.4276
40	1	3.6364	6.8722
45	1	3.6364	7.2614
50	1	3.6364	7.6022
55	1	3.6364	7.9006
60	1	3.6364	8.1619
65	1	3.6364	8.3906
70	1	3.6364	8.5909
75	1	3.6364	8.7662
80	1	3.6364	8.9198
85	1	3.6364	9.0542
90	1	3.6364	9.1719
95	1	3.6364	9.2749
100	1	3.6364	9.3652
0	1	3.7071	0
5	1	3.7071	2.0438
10	1	3.7071	3.0046
15	1	3.7071	3.8493
20	1	3.7071	4.5921
25	1	3.7071	5.2451
30	1	3.7071	5.8193
35	1	3.7071	6.3241
40	1	3.7071	6.768
45	1	3.7071	7.1583
50	1	3.7071	7.5014
55	1	3.7071	7.8031
60	1	3.7071	8.0684
65	1	3.7071	8.3017
70	1	3.7071	8.5068
75	1	3.7071	8.6871
80	1	3.7071	8.8456
85	1	3.7071	8.985
90	1	3.7071	9.1076
95	1	3.7071	9.2153
100	1	3.7071	9.3101
0	1	3.7778	0
5	1	3.7778	2.0181
10	1	3.7778	2.9532
15	1	3.7778	3.7788
20	1	3.7778	4.5077
25	1	3.7778	5.1512
30	1	3.7778	5.7193
35	1	3.7778	6.2208
40	1	3.7778	6.6636
45	1	3.7778	7.0545
50	1	3.7778	7.3996
55	1	3.7778	7.7042
60	1	3.7778	7.9732
65	1	3.7778	8.2107
70	1	3.7778	8.4203
75	1	3.7778	8.6054
80	1	3.7778	8.7688
85	1	3.7778	8.913
90	1	3.7778	9.0404
95	1	3.7778	9.1528
100	1	3.7778	9.2521
0	1	3.8485	0
5	1	3.8485	1.9929
10	1	3.8485	2.9029
15	1	3.8485	3.7096
20	1	3.8485	4.4245
25	1	3.8485	5.0582
30	1	3.8485	5.6199
35	1	3.8485	6.1177
40	1	3.8485	6.5589
45	1	3.8485	6.95
50	1	3.8485	7.2967
55	1	3.8485	7.6039
60	1	3.8485	7.8763
65	1	3.8485	8.1176
70	1	3.8485	8.3316
75	1	3.8485	8.5212
80	1	3.8485	8.6893
85	1	3.8485	8.8382
90	1	3.8485	8.9703
95	1	3.8485	9.0873
100	1	3.8485	9.191
0	1	3.9192	0
5	1	3.9192	1.9683
10	1	3.9192	2.8537
15	1	3.9192	3.6416
20	1	3.9192	4.3426
25	1	3.9192	4.9663
30	1	3.9192	5.5212
35	1	3.9192	6.015
40	1	3.9192	6.4543
45	1	3.9192	6.8452
50	1	3.9192	7.193
55	1	3.9192	7.5025
60	1	3.9192	7.7778
65	1	3.9192	8.0228
70	1	3.9192	8.2408
75	1	3.9192	8.4347
80	1	3.9192	8.6073
85	1	3.9192	8.7608
90	1	3.9192	8.8974
95	1	3.9192	9.019
100	1	3.9192	9.1271
0	1	3.9899	0
5	1	3.9899	1.9443
10	1	3.9899	2.8057
15	1	3.9899	3.575
20	1	3.9899	4.262
25	1	3.9899	4.8755
30	1	3.9899	5.4235
35	1	3.9899	5.9128
40	1	3.9899	6.3499
45	1	3.9899	6.7402
50	1	3.9899	7.0887
55	1	3.9899	7.4
60	1	3.9899	7.678
65	1	3.9899	7.9263
70	1	3.9899	8.1481
75	1	3.9899	8.3461
80	1	3.9899	8.5229
85	1	3.9899	8.6809
90	1	3.9899	8.8219
95	1	3.9899	8.9479
100	1	3.9899	9.0604
0	1	4.0606	0
5	1	4.0606	1.9209
10	1	4.0606	2.7587
15	1	4.0606	3.5097
20	1	4.0606	4.1827
25	1	4.0606	4.786
30	1	4.0606	5.3267
35	1	4.0606	5.8114
40	1	4.0606	6.2457
45	1	4.0606	6.6351
50	1	4.0606	6.984
55	1	4.0606	7.2968
60	1	4.0606	7.5771
65	1	4.0606	7.8284
70	1	4.0606	8.0536
75	1	4.0606	8.2554
80	1	4.0606	8.4363
85	1	4.0606	8.5985
90	1	4.0606	8.7438
95	1	4.0606	8.8741
100	1	4.0606	8.9909
0	1	4.1313	0
5	1	4.1313	1.8981
10	1	4.1313	2.7129
15	1	4.1313	3.4458
20	1	4.1313	4.1049
25	1	4.1313	4.6978
30	1	4.1313	5.231
35	1	4.1313	5.7107
40	1	4.1313	6.142
45	1	4.1313	6.53
50	1	4.1313	6.879
55	1	4.1313	7.1929
60	1	4.1313	7.4752
65	1	4.1313	7.7291
70	1	4.1313	7.9575
75	1	4.1313	8.1629
80	1	4.1313	8.3477
85	1	4.1313	8.5138
90	1	4.1313	8.6633
95	1	4.1313	8.7977
100	1	4.1313	8.9186
0	1	4.202	0
5	1	4.202	1.8759
10	1	4.202	2.6682
15	1	4.202	3.3832
20	1	4.202	4.0285
25	1	4.202	4.6109
30	1	4.202	5.1365
35	1	4.202	5.6108
40	1	4.202	6.0388
45	1	4.202	6.4252
50	1	4.202	6.7738
55	1	4.202	7.0884
60	1	4.202	7.3724
65	1	4.202	7.6286
70	1	4.202	7.8599
75	1	4.202	8.0686
80	1	4.202	8.257
85	1	4.202	8.427
90	1	4.202	8.5804
95	1	4.202	8.7188
100	1	4.202	8.8438
0	1	4.2727	0
5	1	4.2727	1.8542
10	1	4.2727	2.6246
15	1	4.2727	3.3221
20	1	4.2727	3.9536
25	1	4.2727	4.5254
30	1	4.2727	5.0432
35	1	4.2727	5.5119
40	1	4.2727	5.9364
45	1	4.2727	6.3207
50	1	4.2727	6.6686
55	1	4.2727	6.9837
60	1	4.2727	7.2689
65	1	4.2727	7.5272
70	1	4.2727	7.7611
75	1	4.2727	7.9728
80	1	4.2727	8.1645
85	1	4.2727	8.3381
90	1	4.2727	8.4953
95	1	4.2727	8.6376
100	1	4.2727	8.7664
0	1	4.3434	0
5	1	4.3434	1.8331
10	1	4.3434	2.5821
15	1	4.3434	3.2623
20	1	4.3434	3.8802
25	1	4.3434	4.4414
30	1	4.3434	4.9511
35	1	4.3434	5.4141
40	1	4.3434	5.8346
45	1	4.3434	6.2166
50	1	4.3434	6.5636
55	1	4.3434	6.8787
60	1	4.3434	7.1649
65	1	4.3434	7.4249
70	1	4.3434	7.661
75	1	4.3434	7.8755
80	1	4.3434	8.0703
85	1	4.3434	8.2473
90	1	4.3434	8.408
95	1	4.3434	8.554
100	1	4.3434	8.6866
0	1	4.4141	0
5	1	4.4141	1.8126
10	1	4.4141	2.5406
15	1	4.4141	3.2039
20	1	4.4141	3.8082
25	1	4.4141	4.3588
30	1	4.4141	4.8604
35	1	4.4141	5.3174
40	1	4.4141	5.7338
45	1	4.4141	6.1132
50	1	4.4141	6.4588
55	1	4.4141	6.7737
60	1	4.4141	7.0606
65	1	4.4141	7.3219
70	1	4.4141	7.5601
75	1	4.4141	7.777
80	1	4.4141	7.9747
85	1	4.4141	8.1548
90	1	4.4141	8.3189
95	1	4.4141	8.4683
100	1	4.4141	8.6045
0	1	4.4848	0
5	1	4.4848	1.7927
10	1	4.4848	2.5003
15	1	4.4848	3.1469
20	1	4.4848	3.7378
25	1	4.4848	4.2777
30	1	4.4848	4.7711
35	1	4.4848	5.2219
40	1	4.4848	5.6339
45	1	4.4848	6.0103
50	1	4.4848	6.3543
55	1	4.4848	6.6687
60	1	4.4848	6.9559
65	1	4.4848	7.2183
70	1	4.4848	7.4582
75	1	4.4848	7.6773
80	1	4.4848	7.8776
85	1	4.4848	8.0606
90	1	4.4848	8.2278
95	1	4.4848	8.3806
100	1	4.4848	8.5202
0	1	4.5556	0
5	1	4.5556	1.7732
10	1	4.5556	2.461
15	1	4.5556	3.0913
20	1	4.5556	3.6688
25	1	4.5556	4.1981
30	1	4.5556	4.6831
35	1	4.5556	5.1276
40	1	4.5556	5.535
45	1	4.5556	5.9082
50	1	4.5556	6.2503
55	1	4.5556	6.5638
60	1	4.5556	6.851
65	1	4.5556	7.1143
70	1	4.5556	7.3555
75	1	4.5556	7.5766
80	1	4.5556	7.7792
85	1	4.5556	7.9649
90	1	4.5556	8.135
95	1	4.5556	8.2909
100	1	4.5556	8.4338
0	1	4.6263	0
5	1	4.6263	1.7544
10	1	4.6263	2.4227
15	1	4.6263	3.0369
20	1	4.6263	3.6013
25	1	4.6263	4.12
30	1	4.6263	4.5966
35	1	4.6263	5.0346
40	1	4.6263	5.4371
45	1	4.6263	5.8069
50	1	4.6263	6.1468
55	1	4.6263	6.4592
60	1	4.6263	6.7462
65	1	4.6263	7.0099
70	1	4.6263	7.2523
75	1	4.6263	7.475
80	1	4.6263	7.6797
85	1	4.6263	7.8677
90	1	4.6263	8.0406
95	1	4.6263	8.1994
100	1	4.6263	8.3454
0	1	4.697	0
5	1	4.697	1.736
10	1	4.697	2.3855
15	1	4.697	2.984
20	1	4.697	3.5354
25	1	4.697	4.0435
30	1	4.697	4.5116
35	1	4.697	4.943
40	1	4.697	5.3405
45	1	4.697	5.7067
50	1	4.697	6.0441
55	1	4.697	6.355
60	1	4.697	6.6415
65	1	4.697	6.9055
70	1	4.697	7.1487
75	1	4.697	7.3728
80	1	4.697	7.5793
85	1	4.697	7.7695
90	1	4.697	7.9448
95	1	4.697	8.1064
100	1	4.697	8.2552
0	1	4.7677	0
5	1	4.7677	1.7181
10	1	4.7677	2.3493
15	1	4.7677	2.9323
20	1	4.7677	3.4709
25	1	4.7677	3.9685
30	1	4.7677	4.4281
35	1	4.7677	4.8527
40	1	4.7677	5.245
45	1	4.7677	5.6074
50	1	4.7677	5.9421
55	1	4.7677	6.2514
60	1	4.7677	6.537
65	1	4.7677	6.8009
70	1	4.7677	7.0447
75	1	4.7677	7.2699
80	1	4.7677	7.478
85	1	4.7677	7.6702
90	1	4.7677	7.8477
95	1	4.7677	8.0117
100	1	4.7677	8.1633
0	1	4.8384	0
5	1	4.8384	1.7008
10	1	4.8384	2.314
15	1	4.8384	2.8819
20	1	4.8384	3.4079
25	1	4.8384	3.895
30	1	4.8384	4.3461
35	1	4.8384	4.7639
40	1	4.8384	5.1508
45	1	4.8384	5.5091
50	1	4.8384	5.8409
55	1	4.8384	6.1483
60	1	4.8384	6.4329
65	1	4.8384	6.6964
70	1	4.8384	6.9405
75	1	4.8384	7.1666
80	1	4.8384	7.376
85	1	4.8384	7.5699
90	1	4.8384	7.7494
95	1	4.8384	7.9157
100	1	4.8384	8.0697
0	1	4.9091	0
5	1	4.9091	1.6839
10	1	4.9091	2.2797
15	1	4.9091	2.8328
20	1	4.9091	3.3463
25	1	4.9091	3.823
30	1	4.9091	4.2656
35	1	4.9091	4.6764
40	1	4.9091	5.0578
45	1	4.9091	5.4119
50	1	4.9091	5.7406
55	1	4.9091	6.0458
60	1	4.9091	6.3291
65	1	4.9091	6.5921
70	1	4.9091	6.8362
75	1	4.9091	7.0629
80	1	4.9091	7.2733
85	1	4.9091	7.4687
90	1	4.9091	7.65
95	1	4.9091	7.8184
100	1	4.9091	7.9747
0	1	4.9798	0
5	1	4.9798	1.6675
10	1	4.9798	2.2464
15	1	4.9798	2.785
20	1	4.9798	3.2862
25	1	4.9798	3.7526
30	1	4.9798	4.1865
35	1	4.9798	4.5904
40	1	4.9798	4.9662
45	1	4.9798	5.3159
50	1	4.9798	5.6412
55	1	4.9798	5.944
60	1	4.9798	6.2258
65	1	4.9798	6.488
70	1	4.9798	6.7319
75	1	4.9798	6.959
80	1	4.9798	7.1702
85	1	4.9798	7.3668
90	1	4.9798	7.5497
95	1	4.9798	7.7199
100	1	4.9798	7.8783
0	1	5.0505	0
5	1	5.0505	1.6516
10	1	5.0505	2.2139
15	1	5.0505	2.7384
20	1	5.0505	3.2275
25	1	5.0505	3.6837
30	1	5.0505	4.1091
35	1	5.0505	4.5059
40	1	5.0505	4.876
45	1	5.0505	5.2211
50	1	5.0505	5.543
55	1	5.0505	5.8432
60	1	5.0505	6.1232
65	1	5.0505	6.3844
70	1	5.0505	6.6279
75	1	5.0505	6.855
80	1	5.0505	7.0669
85	1	5.0505	7.2644
90	1	5.0505	7.4487
95	1	5.0505	7.6205
100	1	5.0505	7.7808
0	1	5.1212	0
5	1	5.1212	1.6361
10	1	5.1212	2.1824
15	1	5.1212	2.693
20	1	5.1212	3.1702
25	1	5.1212	3.6163
30	1	5.1212	4.0332
35	1	5.1212	4.423
40	1	5.1212	4.7872
45	1	5.1212	5.1277
50	1	5.1212	5.4459
55	1	5.1212	5.7433
60	1	5.1212	6.0214
65	1	5.1212	6.2812
70	1	5.1212	6.5241
75	1	5.1212	6.7511
80	1	5.1212	6.9633
85	1	5.1212	7.1617
90	1	5.1212	7.347
95	1	5.1212	7.5203
100	1	5.1212	7.6823
0	1	5.1919	0
5	1	5.1919	1.6211
10	1	5.1919	2.1517
15	1	5.1919	2.6487
20	1	5.1919	3.1143
25	1	5.1919	3.5504
30	1	5.1919	3.9588
35	1	5.1919	4.3414
40	1	5.1919	4.6998
45	1	5.1919	5.0354
50	1	5.1919	5.3498
55	1	5.1919	5.6443
60	1	5.1919	5.9202
65	1	5.1919	6.1785
70	1	5.1919	6.4206
75	1	5.1919	6.6472
80	1	5.1919	6.8596
85	1	5.1919	7.0584
90	1	5.1919	7.2447
95	1	5.1919	7.4192
100	1	5.1919	7.5827
0	1	5.2626	0
5	1	5.2626	1.6065
10	1	5.2626	2.1219
15	1	5.2626	2.6057
20	1	5.2626	3.0598
25	1	5.2626	3.486
30	1	5.2626	3.886
35	1	5.2626	4.2615
40	1	5.2626	4.6139
45	1	5.2626	4.9446
50	1	5.2626	5.2551
55	1	5.2626	5.5465
60	1	5.2626	5.82
65	1	5.2626	6.0767
70	1	5.2626	6.3176
75	1	5.2626	6.5437
80	1	5.2626	6.756
85	1	5.2626	6.9552
90	1	5.2626	7.1422
95	1	5.2626	7.3177
100	1	5.2626	7.4824
0	1	5.3333	0
5	1	5.3333	1.5923
10	1	5.3333	2.0929
15	1	5.3333	2.5638
20	1	5.3333	3.0066
25	1	5.3333	3.4231
30	1	5.3333	3.8147
35	1	5.3333	4.183
40	1	5.3333	4.5294
45	1	5.3333	4.8552
50	1	5.3333	5.1616
55	1	5.3333	5.4497
60	1	5.3333	5.7207
65	1	5.3333	5.9755
70	1	5.3333	6.2151
75	1	5.3333	6.4405
80	1	5.3333	6.6525
85	1	5.3333	6.8518
90	1	5.3333	7.0393
95	1	5.3333	7.2156
100	1	5.3333	7.3814
0	1	5.404	0
5	1	5.404	1.5785
10	1	5.404	2.0648
15	1	5.404	2.523
20	1	5.404	2.9548
25	1	5.404	3.3616
30	1	5.404	3.7449
35	1	5.404	4.1061
40	1	5.404	4.4465
45	1	5.404	4.7672
50	1	5.404	5.0693
55	1	5.404	5.3541
60	1	5.404	5.6223
65	1	5.404	5.8751
70	1	5.404	6.1133
75	1	5.404	6.3378
80	1	5.404	6.5492
85	1	5.404	6.7485
90	1	5.404	6.9363
95	1	5.404	7.1132
100	1	5.404	7.2799
0	1	5.4747	0
5	1	5.4747	1.5651
10	1	5.4747	2.0374
15	1	5.4747	2.4833
20	1	5.4747	2.9042
25	1	5.4747	3.3015
30	1	5.4747	3.6766
35	1	5.4747	4.0307
40	1	5.4747	4.365
45	1	5.4747	4.6805
50	1	5.4747	4.9784
55	1	5.4747	5.2596
60	1	5.4747	5.525
65	1	5.4747	5.7756
70	1	5.4747	6.0122
75	1	5.4747	6.2355
80	1	5.4747	6.4463
85	1	5.4747	6.6453
90	1	5.4747	6.8331
95	1	5.4747	7.0105
100	1	5.4747	7.1779
0	1	5.5455	0
5	1	5.5455	1.5521
10	1	5.5455	2.0108
15	1	5.5455	2.4446
20	1	5.5455	2.8549
25	1	5.5455	3.2429
30	1	5.5455	3.6099
35	1	5.5455	3.9569
40	1	5.5455	4.285
45	1	5.5455	4.5954
50	1	5.5455	4.8888
55	1	5.5455	5.1664
60	1	5.5455	5.4289
65	1	5.5455	5.6771
70	1	5.5455	5.9119
75	1	5.5455	6.1338
80	1	5.5455	6.3438
85	1	5.5455	6.5423
90	1	5.5455	6.7301
95	1	5.5455	6.9077
100	1	5.5455	7.0756
0	1	5.6162	0
5	1	5.6162	1.5394
10	1	5.6162	1.985
15	1	5.6162	2.407
20	1	5.6162	2.8069
25	1	5.6162	3.1857
30	1	5.6162	3.5445
35	1	5.6162	3.8845
40	1	5.6162	4.2065
45	1	5.6162	4.5116
50	1	5.6162	4.8006
55	1	5.6162	5.0744
60	1	5.6162	5.3338
65	1	5.6162	5.5795
70	1	5.6162	5.8123
75	1	5.6162	6.0328
80	1	5.6162	6.2417
85	1	5.6162	6.4397
90	1	5.6162	6.6271
95	1	5.6162	6.8048
100	1	5.6162	6.973
0	1	5.6869	0
5	1	5.6869	1.5271
10	1	5.6869	1.9598
15	1	5.6869	2.3705
20	1	5.6869	2.7601
25	1	5.6869	3.1298
30	1	5.6869	3.4807
35	1	5.6869	3.8136
40	1	5.6869	4.1296
45	1	5.6869	4.4294
50	1	5.6869	4.7138
55	1	5.6869	4.9838
60	1	5.6869	5.24
65	1	5.6869	5.4831
70	1	5.6869	5.7138
75	1	5.6869	5.9326
80	1	5.6869	6.1404
85	1	5.6869	6.3375
90	1	5.6869	6.5245
95	1	5.6869	6.702
100	1	5.6869	6.8704
0	1	5.7576	0
5	1	5.7576	1.5152
10	1	5.7576	1.9354
15	1	5.7576	2.3349
20	1	5.7576	2.7145
25	1	5.7576	3.0753
30	1	5.7576	3.4183
35	1	5.7576	3.7443
40	1	5.7576	4.0541
45	1	5.7576	4.3486
50	1	5.7576	4.6285
55	1	5.7576	4.8945
60	1	5.7576	5.1474
65	1	5.7576	5.3877
70	1	5.7576	5.6162
75	1	5.7576	5.8333
80	1	5.7576	6.0397
85	1	5.7576	6.2358
90	1	5.7576	6.4222
95	1	5.7576	6.5994
100	1	5.7576	6.7679
0	1	5.8283	0
5	1	5.8283	1.5036
10	1	5.8283	1.9117
15	1	5.8283	2.3003
20	1	5.8283	2.6701
25	1	5.8283	3.0222
30	1	5.8283	3.3574
35	1	5.8283	3.6764
40	1	5.8283	3.9802
45	1	5.8283	4.2693
50	1	5.8283	4.5446
55	1	5.8283	4.8066
60	1	5.8283	5.0561
65	1	5.8283	5.2936
70	1	5.8283	5.5196
75	1	5.8283	5.7348
80	1	5.8283	5.9397
85	1	5.8283	6.1347
90	1	5.8283	6.3204
95	1	5.8283	6.4971
100	1	5.8283	6.6654
0	1	5.899	0
5	1	5.899	1.4924
10	1	5.899	1.8887
15	1	5.899	2.2666
20	1	5.899	2.6269
25	1	5.899	2.9703
30	1	5.899	3.2978
35	1	5.899	3.6101
40	1	5.899	3.9077
45	1	5.899	4.1916
50	1	5.899	4.4621
55	1	5.899	4.7201
60	1	5.899	4.9661
65	1	5.899	5.2006
70	1	5.899	5.4242
75	1	5.899	5.6374
80	1	5.899	5.8406
85	1	5.899	6.0344
90	1	5.899	6.2191
95	1	5.899	6.3952
100	1	5.899	6.5632
0	1	5.9697	0
5	1	5.9697	1.4815
10	1	5.9697	1.8664
15	1	5.9697	2.2339
20	1	5.9697	2.5848
25	1	5.9697	2.9198
30	1	5.9697	3.2397
35	1	5.9697	3.5452
40	1	5.9697	3.8368
45	1	5.9697	4.1153
50	1	5.9697	4.3812
55	1	5.9697	4.635
60	1	5.9697	4.8774
65	1	5.9697	5.1089
70	1	5.9697	5.3299
75	1	5.9697	5.5409
80	1	5.9697	5.7424
85	1	5.9697	5.9347
90	1	5.9697	6.1184
95	1	5.9697	6.2938
100	1	5.9697	6.4613
0	1	6.0404	0
5	1	6.0404	1.4709
10	1	6.0404	1.8446
15	1	6.0404	2.202
20	1	6.0404	2.5438
25	1	6.0404	2.8705
30	1	6.0404	3.183
35	1	6.0404	3.4817
40	1	6.0404	3.7674
45	1	6.0404	4.0405
50	1	6.0404	4.3017
55	1	6.0404	4.5514
60	1	6.0404	4.7901
65	1	6.0404	5.0185
70	1	6.0404	5.2368
75	1	6.0404	5.4455
80	1	6.0404	5.6451
85	1	6.0404	5.8359
90	1	6.0404	6.0184
95	1	6.0404	6.1929
100	1	6.0404	6.3597
0	1	6.1111	0
5	1	6.1111	1.4605
10	1	6.1111	1.8235
15	1	6.1111	2.1711
20	1	6.1111	2.5038
25	1	6.1111	2.8225
30	1	6.1111	3.1276
35	1	6.1111	3.4197
40	1	6.1111	3.6994
45	1	6.1111	3.9672
50	1	6.1111	4.2236
55	1	6.1111	4.4692
60	1	6.1111	4.7042
65	1	6.1111	4.9293
70	1	6.1111	5.1449
75	1	6.1111	5.3513
80	1	6.1111	5.5488
85	1	6.1111	5.738
90	1	6.1111	5.9192
95	1	6.1111	6.0927
100	1	6.1111	6.2587
0	1	6.1818	0
5	1	6.1818	1.4505
10	1	6.1818	1.803
15	1	6.1818	2.141
20	1	6.1818	2.465
25	1	6.1818	2.7757
30	1	6.1818	3.0735
35	1	6.1818	3.3591
40	1	6.1818	3.6329
45	1	6.1818	3.8954
50	1	6.1818	4.1471
55	1	6.1818	4.3884
60	1	6.1818	4.6197
65	1	6.1818	4.8416
70	1	6.1818	5.0542
75	1	6.1818	5.2582
80	1	6.1818	5.4537
85	1	6.1818	5.6411
90	1	6.1818	5.8208
95	1	6.1818	5.9931
100	1	6.1818	6.1583
0	1	6.2525	0
5	1	6.2525	1.4408
10	1	6.2525	1.7831
15	1	6.2525	2.1117
20	1	6.2525	2.4272
25	1	6.2525	2.73
30	1	6.2525	3.0208
35	1	6.2525	3.2999
40	1	6.2525	3.5678
45	1	6.2525	3.8251
50	1	6.2525	4.072
55	1	6.2525	4.3091
60	1	6.2525	4.5367
65	1	6.2525	4.7552
70	1	6.2525	4.9649
75	1	6.2525	5.1663
80	1	6.2525	5.3596
85	1	6.2525	5.5451
90	1	6.2525	5.7233
95	1	6.2525	5.8943
100	1	6.2525	6.0585
0	1	6.3232	0
5	1	6.3232	1.4314
10	1	6.3232	1.7638
15	1	6.3232	2.0833
20	1	6.3232	2.3904
25	1	6.3232	2.6856
30	1	6.3232	2.9693
35	1	6.3232	3.2421
40	1	6.3232	3.5042
45	1	6.3232	3.7562
50	1	6.3232	3.9984
55	1	6.3232	4.2312
60	1	6.3232	4.455
65	1	6.3232	4.6701
70	1	6.3232	4.8769
75	1	6.3232	5.0756
80	1	6.3232	5.2666
85	1	6.3232	5.4503
90	1	6.3232	5.6268
95	1	6.3232	5.7964
100	1	6.3232	5.9595
0	1	6.3939	0
5	1	6.3939	1.4222
10	1	6.3939	1.745
15	1	6.3939	2.0556
20	1	6.3939	2.3546
25	1	6.3939	2.6423
30	1	6.3939	2.9192
35	1	6.3939	3.1856
40	1	6.3939	3.442
45	1	6.3939	3.6888
50	1	6.3939	3.9263
55	1	6.3939	4.1549
60	1	6.3939	4.3748
65	1	6.3939	4.5865
70	1	6.3939	4.7902
75	1	6.3939	4.9862
80	1	6.3939	5.1749
85	1	6.3939	5.3565
90	1	6.3939	5.5312
95	1	6.3939	5.6994
100	1	6.3939	5.8612
0	1	6.4646	0
5	1	6.4646	1.4133
10	1	6.4646	1.7268
15	1	6.4646	2.0288
20	1	6.4646	2.3197
25	1	6.4646	2.6001
30	1	6.4646	2.8702
35	1	6.4646	3.1305
40	1	6.4646	3.3813
45	1	6.4646	3.6229
50	1	6.4646	3.8557
55	1	6.4646	4.0799
60	1	6.4646	4.2961
65	1	6.4646	4.5043
70	1	6.4646	4.7049
75	1	6.4646	4.8982
80	1	6.4646	5.0844
85	1	6.4646	5.2638
90	1	6.4646	5.4367
95	1	6.4646	5.6033
100	1	6.4646	5.7638
0	1	6.5354	0
5	1	6.5354	1.4047
10	1	6.5354	1.709
15	1	6.5354	2.0026
20	1	6.5354	2.2859
25	1	6.5354	2.559
30	1	6.5354	2.8225
35	1	6.5354	3.0767
40	1	6.5354	3.3219
45	1	6.5354	3.5584
50	1	6.5354	3.7865
55	1	6.5354	4.0065
60	1	6.5354	4.2188
65	1	6.5354	4.4235
70	1	6.5354	4.621
75	1	6.5354	4.8115
80	1	6.5354	4.9952
85	1	6.5354	5.1724
90	1	6.5354	5.3434
95	1	6.5354	5.5083
100	1	6.5354	5.6673
0	1	6.6061	0
5	1	6.6061	1.3963
10	1	6.6061	1.6918
15	1	6.6061	1.9773
20	1	6.6061	2.2529
25	1	6.6061	2.519
30	1	6.6061	2.776
35	1	6.6061	3.0242
40	1	6.6061	3.2639
45	1	6.6061	3.4953
50	1	6.6061	3.7188
55	1	6.6061	3.9345
60	1	6.6061	4.1429
65	1	6.6061	4.3441
70	1	6.6061	4.5384
75	1	6.6061	4.7261
80	1	6.6061	4.9073
85	1	6.6061	5.0822
90	1	6.6061	5.2512
95	1	6.6061	5.4143
100	1	6.6061	5.5719
0	1	6.6768	0
5	1	6.6768	1.3881
10	1	6.6768	1.6751
15	1	6.6768	1.9526
20	1	6.6768	2.2208
25	1	6.6768	2.4801
30	1	6.6768	2.7307
35	1	6.6768	2.973
40	1	6.6768	3.2072
45	1	6.6768	3.4336
50	1	6.6768	3.6525
55	1	6.6768	3.864
60	1	6.6768	4.0685
65	1	6.6768	4.2662
70	1	6.6768	4.4573
75	1	6.6768	4.6421
80	1	6.6768	4.8206
85	1	6.6768	4.9933
90	1	6.6768	5.1601
95	1	6.6768	5.3214
100	1	6.6768	5.4774
0	1	6.7475	0
5	1	6.7475	1.3802
10	1	6.7475	1.6589
15	1	6.7475	1.9286
20	1	6.7475	2.1896
25	1	6.7475	2.4422
30	1	6.7475	2.6866
35	1	6.7475	2.923
40	1	6.7475	3.1519
45	1	6.7475	3.3733
50	1	6.7475	3.5876
55	1	6.7475	3.795
60	1	6.7475	3.9956
65	1	6.7475	4.1898
70	1	6.7475	4.3776
75	1	6.7475	4.5594
80	1	6.7475	4.7354
85	1	6.7475	4.9056
90	1	6.7475	5.0703
95	1	6.7475	5.2297
100	1	6.7475	5.384
0	1	6.8182	0
5	1	6.8182	1.3725
10	1	6.8182	1.6431
15	1	6.8182	1.9053
20	1	6.8182	2.1593
25	1	6.8182	2.4053
30	1	6.8182	2.6435
35	1	6.8182	2.8743
40	1	6.8182	3.0979
45	1	6.8182	3.3144
50	1	6.8182	3.5242
55	1	6.8182	3.7273
60	1	6.8182	3.9241
65	1	6.8182	4.1147
70	1	6.8182	4.2994
75	1	6.8182	4.4782
80	1	6.8182	4.6514
85	1	6.8182	4.8192
90	1	6.8182	4.9818
95	1	6.8182	5.1392
100	1	6.8182	5.2917
0	1	6.8889	0
5	1	6.8889	1.365
10	1	6.8889	1.6278
15	1	6.8889	1.8827
20	1	6.8889	2.1298
25	1	6.8889	2.3693
30	1	6.8889	2.6016
35	1	6.8889	2.8268
40	1	6.8889	3.0451
45	1	6.8889	3.2568
50	1	6.8889	3.4621
55	1	6.8889	3.6611
60	1	6.8889	3.8541
65	1	6.8889	4.0411
70	1	6.8889	4.2225
75	1	6.8889	4.3984
80	1	6.8889	4.5689
85	1	6.8889	4.7342
90	1	6.8889	4.8945
95	1	6.8889	5.0499
100	1	6.8889	5.2006
0	1	6.9596	0
5	1	6.9596	1.3577
10	1	6.9596	1.613
15	1	6.9596	1.8607
20	1	6.9596	2.1011
25	1	6.9596	2.3344
30	1	6.9596	2.5608
35	1	6.9596	2.7805
40	1	6.9596	2.9937
45	1	6.9596	3.2006
50	1	6.9596	3.4014
55	1	6.9596	3.5963
60	1	6.9596	3.7854
65	1	6.9596	3.969
70	1	6.9596	4.1471
75	1	6.9596	4.32
80	1	6.9596	4.4877
85	1	6.9596	4.6505
90	1	6.9596	4.8085
95	1	6.9596	4.9618
100	1	6.9596	5.1106
0	1	7.0303	0
5	1	7.0303	1.3507
10	1	7.0303	1.5985
15	1	7.0303	1.8393
20	1	7.0303	2.0732
25	1	7.0303	2.3003
30	1	7.0303	2.521
35	1	7.0303	2.7353
40	1	7.0303	2.9435
45	1	7.0303	3.1457
50	1	7.0303	3.3421
55	1	7.0303	3.5329
60	1	7.0303	3.7183
65	1	7.0303	3.8983
70	1	7.0303	4.0731
75	1	7.0303	4.243
80	1	7.0303	4.4079
85	1	7.0303	4.5682
90	1	7.0303	4.7239
95	1	7.0303	4.8751
100	1	7.0303	5.0219
0	1	7.101	0
5	1	7.101	1.3438
10	1	7.101	1.5845
15	1	7.101	1.8185
20	1	7.101	2.046
25	1	7.101	2.2672
30	1	7.101	2.4822
35	1	7.101	2.6913
40	1	7.101	2.8945
45	1	7.101	3.0921
50	1	7.101	3.2841
55	1	7.101	3.4709
60	1	7.101	3.6524
65	1	7.101	3.8289
70	1	7.101	4.0005
75	1	7.101	4.1673
80	1	7.101	4.3295
85	1	7.101	4.4872
90	1	7.101	4.6405
95	1	7.101	4.7895
100	1	7.101	4.9344
0	1	7.1717	0
5	1	7.1717	1.3372
10	1	7.1717	1.5709
15	1	7.1717	1.7984
20	1	7.1717	2.0197
25	1	7.1717	2.235
30	1	7.1717	2.4445
35	1	7.1717	2.6484
40	1	7.1717	2.8467
45	1	7.1717	3.0397
50	1	7.1717	3.2275
55	1	7.1717	3.4103
60	1	7.1717	3.5881
65	1	7.1717	3.7611
70	1	7.1717	3.9294
75	1	7.1717	4.0932
80	1	7.1717	4.2526
85	1	7.1717	4.4076
90	1	7.1717	4.5585
95	1	7.1717	4.7054
100	1	7.1717	4.8482
0	1	7.2424	0
5	1	7.2424	1.3307
10	1	7.2424	1.5577
15	1	7.2424	1.7788
20	1	7.2424	1.994
25	1	7.2424	2.2036
30	1	7.2424	2.4078
35	1	7.2424	2.6065
40	1	7.2424	2.8001
45	1	7.2424	2.9886
50	1	7.2424	3.1722
55	1	7.2424	3.351
60	1	7.2424	3.5251
65	1	7.2424	3.6946
70	1	7.2424	3.8597
75	1	7.2424	4.0205
80	1	7.2424	4.177
85	1	7.2424	4.3295
90	1	7.2424	4.478
95	1	7.2424	4.6225
100	1	7.2424	4.7633
0	1	7.3131	0
5	1	7.3131	1.3244
10	1	7.3131	1.5449
15	1	7.3131	1.7597
20	1	7.3131	1.9691
25	1	7.3131	2.1731
30	1	7.3131	2.372
35	1	7.3131	2.5658
40	1	7.3131	2.7547
45	1	7.3131	2.9388
50	1	7.3131	3.1182
55	1	7.3131	3.2931
60	1	7.3131	3.4635
65	1	7.3131	3.6295
70	1	7.3131	3.7914
75	1	7.3131	3.9492
80	1	7.3131	4.1029
85	1	7.3131	4.2527
90	1	7.3131	4.3988
95	1	7.3131	4.5411
100	1	7.3131	4.6798
0	1	7.3838	0
5	1	7.3838	1.3183
10	1	7.3838	1.5324
15	1	7.3838	1.7412
20	1	7.3838	1.9448
25	1	7.3838	2.1435
30	1	7.3838	2.3372
35	1	7.3838	2.5261
40	1	7.3838	2.7104
45	1	7.3838	2.8902
50	1	7.3838	3.0655
55	1	7.3838	3.2365
60	1	7.3838	3.4032
65	1	7.3838	3.5659
70	1	7.3838	3.7245
75	1	7.3838	3.8793
80	1	7.3838	4.0302
85	1	7.3838	4.1774
90	1	7.3838	4.321
95	1	7.3838	4.461
100	1	7.3838	4.5976
0	1	7.4545	0
5	1	7.4545	1.3124
10	1	7.4545	1.5203
15	1	7.4545	1.7232
20	1	7.4545	1.9213
25	1	7.4545	2.1146
30	1	7.4545	2.3033
35	1	7.4545	2.4875
40	1	7.4545	2.6672
45	1	7.4545	2.8427
50	1	7.4545	3.014
55	1	7.4545	3.1812
60	1	7.4545	3.3443
65	1	7.4545	3.5036
70	1	7.4545	3.659
75	1	7.4545	3.8108
80	1	7.4545	3.9589
85	1	7.4545	4.1034
90	1	7.4545	4.2445
95	1	7.4545	4.3823
100	1	7.4545	4.5167
0	1	7.5253	0
5	1	7.5253	1.3067
10	1	7.5253	1.5085
15	1	7.5253	1.7058
20	1	7.5253	1.8984
25	1	7.5253	2.0865
30	1	7.5253	2.2703
35	1	7.5253	2.4498
40	1	7.5253	2.6252
45	1	7.5253	2.7964
50	1	7.5253	2.9637
55	1	7.5253	3.1271
60	1	7.5253	3.2868
65	1	7.5253	3.4427
70	1	7.5253	3.595
75	1	7.5253	3.7437
80	1	7.5253	3.889
85	1	7.5253	4.0309
90	1	7.5253	4.1695
95	1	7.5253	4.3049
100	1	7.5253	4.4372
0	1	7.596	0
5	1	7.596	1.3011
10	1	7.596	1.4971
15	1	7.596	1.6888
20	1	7.596	1.8761
25	1	7.596	2.0592
30	1	7.596	2.2382
35	1	7.596	2.4132
40	1	7.596	2.5842
45	1	7.596	2.7513
50	1	7.596	2.9147
55	1	7.596	3.0744
60	1	7.596	3.2305
65	1	7.596	3.3831
70	1	7.596	3.5322
75	1	7.596	3.678
80	1	7.596	3.8205
85	1	7.596	3.9598
90	1	7.596	4.0959
95	1	7.596	4.229
100	1	7.596	4.3591
0	1	7.6667	0
5	1	7.6667	1.2956
10	1	7.6667	1.486
15	1	7.6667	1.6723
20	1	7.6667	1.8545
25	1	7.6667	2.0327
30	1	7.6667	2.207
35	1	7.6667	2.3774
40	1	7.6667	2.5442
45	1	7.6667	2.7073
50	1	7.6667	2.8668
55	1	7.6667	3.0229
60	1	7.6667	3.1755
65	1	7.6667	3.3248
70	1	7.6667	3.4708
75	1	7.6667	3.6137
80	1	7.6667	3.7534
85	1	7.6667	3.89
90	1	7.6667	4.0237
95	1	7.6667	4.1544
100	1	7.6667	4.2823
0	1	7.7374	0
5	1	7.7374	1.2903
10	1	7.7374	1.4753
15	1	7.7374	1.6563
20	1	7.7374	1.8334
25	1	7.7374	2.0069
30	1	7.7374	2.1766
35	1	7.7374	2.3427
40	1	7.7374	2.5053
45	1	7.7374	2.6644
50	1	7.7374	2.8202
55	1	7.7374	2.9726
60	1	7.7374	3.1218
65	1	7.7374	3.2679
70	1	7.7374	3.4108
75	1	7.7374	3.5507
80	1	7.7374	3.6877
85	1	7.7374	3.8217
90	1	7.7374	3.9529
95	1	7.7374	4.0813
100	1	7.7374	4.207
0	1	7.8081	0
5	1	7.8081	1.2852
10	1	7.8081	1.4648
15	1	7.8081	1.6407
20	1	7.8081	1.813
25	1	7.8081	1.9817
30	1	7.8081	2.147
35	1	7.8081	2.3088
40	1	7.8081	2.4674
45	1	7.8081	2.6226
50	1	7.8081	2.7746
55	1	7.8081	2.9236
60	1	7.8081	3.0694
65	1	7.8081	3.2122
70	1	7.8081	3.3521
75	1	7.8081	3.4891
80	1	7.8081	3.6233
85	1	7.8081	3.7548
90	1	7.8081	3.8835
95	1	7.8081	4.0095
100	1	7.8081	4.133
0	1	7.8788	0
5	1	7.8788	1.2802
10	1	7.8788	1.4547
15	1	7.8788	1.6256
20	1	7.8788	1.7931
25	1	7.8788	1.9573
30	1	7.8788	2.1182
35	1	7.8788	2.2759
40	1	7.8788	2.4304
45	1	7.8788	2.5818
50	1	7.8788	2.7302
55	1	7.8788	2.8757
60	1	7.8788	3.0182
65	1	7.8788	3.1579
70	1	7.8788	3.2947
75	1	7.8788	3.4289
80	1	7.8788	3.5603
85	1	7.8788	3.6892
90	1	7.8788	3.8154
95	1	7.8788	3.9391
100	1	7.8788	4.0604
0	1	7.9495	0
5	1	7.9495	1.2754
10	1	7.9495	1.4448
15	1	7.9495	1.6109
20	1	7.9495	1.7738
25	1	7.9495	1.9336
30	1	7.9495	2.0902
35	1	7.9495	2.2438
40	1	7.9495	2.3944
45	1	7.9495	2.5421
50	1	7.9495	2.6869
55	1	7.9495	2.829
60	1	7.9495	2.9682
65	1	7.9495	3.1048
70	1	7.9495	3.2387
75	1	7.9495	3.3699
80	1	7.9495	3.4987
85	1	7.9495	3.6249
90	1	7.9495	3.7487
95	1	7.9495	3.8701
100	1	7.9495	3.9892
0	1	8.0202	0
5	1	8.0202	1.2707
10	1	8.0202	1.4352
15	1	8.0202	1.5967
20	1	8.0202	1.7551
25	1	8.0202	1.9105
30	1	8.0202	2.063
35	1	8.0202	2.2126
40	1	8.0202	2.3594
45	1	8.0202	2.5034
50	1	8.0202	2.6447
55	1	8.0202	2.7834
60	1	8.0202	2.9194
65	1	8.0202	3.0529
70	1	8.0202	3.1838
75	1	8.0202	3.3123
80	1	8.0202	3.4384
85	1	8.0202	3.5621
90	1	8.0202	3.6834
95	1	8.0202	3.8025
100	1	8.0202	3.9193
0	1	8.0909	0
5	1	8.0909	1.2661
10	1	8.0909	1.4259
15	1	8.0909	1.5828
20	1	8.0909	1.7368
25	1	8.0909	1.888
30	1	8.0909	2.0365
35	1	8.0909	2.1822
40	1	8.0909	2.3253
45	1	8.0909	2.4657
50	1	8.0909	2.6036
55	1	8.0909	2.7389
60	1	8.0909	2.8718
65	1	8.0909	3.0022
70	1	8.0909	3.1303
75	1	8.0909	3.256
80	1	8.0909	3.3794
85	1	8.0909	3.5006
90	1	8.0909	3.6195
95	1	8.0909	3.7363
100	1	8.0909	3.8509
0	1	8.1616	0
5	1	8.1616	1.2616
10	1	8.1616	1.4169
15	1	8.1616	1.5694
20	1	8.1616	1.7191
25	1	8.1616	1.8662
30	1	8.1616	2.0107
35	1	8.1616	2.1526
40	1	8.1616	2.292
45	1	8.1616	2.429
50	1	8.1616	2.5635
55	1	8.1616	2.6956
60	1	8.1616	2.8253
65	1	8.1616	2.9528
70	1	8.1616	3.078
75	1	8.1616	3.2009
80	1	8.1616	3.3217
85	1	8.1616	3.4404
90	1	8.1616	3.5569
95	1	8.1616	3.6713
100	1	8.1616	3.7838
0	1	8.2323	0
5	1	8.2323	1.2573
10	1	8.2323	1.4081
15	1	8.2323	1.5563
20	1	8.2323	1.7019
25	1	8.2323	1.845
30	1	8.2323	1.9856
35	1	8.2323	2.1239
40	1	8.2323	2.2597
45	1	8.2323	2.3932
50	1	8.2323	2.5244
55	1	8.2323	2.6533
60	1	8.2323	2.78
65	1	8.2323	2.9045
70	1	8.2323	3.0269
75	1	8.2323	3.1471
80	1	8.2323	3.2653
85	1	8.2323	3.3815
90	1	8.2323	3.4956
95	1	8.2323	3.6078
100	1	8.2323	3.718
0	1	8.303	0
5	1	8.303	1.2531
10	1	8.303	1.3996
15	1	8.303	1.5436
20	1	8.303	1.6852
25	1	8.303	1.8244
30	1	8.303	1.9613
35	1	8.303	2.0959
40	1	8.303	2.2282
45	1	8.303	2.3583
50	1	8.303	2.4863
55	1	8.303	2.6121
60	1	8.303	2.7358
65	1	8.303	2.8574
70	1	8.303	2.977
75	1	8.303	3.0946
80	1	8.303	3.2102
85	1	8.303	3.3239
90	1	8.303	3.4357
95	1	8.303	3.5456
100	1	8.303	3.6536
0	1	8.3737	0
5	1	8.3737	1.249
10	1	8.3737	1.3913
15	1	8.3737	1.5312
20	1	8.3737	1.6689
25	1	8.3737	1.8043
30	1	8.3737	1.9376
35	1	8.3737	2.0686
40	1	8.3737	2.1975
45	1	8.3737	2.3244
50	1	8.3737	2.4491
55	1	8.3737	2.5719
60	1	8.3737	2.6926
65	1	8.3737	2.8114
70	1	8.3737	2.9283
75	1	8.3737	3.0432
80	1	8.3737	3.1563
85	1	8.3737	3.2676
90	1	8.3737	3.377
95	1	8.3737	3.4847
100	1	8.3737	3.5906
0	1	8.4444	0
5	1	8.4444	1.2451
10	1	8.4444	1.3833
15	1	8.4444	1.5193
20	1	8.4444	1.6531
25	1	8.4444	1.7848
30	1	8.4444	1.9145
35	1	8.4444	2.0421
40	1	8.4444	2.1677
45	1	8.4444	2.2913
50	1	8.4444	2.413
55	1	8.4444	2.5327
60	1	8.4444	2.6506
65	1	8.4444	2.7666
70	1	8.4444	2.8807
75	1	8.4444	2.9931
80	1	8.4444	3.1037
85	1	8.4444	3.2125
90	1	8.4444	3.3196
95	1	8.4444	3.4251
100	1	8.4444	3.5289
0	1	8.5152	0
5	1	8.5152	1.2412
10	1	8.5152	1.3754
15	1	8.5152	1.5076
20	1	8.5152	1.6377
25	1	8.5152	1.7659
30	1	8.5152	1.8921
35	1	8.5152	2.0163
40	1	8.5152	2.1387
45	1	8.5152	2.2591
50	1	8.5152	2.3777
55	1	8.5152	2.4945
60	1	8.5152	2.6096
65	1	8.5152	2.7228
70	1	8.5152	2.8343
75	1	8.5152	2.9441
80	1	8.5152	3.0523
85	1	8.5152	3.1587
90	1	8.5152	3.2636
95	1	8.5152	3.3668
100	1	8.5152	3.4684
0	1	8.5859	0
5	1	8.5859	1.2375
10	1	8.5859	1.3679
15	1	8.5859	1.4963
20	1	8.5859	1.6228
25	1	8.5859	1.7475
30	1	8.5859	1.8703
35	1	8.5859	1.9912
40	1	8.5859	2.1104
45	1	8.5859	2.2278
50	1	8.5859	2.3434
55	1	8.5859	2.4574
60	1	8.5859	2.5696
65	1	8.5859	2.6801
70	1	8.5859	2.7891
75	1	8.5859	2.8964
80	1	8.5859	3.002
85	1	8.5859	3.1062
90	1	8.5859	3.2087
95	1	8.5859	3.3098
100	1	8.5859	3.4093
0	1	8.6566	0
5	1	8.6566	1.2338
10	1	8.6566	1.3605
15	1	8.6566	1.4853
20	1	8.6566	1.6083
25	1	8.6566	1.7296
30	1	8.6566	1.8491
35	1	8.6566	1.9668
40	1	8.6566	2.0829
45	1	8.6566	2.1973
50	1	8.6566	2.31
55	1	8.6566	2.4211
60	1	8.6566	2.5306
65	1	8.6566	2.6385
70	1	8.6566	2.7449
75	1	8.6566	2.8497
80	1	8.6566	2.953
85	1	8.6566	3.0548
90	1	8.6566	3.1552
95	1	8.6566	3.2541
100	1	8.6566	3.3515
0	1	8.7273	0
5	1	8.7273	1.2303
10	1	8.7273	1.3533
15	1	8.7273	1.4746
20	1	8.7273	1.5942
25	1	8.7273	1.7122
30	1	8.7273	1.8284
35	1	8.7273	1.9431
40	1	8.7273	2.0561
45	1	8.7273	2.1676
50	1	8.7273	2.2774
55	1	8.7273	2.3858
60	1	8.7273	2.4926
65	1	8.7273	2.5979
70	1	8.7273	2.7018
75	1	8.7273	2.8042
80	1	8.7273	2.9051
85	1	8.7273	3.0047
90	1	8.7273	3.1028
95	1	8.7273	3.1996
100	1	8.7273	3.295
0	1	8.798	0
5	1	8.798	1.2268
10	1	8.798	1.3464
15	1	8.798	1.4643
20	1	8.798	1.5805
25	1	8.798	1.6953
30	1	8.798	1.8084
35	1	8.798	1.92
40	1	8.798	2.0301
45	1	8.798	2.1386
50	1	8.798	2.2457
55	1	8.798	2.3514
60	1	8.798	2.4556
65	1	8.798	2.5584
70	1	8.798	2.6597
75	1	8.798	2.7597
80	1	8.798	2.8584
85	1	8.798	2.9557
90	1	8.798	3.0516
95	1	8.798	3.1463
100	1	8.798	3.2397
0	1	8.8687	0
5	1	8.8687	1.2235
10	1	8.8687	1.3396
15	1	8.8687	1.4542
20	1	8.8687	1.5672
25	1	8.8687	1.6788
30	1	8.8687	1.7889
35	1	8.8687	1.8975
40	1	8.8687	2.0047
45	1	8.8687	2.1105
50	1	8.8687	2.2149
55	1	8.8687	2.3179
60	1	8.8687	2.4195
65	1	8.8687	2.5198
70	1	8.8687	2.6188
75	1	8.8687	2.7164
80	1	8.8687	2.8128
85	1	8.8687	2.9079
90	1	8.8687	3.0017
95	1	8.8687	3.0943
100	1	8.8687	3.1856
0	1	8.9394	0
5	1	8.9394	1.2202
10	1	8.9394	1.333
15	1	8.9394	1.4444
20	1	8.9394	1.5543
25	1	8.9394	1.6628
30	1	8.9394	1.7699
35	1	8.9394	1.8757
40	1	8.9394	1.9801
45	1	8.9394	2.0831
50	1	8.9394	2.1848
55	1	8.9394	2.2852
60	1	8.9394	2.3843
65	1	8.9394	2.4822
70	1	8.9394	2.5788
75	1	8.9394	2.6741
80	1	8.9394	2.7682
85	1	8.9394	2.8612
90	1	8.9394	2.9529
95	1	8.9394	3.0434
100	1	8.9394	3.1328
0	1	9.0101	0
5	1	9.0101	1.2171
10	1	9.0101	1.3267
15	1	9.0101	1.4349
20	1	9.0101	1.5418
25	1	9.0101	1.6473
30	1	9.0101	1.7515
35	1	9.0101	1.8544
40	1	9.0101	1.9561
45	1	9.0101	2.0564
50	1	9.0101	2.1556
55	1	9.0101	2.2534
60	1	9.0101	2.3501
65	1	9.0101	2.4455
70	1	9.0101	2.5398
75	1	9.0101	2.6329
80	1	9.0101	2.7248
85	1	9.0101	2.8156
90	1	9.0101	2.9052
95	1	9.0101	2.9938
100	1	9.0101	3.0812
0	1	9.0808	0
5	1	9.0808	1.214
10	1	9.0808	1.3205
15	1	9.0808	1.4257
20	1	9.0808	1.5296
25	1	9.0808	1.6322
30	1	9.0808	1.7336
35	1	9.0808	1.8338
40	1	9.0808	1.9327
45	1	9.0808	2.0305
50	1	9.0808	2.1271
55	1	9.0808	2.2225
60	1	9.0808	2.3167
65	1	9.0808	2.4098
70	1	9.0808	2.5018
75	1	9.0808	2.5927
80	1	9.0808	2.6824
85	1	9.0808	2.7711
90	1	9.0808	2.8587
95	1	9.0808	2.9453
100	1	9.0808	3.0307
0	1	9.1515	0
5	1	9.1515	1.211
10	1	9.1515	1.3145
15	1	9.1515	1.4167
20	1	9.1515	1.5177
25	1	9.1515	1.6175
30	1	9.1515	1.7162
35	1	9.1515	1.8137
40	1	9.1515	1.91
45	1	9.1515	2.0053
50	1	9.1515	2.0993
55	1	9.1515	2.1923
60	1	9.1515	2.2842
65	1	9.1515	2.375
70	1	9.1515	2.4648
75	1	9.1515	2.5535
80	1	9.1515	2.6411
85	1	9.1515	2.7277
90	1	9.1515	2.8133
95	1	9.1515	2.8979
100	1	9.1515	2.9815
0	1	9.2222	0
5	1	9.2222	1.2081
10	1	9.2222	1.3086
15	1	9.2222	1.408
20	1	9.2222	1.5062
25	1	9.2222	1.6033
30	1	9.2222	1.6993
35	1	9.2222	1.7942
40	1	9.2222	1.888
45	1	9.2222	1.9807
50	1	9.2222	2.0724
55	1	9.2222	2.163
60	1	9.2222	2.2526
65	1	9.2222	2.3411
70	1	9.2222	2.4287
75	1	9.2222	2.5152
80	1	9.2222	2.6008
85	1	9.2222	2.6854
90	1	9.2222	2.769
95	1	9.2222	2.8516
100	1	9.2222	2.9334
0	1	9.2929	0
5	1	9.2929	1.2053
10	1	9.2929	1.3029
15	1	9.2929	1.3995
20	1	9.2929	1.495
25	1	9.2929	1.5894
30	1	9.2929	1.6828
35	1	9.2929	1.7752
40	1	9.2929	1.8665
45	1	9.2929	1.9568
50	1	9.2929	2.0461
55	1	9.2929	2.1344
60	1	9.2929	2.2217
65	1	9.2929	2.3081
70	1	9.2929	2.3935
75	1	9.2929	2.478
80	1	9.2929	2.5615
85	1	9.2929	2.6441
90	1	9.2929	2.7257
95	1	9.2929	2.8065
100	1	9.2929	2.8864
0	1	9.3636	0
5	1	9.3636	1.2025
10	1	9.3636	1.2974
15	1	9.3636	1.3913
20	1	9.3636	1.4841
25	1	9.3636	1.5759
30	1	9.3636	1.6668
35	1	9.3636	1.7567
40	1	9.3636	1.8456
45	1	9.3636	1.9335
50	1	9.3636	2.0205
55	1	9.3636	2.1066
60	1	9.3636	2.1917
65	1	9.3636	2.2759
70	1	9.3636	2.3592
75	1	9.3636	2.4416
80	1	9.3636	2.5231
85	1	9.3636	2.6038
90	1	9.3636	2.6835
95	1	9.3636	2.7625
100	1	9.3636	2.8405
0	1	9.4343	0
5	1	9.4343	1.1998
10	1	9.4343	1.292
15	1	9.4343	1.3833
20	1	9.4343	1.4735
25	1	9.4343	1.5629
30	1	9.4343	1.6513
35	1	9.4343	1.7387
40	1	9.4343	1.8253
45	1	9.4343	1.9109
50	1	9.4343	1.9957
55	1	9.4343	2.0795
60	1	9.4343	2.1625
65	1	9.4343	2.2446
70	1	9.4343	2.3259
75	1	9.4343	2.4062
80	1	9.4343	2.4858
85	1	9.4343	2.5645
90	1	9.4343	2.6424
95	1	9.4343	2.7195
100	1	9.4343	2.7958
0	1	9.5051	0
5	1	9.5051	1.1972
10	1	9.5051	1.2868
15	1	9.5051	1.3755
20	1	9.5051	1.4633
25	1	9.5051	1.5501
30	1	9.5051	1.6361
35	1	9.5051	1.7212
40	1	9.5051	1.8055
45	1	9.5051	1.8889
50	1	9.5051	1.9714
55	1	9.5051	2.0531
60	1	9.5051	2.134
65	1	9.5051	2.2141
70	1	9.5051	2.2933
75	1	9.5051	2.3717
80	1	9.5051	2.4494
85	1	9.5051	2.5262
90	1	9.5051	2.6023
95	1	9.5051	2.6775
100	1	9.5051	2.7521
0	1	9.5758	0
5	1	9.5758	1.1947
10	1	9.5758	1.2818
15	1	9.5758	1.3679
20	1	9.5758	1.4533
25	1	9.5758	1.5378
30	1	9.5758	1.6214
35	1	9.5758	1.7043
40	1	9.5758	1.7863
45	1	9.5758	1.8675
50	1	9.5758	1.9479
55	1	9.5758	2.0275
60	1	9.5758	2.1063
65	1	9.5758	2.1843
70	1	9.5758	2.2616
75	1	9.5758	2.3381
80	1	9.5758	2.4138
85	1	9.5758	2.4888
90	1	9.5758	2.5631
95	1	9.5758	2.6366
100	1	9.5758	2.7094
0	1	9.6465	0
5	1	9.6465	1.1922
10	1	9.6465	1.2768
15	1	9.6465	1.3606
20	1	9.6465	1.4436
25	1	9.6465	1.5258
30	1	9.6465	1.6071
35	1	9.6465	1.6878
40	1	9.6465	1.7676
45	1	9.6465	1.8466
50	1	9.6465	1.9249
55	1	9.6465	2.0025
60	1	9.6465	2.0793
65	1	9.6465	2.1554
70	1	9.6465	2.2307
75	1	9.6465	2.3053
80	1	9.6465	2.3792
85	1	9.6465	2.4524
90	1	9.6465	2.5249
95	1	9.6465	2.5967
100	1	9.6465	2.6678
0	1	9.7172	0
5	1	9.7172	1.1899
10	1	9.7172	1.2721
15	1	9.7172	1.3535
[truncated: 417,770+ more rows]

## Sheet: test_data
time	[Pd(II)]0	k1	[P]t	range of the varied parameters
0	10	7.8081	0	3<k1<10 1<[Pd(II)]0<10
5	10	7.8081	1.6599
10	10	7.8081	2.166
15	10	7.8081	2.6414
20	10	7.8081	3.0879
25	10	7.8081	3.5073
30	10	7.8081	3.9013
35	10	7.8081	4.2714
40	10	7.8081	4.619
45	10	7.8081	4.9455
50	10	7.8081	5.2522
55	10	7.8081	5.5403
60	10	7.8081	5.8109
65	10	7.8081	6.0651
70	10	7.8081	6.3039
75	10	7.8081	6.5281
80	10	7.8081	6.7388
85	10	7.8081	6.9367
90	10	7.8081	7.1226
95	10	7.8081	7.2972
100	10	7.8081	7.4612
0	10	8.0202	0
5	10	8.0202	1.6306
10	10	8.0202	2.109
15	10	8.0202	2.5601
20	10	8.0202	2.9855
25	10	8.0202	3.3865
30	10	8.0202	3.7645
35	10	8.0202	4.121
40	10	8.0202	4.4571
45	10	8.0202	4.7739
50	10	8.0202	5.0727
55	10	8.0202	5.3544
60	10	8.0202	5.6199
65	10	8.0202	5.8703
70	10	8.0202	6.1064
75	10	8.0202	6.329
80	10	8.0202	6.5388
85	10	8.0202	6.7367
90	10	8.0202	6.9233
95	10	8.0202	7.0991
100	10	8.0202	7.265
0	10	8.0909	0
5	10	8.0909	1.6211
10	10	8.0909	2.0905
15	10	8.0909	2.5337
20	10	8.0909	2.952
25	10	8.0909	3.3469
30	10	8.0909	3.7196
35	10	8.0909	4.0715
40	10	8.0909	4.4037
45	10	8.0909	4.7172
50	10	8.0909	5.0132
55	10	8.0909	5.2926
60	10	8.0909	5.5563
65	10	8.0909	5.8053
70	10	8.0909	6.0403
75	10	8.0909	6.2622
80	10	8.0909	6.4716
85	10	8.0909	6.6693
90	10	8.0909	6.8559
95	10	8.0909	7.032
100	10	8.0909	7.1983
0	10	8.303	0
5	10	8.303	1.5932
10	10	8.303	2.0363
15	10	8.303	2.4561
20	10	8.303	2.8537
25	10	8.303	3.2304
30	10	8.303	3.5872
35	10	8.303	3.9252
40	10	8.303	4.2454
45	10	8.303	4.5487
50	10	8.303	4.836
55	10	8.303	5.1082
60	10	8.303	5.366
65	10	8.303	5.6102
70	10	8.303	5.8416
75	10	8.303	6.0608
80	10	8.303	6.2684
85	10	8.303	6.4651
90	10	8.303	6.6514
95	10	8.303	6.8279
100	10	8.303	6.9951
0	10	8.3737	0
5	10	8.3737	1.5842
10	10	8.3737	2.0188
15	10	8.3737	2.4309
20	10	8.3737	2.8217
25	10	8.3737	3.1923
30	10	8.3737	3.5438
35	10	8.3737	3.8772
40	10	8.3737	4.1933
45	10	8.3737	4.4931
50	10	8.3737	4.7775
55	10	8.3737	5.0471
60	10	8.3737	5.3028
65	10	8.3737	5.5454
70	10	8.3737	5.7754
75	10	8.3737	5.9935
80	10	8.3737	6.2004
85	10	8.3737	6.3966
90	10	8.3737	6.5826
95	10	8.3737	6.7591
100	10	8.3737	6.9264
0	0.01	0.013939	0	0.01<k1<0.4 0.01<Pd(II)<1
5	0.01	0.013939	0.0085096
10	0.01	0.013939	0.033229
15	0.01	0.013939	0.072951
20	0.01	0.013939	0.12649
25	0.01	0.013939	0.19268
30	0.01	0.013939	0.27041
35	0.01	0.013939	0.35859
40	0.01	0.013939	0.45619
45	0.01	0.013939	0.56222
50	0.01	0.013939	0.67576
55	0.01	0.013939	0.79593
60	0.01	0.013939	0.92191
65	0.01	0.013939	1.0529
70	0.01	0.013939	1.1882
75	0.01	0.013939	1.3272
80	0.01	0.013939	1.4692
85	0.01	0.013939	1.6137
90	0.01	0.013939	1.7602
95	0.01	0.013939	1.9081
100	0.01	0.013939	2.057
0	0.01	0.017879	0
5	0.01	0.017879	0.010843
10	0.01	0.017879	0.042059
15	0.01	0.017879	0.091727
20	0.01	0.017879	0.15799
25	0.01	0.017879	0.23909
30	0.01	0.017879	0.33336
35	0.01	0.017879	0.43923
40	0.01	0.017879	0.55525
45	0.01	0.017879	0.68006
50	0.01	0.017879	0.81241
55	0.01	0.017879	0.95117
60	0.01	0.017879	1.0953
65	0.01	0.017879	1.2438
70	0.01	0.017879	1.3959
75	0.01	0.017879	1.5507
80	0.01	0.017879	1.7076
85	0.01	0.017879	1.8659
90	0.01	0.017879	2.0251
95	0.01	0.017879	2.1847
100	0.01	0.017879	2.3443
0	0.01	0.033636	0
5	0.01	0.033636	0.019872
10	0.01	0.033636	0.075121
15	0.01	0.033636	0.15973
20	0.01	0.033636	0.26842
25	0.01	0.033636	0.39658
30	0.01	0.033636	0.54027
35	0.01	0.033636	0.69611
40	0.01	0.033636	0.86126
45	0.01	0.033636	1.0333
50	0.01	0.033636	1.2103
55	0.01	0.033636	1.3905
60	0.01	0.033636	1.5727
65	0.01	0.033636	1.7556
70	0.01	0.033636	1.9383
75	0.01	0.033636	2.1202
80	0.01	0.033636	2.3005
85	0.01	0.033636	2.4789
90	0.01	0.033636	2.6549
95	0.01	0.033636	2.8283
100	0.01	0.033636	2.9987
0	0.01	0.037576	0
5	0.01	0.037576	0.022056
10	0.01	0.037576	0.082855
15	0.01	0.037576	0.17512
20	0.01	0.037576	0.29259
25	0.01	0.037576	0.42994
30	0.01	0.037576	0.5827
35	0.01	0.037576	0.74716
40	0.01	0.037576	0.92023
45	0.01	0.037576	1.0994
50	0.01	0.037576	1.2826
55	0.01	0.037576	1.4682
60	0.01	0.037576	1.6548
65	0.01	0.037576	1.8413
70	0.01	0.037576	2.027
75	0.01	0.037576	2.2111
80	0.01	0.037576	2.393
85	0.01	0.037576	2.5725
90	0.01	0.037576	2.7491
95	0.01	0.037576	2.9226
100	0.01	0.037576	3.0929
0	0.01	0.07303	0
5	0.01	0.07303	0.040478
10	0.01	0.07303	0.14414
15	0.01	0.07303	0.29
20	0.01	0.07303	0.46319
25	0.01	0.07303	0.65333
30	0.01	0.07303	0.85329
35	0.01	0.07303	1.0582
40	0.01	0.07303	1.2648
45	0.01	0.07303	1.4708
50	0.01	0.07303	1.6749
55	0.01	0.07303	1.876
60	0.01	0.07303	2.0736
65	0.01	0.07303	2.2673
70	0.01	0.07303	2.4569
75	0.01	0.07303	2.6422
80	0.01	0.07303	2.8232
85	0.01	0.07303	3
90	0.01	0.07303	3.1725
95	0.01	0.07303	3.3409
100	0.01	0.07303	3.5052
0	0.01	0.07697	0
5	0.01	0.07697	0.042396
10	0.01	0.07697	0.15012
15	0.01	0.07697	0.30054
20	0.01	0.07697	0.47794
25	0.01	0.07697	0.67161
30	0.01	0.07697	0.87432
35	0.01	0.07697	1.0813
40	0.01	0.07697	1.2893
45	0.01	0.07697	1.4962
50	0.01	0.07697	1.7008
55	0.01	0.07697	1.9021
60	0.01	0.07697	2.0997
65	0.01	0.07697	2.2931
70	0.01	0.07697	2.4824
75	0.01	0.07697	2.6673
80	0.01	0.07697	2.8479
85	0.01	0.07697	3.0242
90	0.01	0.07697	3.1962
95	0.01	0.07697	3.364
100	0.01	0.07697	3.5278
